# Supplementary material for: Fluorenes as new molecular scaffolds for carbon–carbon σ-bond cleavage reaction: acylfluorenylation of arynes
Source: Royal Society of Chemistry journal article supplement (doi:10.1039/b814597k), 2008-01-01

*Supplementary Information for*

**Fluorenes as new molecular scaffolds for carbon–carbon  $\sigma$ -bond cleavage  
reaction: acylfluorenylation of arynes**

Hiroto Yoshida,\* Takeshi Kishida, Masahiko Watanabe, and Joji Ohshita

*Department of Applied Chemistry, Graduate School of Engineering, Hiroshima University,  
Higashi-Hiroshima 739-8527, Japan.*

**Contents**

|                                                                      |            |
|----------------------------------------------------------------------|------------|
| <b>General Remarks</b>                                               | <b>S2</b>  |
| <b>Aryne Precursors</b>                                              | <b>S2</b>  |
| <b>Fluorenes</b>                                                     | <b>S2</b>  |
| <b>Experimental Procedures and Characterization Data of Products</b> | <b>S3</b>  |
| <b>References</b>                                                    | <b>S11</b> |
| <b><sup>1</sup>H and <sup>13</sup>C NMR Spectra of Products</b>      | <b>S12</b> |

**General Remarks.** All manipulations of oxygen- and moisture-sensitive materials were conducted with a standard Schlenk technique under a purified argon atmosphere. Nuclear magnetic resonance spectra were taken on a JEOL EX-270 ( $^1\text{H}$ , 270 MHz;  $^{13}\text{C}$ , 67.8 MHz) spectrometer or a JEOL Lambda-400 ( $^1\text{H}$ , 400 MHz;  $^{13}\text{C}$ , 99.5 MHz) spectrometer using residual chloroform ( $^1\text{H}$ ,  $\delta = 7.26$ ) or  $\text{CDCl}_3$  ( $^{13}\text{C}$ ,  $\delta = 77.0$ ) as an internal standard.  $^1\text{H}$  NMR data are reported as follows: chemical shift, multiplicity (s = singlet, d = doublet, t = triplet, q = quartet, quint = quintet, sept = septet, br = broad, m = multiplet), coupling constants (Hz), integration. High-resolution mass spectra were obtained with a JEOL JMS-SX102A spectrometer. Melting points were measured with Yanaco Micro Melting Point apparatus and uncorrected. The preparative recycling gel permeation chromatography was performed with GL Science PU 614 equipped with Shodex GPC H-2001L and -2002L columns (benzene or chloroform as an eluent). Column chromatography was carried out using Merck Kieselgel 60. Unless otherwise noted, commercially available reagents were used without purification. 18-Crown-6 was recrystallized from distilled MeCN. KF (spray-dried) was vacuum dried at 100 °C for 12 h. THF was distilled from sodium/benzophenone ketyl. MeCN was distilled from phosphorus pentoxide.

**Aryne Precursors.** 2-(Trimethylsilyl)phenyl triflate (**1a**),<sup>1</sup> 3-(trimethylsilyl)-2-naphthyl triflate (**1b**),<sup>2</sup> 6-(trimethylsilyl)-5-indanyl triflate (**1c**),<sup>3</sup> 3-(trimethylsilyl)-5,6,7,8-tetrahydro-2-naphthyl triflate (**1d**),<sup>2</sup> 4,5-dimethyl-2-(trimethylsilyl)phenyl triflate (**1e**),<sup>3</sup> 1-(trimethylsilyl)-2-naphthyl triflate (**1f**),<sup>4</sup> 3-methoxy-2-(trimethylsilyl)phenyl triflate (**1g**)<sup>5</sup> and 4-methyl-2-(trimethylsilyl)phenyl triflate (**1h**)<sup>6</sup> were prepared according to literature procedures.

**Fluorenes.** Benzoyl fluorene (**2b**) was prepared according to a literature method.<sup>7</sup> Other fluorenyl ketones, except for **2g**, were synthesized in a similar manner as the preparation of **2b**. Ethyl (**2i**) or isopropyl (**2j**) fluorene-9-carboxylate was prepared by standard esterification of fluorene-9-carboxylic acid. Ethyl esters of substituted fluorene-carboxylic acids (**2k–2m**) were prepared from the respective substituted fluorenes according to a literature method.<sup>8</sup> 2,7-Bis(phenylethynyl)fluorene was synthesized by the Sonogashira coupling of 2,7-dibromofluorene and phenylacetylene.<sup>9</sup>

**Preparation of 2g.** To a THF solution (10 mL) of fluorene (1.66 g, 10.0 mol) was added dropwise *n*-BuLi (1.57 M in hexane, 7.00 mL, 11.0 mmol) at 0 °C, and the resulting solution was stirred at 0 °C for 1 h before addition of anhydrous  $\text{MgCl}_2$  (1.05 g, 11.0 mmol) at 0 °C. After the mixture was stirred at 0 °C for 0.5 h, methyl *o*-toluate (4.05 g, 27.0 mmol) was added at 0 °C, and stirring was continued for 2 h at room temperature. The mixture was quenched with saturated aqueous  $\text{NH}_4\text{Cl}$  solution, and extracted with ethyl acetate. The

combined organic layer was dried over  $\text{MgSO}_4$ , and concentrated. Silica gel column chromatography (hexane/dichloromethane as an eluent) followed by recrystallization (hexane/dichloromethane) gave **2g** as a yellow solid.

### A General Procedure for Acylfluorenylation of Arynes.

A Schlenk tube equipped with a magnetic stirring bar was charged with KF (0.60 mmol) and 18-crown-6 (0.60 mmol). The tube was evacuated at room temperature for 1 h with stirring before addition of a fluorenes (0.20 mmol), THF (10 mL) and an aryne precursor (0.30 mmol). The resulting mixture was stirred at room temperature for the period as specified in Table 1 or Scheme 2. The mixture was diluted with ethyl acetate, filtered through a Celite plug, washed three times with brine and dried over  $\text{MgSO}_4$ . Evaporation of the solvent followed by silica gel column chromatography (hexane/dichloromethane as an eluent) or gel permeation chromatography gave the corresponding product.

### 2-(9H-Fluoren-9-yl)phenyl isopropyl ketone (3aa).

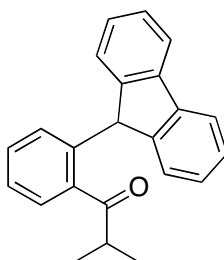

Isolated in 97% yield as a white solid: m.p. 140–142 °C;  $^1\text{H}$  NMR ( $\text{CDCl}_3$ )  $\delta$  1.35 (d,  $J = 6.5$  Hz, 6H), 3.57 (sept,  $J = 6.5$  Hz, 1H), 5.44 (s, 1H), 6.49 (d,  $J = 7.6$  Hz, 1H), 7.15 (t,  $J = 7.3$  Hz, 1H), 7.22–7.33 (m, 3H), 7.34–7.46 (m, 4H), 7.60 (d,  $J = 7.6$  Hz, 1H), 7.83 (d,  $J = 7.0$  Hz, 2H);  $^{13}\text{C}$  NMR ( $\text{CDCl}_3$ )  $\delta$  18.6, 39.4, 50.1, 119.7, 125.5, 126.3, 126.6, 127.2, 127.3, 129.4, 130.8, 140.2, 140.9, 141.1, 148.9, 209.5; HRMS Calcd for  $\text{C}_{23}\text{H}_{20}\text{O}$ :  $\text{M}^+$ , 312.1514. Found:  $m/z$  312.1518.

### 2-(9H-Fluoren-9-yl)benzophenone (3ab).

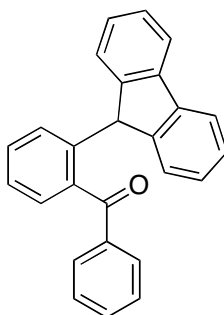

Isolated in 90% yield as a white solid: m.p. 170–172 °C;  $^1\text{H}$  NMR ( $\text{CDCl}_3$ )  $\delta$  5.18 (s, 1H), 6.45 (brs, 1H), 6.95–7.17 (m, 4H), 7.17–7.56 (m, 8H), 7.63 (d,  $J = 7.3$  Hz, 2H), 7.88 (brs, 2H);  $^{13}\text{C}$  NMR ( $\text{CDCl}_3$ )  $\delta$  50.3, 119.7, 120.1, 125.5, 125.9, 127.3, 128.2, 128.5, 128.9, 130.3, 130.6, 133.5, 137.8, 139.6, 140.8, 141.0, 148.3, 198.4; HRMS Calcd for  $\text{C}_{26}\text{H}_{18}\text{O}$ :  $\text{M}^+$ , 346.1358. Found:  $m/z$  346.1360.

**2-(9H-Fluoren-9-yl)-4'-methoxybenzophenone (3ac).**

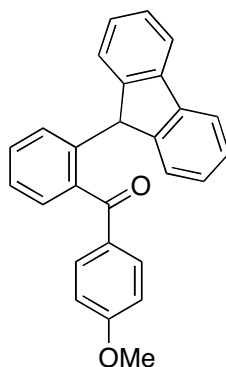

Isolated in 74% yield as a white solid: m.p. 155–159 °C;  $^1\text{H}$  NMR ( $\text{CDCl}_3$ )  $\delta$  3.90 (s, 3H), 5.29 (s, 1H), 6.58 (brs, 1H), 7.00 (d,  $J = 8.1$  Hz, 2H), 7.17–7.43 (m, 9H), 7.77 (d,  $J = 8.1$  Hz, 2H), 8.00 (brs, 2H);  $^{13}\text{C}$  NMR ( $\text{CDCl}_3$ )  $\delta$  50.5, 55.5, 113.7, 119.8, 125.5, 126.0, 127.2, 127.3, 127.8, 128.8, 130.2, 130.8, 132.7, 140.1, 140.5, 141.1, 148.3, 164.0, 197.1; HRMS Calcd for  $\text{C}_{27}\text{H}_{20}\text{O}_2$ :  $\text{M}^+$ , 376.1463. Found:  $m/z$  376.1468.

**2-(9H-Fluoren-9-yl)phenyl cyclopropyl ketone (3ad).**

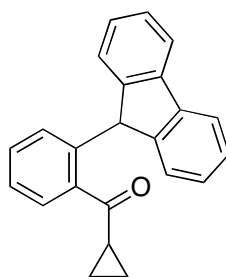

Isolated in 71% yield as a white solid: m.p. 139–142 °C;  $^1\text{H}$  NMR ( $\text{CDCl}_3$ )  $\delta$  1.19 (brs, 2H), 1.41 (brs, 2H), 2.70 (brs, 1H), 5.75 (s, 1H), 6.52 (brs, 1H), 7.10–7.48 (m, 8H), 7.76–7.94 (m, 3H);  $^{13}\text{C}$  NMR ( $\text{CDCl}_3$ )  $\delta$  12.5, 21.4, 49.8, 119.8, 125.5, 126.4, 127.1, 127.3, 127.9, 129.0, 131.1, 140.3, 141.0, 141.1, 148.6, 205.4; HRMS Calcd for  $\text{C}_{23}\text{H}_{18}\text{O}$ :  $\text{M}^+$ , 310.1358. Found:  $m/z$  310.1360.

**2-(9H-Fluoren-9-yl)phenyl cyclobutyl ketone (3ae).**

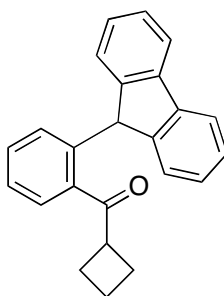

Isolated in 69% yield as a white solid: m.p. 116–119 °C;  $^1\text{H}$  NMR ( $\text{CDCl}_3$ )  $\delta$  1.80–2.22 (m, 2H), 2.22–2.66 (m, 4H), 4.02–4.30 (m, 1H), 5.85 (s, 1H), 6.52 (d,  $J = 7.2$  Hz, 1H), 7.08–7.52 (m, 8H), 7.62 (d,  $J = 7.6$  Hz, 1H), 7.83 (d,  $J = 7.6$  Hz, 2H);  $^{13}\text{C}$  NMR ( $\text{CDCl}_3$ )  $\delta$  17.8, 25.3, 44.8, 49.8, 119.8, 125.5, 126.3, 127.1, 127.3, 127.7, 129.5, 131.3, 138.3, 141.1, 141.5, 148.8, 205.8; HRMS Calcd for  $\text{C}_{24}\text{H}_{20}\text{O}$ :  $\text{M}^+$ , 324.1514. Found:  $m/z$  324.1528.

**2-(9H-Fluoren-9-yl)phenyl 2-thienyl ketone (3af).**

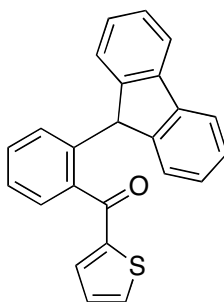

Isolated in 58% yield as a yellow solid: m.p. 186–190 °C;  $^1\text{H}$  NMR ( $\text{CDCl}_3$ )  $\delta$  5.40 (s, 1H), 6.59 (brs, 1H), 7.16–7.50 (m, 9H), 7.59 (d,  $J = 7.3$  Hz, 1H), 7.64–7.90 (m, 4H);  $^{13}\text{C}$  NMR ( $\text{CDCl}_3$ )  $\delta$  50.3, 119.7, 125.6, 125.9, 127.2, 127.3, 127.9, 128.3, 129.0, 130.7, 135.4, 135.7, 139.5, 140.6, 141.1, 145.3, 148.3, 190.2; HRMS Calcd for  $\text{C}_{24}\text{H}_{16}\text{OS}$ :  $\text{M}^+$ , 352.0922. Found:  $m/z$  352.0912.

**2-(9H-Fluoren-9-yl)-2'-methylbenzophenone (3ag).**

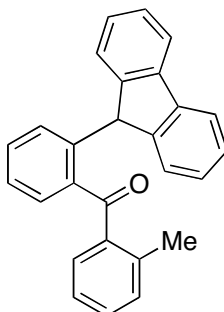

Isolated in 63% yield as a white solid: m.p. 124–127 °C;  $^1\text{H}$  NMR ( $\text{CDCl}_3$ )  $\delta$  2.63 (s, 3H), 5.59 (s, 1H), 6.55 (brs, 1H), 7.19–7.62 (m, 13H), 7.79 (d,  $J = 7.6$  Hz, 2H);  $^{13}\text{C}$  NMR ( $\text{CDCl}_3$ )  $\delta$  21.3, 50.0, 119.8, 125.5, 126.1, 127.2, 127.4, 129.1, 129.4, 129.5, 131.1, 131.4,

131.75, 131.81, 137.6, 138.4, 139.2, 140.5, 141.1, 148.6, 200.7; HRMS Calcd for  $C_{27}H_{20}O$ :  $M^+$ , 360.1514. Found:  $m/z$  360.1515.

**2-(9H-Fluoren-9-yl)phenyl *t*-butyl ketone (3ah).**

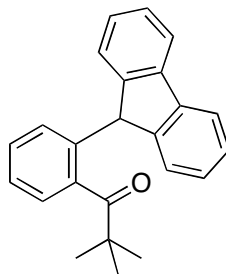

Isolated in 52% yield as a white solid: m.p. 168–171 °C;  $^1H$  NMR ( $CDCl_3$ )  $\delta$  1.43 (s, 9H), 4.81 (s, 1H), 6.42 (d,  $J = 8.1$  Hz, 1H), 7.08 (t,  $J = 6.9$  Hz, 1H), 7.15–7.51 (m, 8H), 7.80 (d,  $J = 7.6$  Hz, 2H);  $^{13}C$  NMR ( $CDCl_3$ )  $\delta$  27.6, 45.3, 51.4, 119.8, 124.5, 125.6, 125.8, 127.4, 127.5, 128.6, 129.2, 138.7, 141.0, 141.7, 148.3, 214.6; HRMS Calcd for  $C_{24}H_{22}O$ :  $M^+$ , 326.1671. Found:  $m/z$  326.1677.

**Ethyl 2-(9H-fluoren-9-yl)benzoate (3ai).**

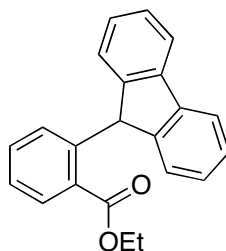

Isolated in 93% yield as a white solid: m.p. 86–89 °C;  $^1H$  NMR ( $CDCl_3$ )  $\delta$  1.48 (t,  $J = 7.1$  Hz, 3H), 4.52 (q,  $J = 7.1$  Hz, 2H), 6.23 (s, 1H), 6.52 (d,  $J = 7.5$  Hz, 1H), 7.15–7.41 (m, 8H), 7.84 (d,  $J = 7.5$  Hz, 2H), 8.00 (d,  $J = 7.8$  Hz, 1H);  $^{13}C$  NMR ( $CDCl_3$ )  $\delta$  14.3, 50.0, 61.3, 119.8, 125.5, 126.4, 127.1, 127.3, 129.0, 130.1, 131.1, 132.0, 141.1, 142.8, 148.4, 168.3; HRMS Calcd for  $C_{22}H_{18}O_2$ :  $M^+$ , 314.1307. Found:  $m/z$  314.1302.

**Isopropyl 2-(9H-fluoren-9-yl)benzoate (3aj).**

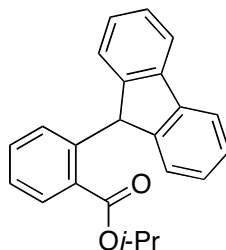

Isolated in 88% yield as a white solid: m.p. 76–78 °C; <sup>1</sup>H NMR (CDCl<sub>3</sub>) δ 1.47 (d, *J* = 6.2 Hz, 6H), 5.42 (sept, *J* = 6.2 Hz, 1H), 6.20 (s, 1H), 6.51 (d, *J* = 7.6 Hz, 1H), 7.05–7.45 (m, 8H), 7.84 (d, *J* = 7.6 Hz, 2H), 7.97 (d, *J* = 7.6 Hz, 1H); <sup>13</sup>C NMR (CDCl<sub>3</sub>) δ 22.0, 50.1, 68.9, 119.8, 125.5, 126.4, 127.1, 127.3, 128.9, 130.0, 131.7, 131.9, 141.1, 142.6, 148.5, 167.9; HRMS Calcd for C<sub>23</sub>H<sub>20</sub>O<sub>2</sub>: M<sup>+</sup>, 328.1463. Found: *m/z* 328.1465.

**3-(9*H*-Fluoren-9-yl)-2-naphthyl isopropyl ketone (3ba).**

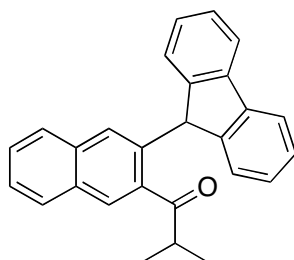

Isolated in 83% yield as a white solid: m.p. 125–128 °C; <sup>1</sup>H NMR (CDCl<sub>3</sub>) δ 1.38 (d, *J* = 6.9 Hz, 6H), 3.75 (sept, *J* = 6.9 Hz, 1H), 5.56 (s, 1H), 6.98 (s, 1H), 7.20–7.25 (m, 2H), 7.35–7.44 (m, 7H), 7.82–7.88 (m, 3H), 8.15 (s, 1H); <sup>13</sup>C NMR (CDCl<sub>3</sub>) δ 18.7, 39.5, 50.1, 119.8, 125.6, 126.3, 127.1, 127.3, 127.4, 127.5, 128.2, 128.5, 129.0, 131.1, 134.3, 137.9, 138.4, 141.0, 149.4, 209.4; HRMS Calcd for C<sub>27</sub>H<sub>22</sub>O: M<sup>+</sup>, 362.1671. Found: *m/z* 362.1663.

**6-(9*H*-Fluoren-9-yl)-5-indanyl isopropyl ketone (3ca).**

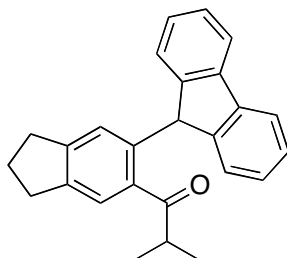

Isolated in 81% yield as a white solid: m.p. 127–131 °C; <sup>1</sup>H NMR (CDCl<sub>3</sub>) δ 1.34 (d, *J* = 6.9 Hz, 6H), 1.99 (quint, *J* = 7.2 Hz, 2H), 2.63 (t, *J* = 7.6 Hz, 2H), 2.90 (t, *J* = 7.3 Hz, 2H), 3.57 (sept, *J* = 6.9 Hz, 1H), 5.46 (s, 1H), 6.32 (s, 1H), 7.23–7.48 (m, 7H), 7.82 (d, *J* = 8.2 Hz, 2H); <sup>13</sup>C NMR (CDCl<sub>3</sub>) δ 18.8, 25.2, 32.4, 32.6, 39.2, 50.1, 119.7, 122.5, 124.9, 125.6, 127.0, 127.3, 128.3, 138.4, 141.1, 142.3, 147.7, 149.3, 209.4; HRMS Calcd for C<sub>26</sub>H<sub>24</sub>O: M<sup>+</sup>, 352.1827. Found: *m/z* 352.1835.

**3-(9*H*-Fluoren-9-yl)-5,6,7,8-tetrahydro-2-naphthyl isopropyl ketone (3da).**

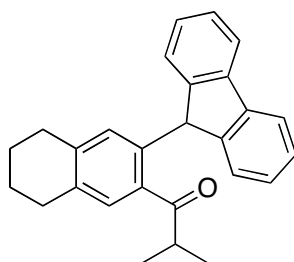

Isolated in 74% yield as a white solid: m.p. 118–121 °C;  $^1\text{H}$  NMR ( $\text{CDCl}_3$ )  $\delta$  1.32 (d,  $J$  = 6.9 Hz, 6H), 1.67–1.74 (m, 4H), 2.42 (t,  $J$  = 5.9 Hz, 2H), 2.77 (t,  $J$  = 5.9 Hz, 2H), 3.57 (sept,  $J$  = 6.9 Hz, 1H), 5.46 (s, 1H), 6.17 (s, 1H), 7.22–7.40 (m, 7H), 7.79–7.82 (m, 2H);  $^{13}\text{C}$  NMR ( $\text{CDCl}_3$ )  $\delta$  18.8, 22.7, 22.9, 29.01, 29.04, 39.0, 49.8, 119.6, 125.6, 127.0, 127.2, 127.6, 129.6, 135.2, 137.4, 137.9, 140.7, 141.0, 149.2, 209.4; HRMS Calcd for  $\text{C}_{27}\text{H}_{26}\text{O}$ :  $\text{M}^+$ , 366.1984. Found:  $m/z$  366.1991.

### 2-(9H-Fluoren-9-yl)-4,5-dimethylphenyl isopropyl ketone (3ea).

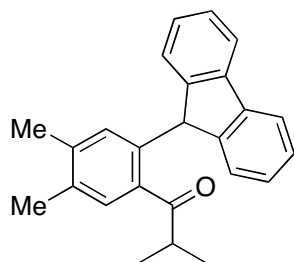

Isolated in 59% yield as a white solid: m.p. 112–117 °C;  $^1\text{H}$  NMR ( $\text{CDCl}_3$ )  $\delta$  1.33 (d,  $J$  = 6.6 Hz, 6H), 1.98 (s, 3H), 2.25 (s, 1H), 3.57 (sept,  $J$  = 6.6 Hz, 1H), 5.47 (s, 1H), 6.23 (s, 1H), 7.22–7.41 (m, 7H), 7.82 (d,  $J$  = 7.2 Hz, 2H);  $^{13}\text{C}$  NMR ( $\text{CDCl}_3$ )  $\delta$  18.8, 19.5, 19.6, 39.1, 49.8, 119.7, 125.5, 127.0, 127.3, 128.0, 130.2, 134.7, 137.7, 138.4, 140.1, 141.1, 149.1, 209.4; HRMS Calcd for  $\text{C}_{25}\text{H}_{24}\text{O}$ :  $\text{M}^+$ , 340.1827. Found:  $m/z$  340.1821.

### 2-(9H-Fluoren-9-yl)-1-naphthyl isopropyl ketone (3fa).

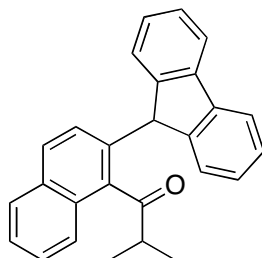

Isolated in 80% yield as a white solid: m.p. 143–145 °C;  $^1\text{H}$  NMR ( $\text{CDCl}_3$ )  $\delta$  1.47 (d,  $J$  = 6.9 Hz, 6H), 3.54 (sept,  $J$  = 6.9 Hz, 1H), 5.07 (s, 1H), 6.46 (d,  $J$  = 8.9 Hz, 1H), 7.26–7.61 (m, 9H), 7.73–7.89 (m, 4H);  $^{13}\text{C}$  NMR ( $\text{CDCl}_3$ )  $\delta$  18.3, 43.8, 51.3, 119.9, 124.8, 125.3, 125.4,



126.0, 126.8, 127.55, 127.63, 128.3, 129.5, 129.7, 132.3, 135.5, 139.2, 147.7, 213.6; Anal. Calcd for C<sub>27</sub>H<sub>22</sub>O: C, 89.47; H, 6.12. Found: C, 89.19; H, 6.46.

**2-(9H-Fluoren-9-yl)-6-methoxyphenyl isopropyl ketone (3ga).**

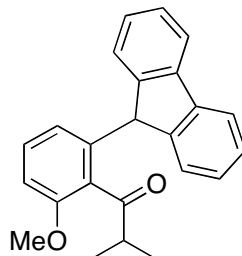

Isolated in 55% yield as a white solid: m.p. 159–162 °C; <sup>1</sup>H NMR (CDCl<sub>3</sub>) δ 1.33 (d, *J* = 6.9 Hz, 6H), 3.38 (sept, *J* = 6.9 Hz, 1H), 3.87 (s, 3H), 4.83 (s, 1H), 6.01 (d, *J* = 7.9 Hz, 1H), 6.75 (d, *J* = 8.2 Hz, 1H), 7.02 (t, *J* = 8.2 Hz, 1H), 7.26 (t, *J* = 7.3 Hz, 2H), 7.38 (t, *J* = 7.3 Hz, 2H), 7.46 (d, *J* = 7.3 Hz, 2H), 7.79 (d, *J* = 7.3 Hz, 2H); <sup>13</sup>C NMR (CDCl<sub>3</sub>) δ 18.1, 42.1, 50.8, 55.6, 108.6, 119.7, 120.4, 125.6, 127.3, 128.3, 130.2, 132.1, 140.3, 141.0, 148.2, 156.1, 211.8; Anal. Calcd for C<sub>24</sub>H<sub>22</sub>O<sub>2</sub>: C, 84.18; H, 6.48. Found: C, 83.96; H, 6.59.

**2-(9H-Fluoren-9-yl)-5-methylphenyl isopropyl ketone (3ha).**

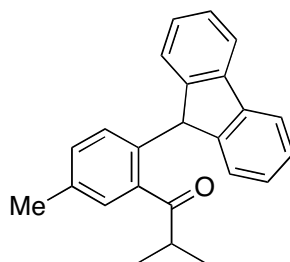

Isolated in 38% yield as a white solid: m.p. 98–101 °C; <sup>1</sup>H NMR (CDCl<sub>3</sub>) δ 1.33 (d, *J* = 6.6 Hz, 6H), 2.34 (s, 3H), 3.56 (sept, *J* = 6.8 Hz, 1H), 5.37 (s, 1H), 6.37 (d, *J* = 7.9 Hz, 1H), 6.96 (d, *J* = 7.9 Hz, 1H), 7.25 (t, *J* = 7.3 Hz, 2H), 7.34–7.42 (m, 5H), 7.82 (d, *J* = 7.3 Hz, 2H); <sup>13</sup>C NMR (CDCl<sub>3</sub>) δ 18.6, 21.0, 39.4, 49.9, 119.7, 125.5, 127.0, 127.1, 127.3, 129.2, 131.7, 135.9, 137.8, 140.3, 141.1, 149.0, 209.7; HRMS Calcd for C<sub>24</sub>H<sub>22</sub>O: M<sup>+</sup>, 326.1671. Found: *m/z* 326.1674.

**2-(9H-Fluoren-9-yl)-4-methylphenyl isopropyl ketone (3'ha).**

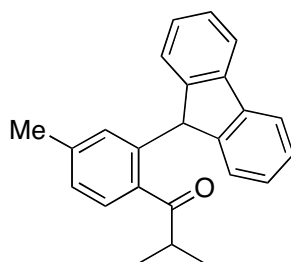

Isolated in 36% yield as a white solid: m.p. 106–111 °C;  $^1\text{H NMR}$  ( $\text{CDCl}_3$ )  $\delta$  1.33 (d,  $J$  = 6.6 Hz, 6H), 2.08 (s, 3H), 3.56 (sept,  $J$  = 6.6 Hz, 1H), 5.53 (s, 1H), 6.28 (s, 1H), 7.06 (d,  $J$  = 7.9 Hz, 1H), 7.26 (t,  $J$  = 7.2 Hz, 2H), 7.33–7.45 (m, 4H), 7.54 (d,  $J$  = 7.9 Hz, 1H), 7.82 (d,  $J$  = 7.2 Hz, 2H);  $^{13}\text{C NMR}$  ( $\text{CDCl}_3$ )  $\delta$  18.7, 21.2, 39.1, 50.0, 119.7, 125.5, 127.1, 127.2, 127.3, 129.7, 137.3, 141.1, 141.3, 149.0, 209.2; HRMS Calcd for  $\text{C}_{24}\text{H}_{22}\text{O}$ :  $\text{M}^+$ , 326.1671. Found:  $m/z$  326.1670.

**Ethyl 2-[2,7-bis(phenylethynyl)-9H-fluoren-9-yl]benzoate (3ak).**

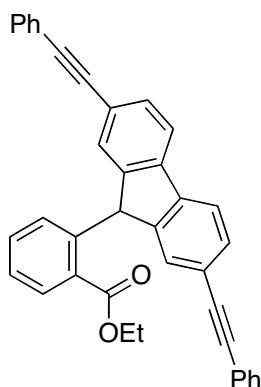

Isolated in 64% yield as a yellow solid: m.p. 147–150 °C;  $^1\text{H NMR}$  ( $\text{CDCl}_3$ )  $\delta$  1.52 (t,  $J$  = 7.3 Hz, 3H), 4.55 (q,  $J$  = 7.3 Hz, 2H), 6.33 (s, 1H), 6.57 (d,  $J$  = 7.7 Hz, 1H), 7.24–7.40 (m, 9H), 7.52–7.63 (m, 7H), 7.80 (d,  $J$  = 7.7 Hz, 2H), 8.05 (d,  $J$  = 7.7 Hz, 1H);  $^{13}\text{C NMR}$  ( $\text{CDCl}_3$ )  $\delta$  14.3, 49.7, 61.4, 89.9, 90.0, 120.1, 122.3, 123.2, 126.8, 128.1, 128.3, 128.7, 129.1, 130.3, 131.0, 131.5, 132.3, 140.6, 141.9, 148.9, 168.0; HRMS Calcd for  $\text{C}_{36}\text{H}_{26}\text{O}_2$ :  $\text{M}^+$ , 514.1933. Found:  $m/z$  514.1939.

**Ethyl 2-(2,7-di-*t*-butyl-9H-fluoren-9-yl)benzoate (3al).**

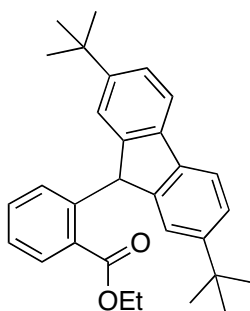

Isolated in 61% yield as a white solid: m.p. 166–171 °C; <sup>1</sup>H NMR (CDCl<sub>3</sub>) δ 1.30 (s, 18H), 1.47 (t, *J* = 7.3 Hz, 3H), 4.52 (q, *J* = 7.3 Hz, 2H), 6.09 (s, 1H), 6.55 (d, *J* = 7.9 Hz, 1H), 7.16–7.42 (m, 6H), 7.70 (d, *J* = 7.9 Hz, 2H), 7.97 (d, *J* = 6.3 Hz, 1H); <sup>13</sup>C NMR (CDCl<sub>3</sub>) δ 14.4, 31.5, 34.8, 50.3, 61.4, 119.0, 122.3, 124.2, 126.3, 129.1, 130.0, 131.3, 132.0, 138.6, 143.2, 148.4, 150.1, 168.7; HRMS Calcd for C<sub>30</sub>H<sub>34</sub>O: M<sup>+</sup>, 426.2559. Found: *m/z* 426.2552.

### Ethyl 2-(2,7-dibromo-9*H*-fluoren-9-yl)benzoate (3am).

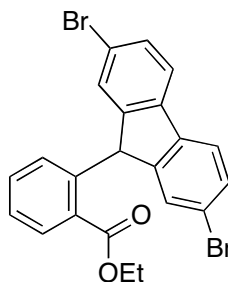

Isolated in 32% yield as a white solid: m.p. 135–138 °C; <sup>1</sup>H NMR (CDCl<sub>3</sub>) δ 1.47 (t, *J* = 7.3 Hz, 3H), 4.49 (q, *J* = 7.2 Hz, 2H), 6.23 (s, 1H), 6.47 (d, *J* = 7.6 Hz, 1H), 7.21–7.36 (m, 2H), 7.45–7.52 (m, 4H), 7.63 (d, *J* = 8.2 Hz, 2H), 8.01 (dd, *J* = 7.6, 1.9 Hz, 1H); <sup>13</sup>C NMR (CDCl<sub>3</sub>) δ 14.3, 49.9, 61.5, 121.2, 121.5, 127.1, 128.3, 129.0, 130.5, 130.6, 130.8, 132.4, 139.1, 141.3, 150.1, 167.8; Anal. Calcd for C<sub>22</sub>H<sub>16</sub>Br<sub>2</sub>O<sub>2</sub>: C, 55.96; H, 3.42. Found: C, 56.00; H, 3.54.

### References

- (1) Y. Himeshima, T. Sonoda and H. Kobayashi, *Chem. Lett.*, 1983, 1211.
- (2) H. Yoshida, T. Terayama, J. Ohshita and A. Kunai, *Chem. Commun.*, 2004, 1980.
- (3) H. Yoshida, S. Sugiura and A. Kunai, *Org. Lett.*, 2002, **4**, 2767.
- (4) D. Peña, D. Pérez, E. Guitián and L. Castedo, *J. Org. Chem.*, 2000, **65**, 6944.
- (5) D. Peña, D. Pérez, E. Guitián and L. Castedo, *J. Am. Chem. Soc.*, 1999, **121**, 5827.
- (6) E. Yoshikawa, K. V. Radhakrishnan and Y. Yamamoto, *J. Am. Chem. Soc.*, 2000, **122**, 7280.
- (7) W. S. Matthews, J. E. Bares, J. E. Bartmess, F. G. Bordwell, F. J. Cornforth, G. E. Drucker, Z. Margolin, R. J. McCallum, G. J. McCollum and N. R. Vanier, *J. Am. Chem. Soc.*, 1975, **97**, 7006.
- (8) M. Ranger and M. Leclerc, *Macromolecules*, 1999, **32**, 3306.
- (9) E. Birckner, U. -W. Grummt, A. H. Göller, T. Pautzsch, D. A. M. Egbe, M. Al-Higari and E. Klemm, *J. Phys. Chem. A*, 2001, **105**, 10307.



08-JUN-06 23:22:54

OFFICE SAVING

OBNUC 13C

EXMOD BCM

CFR 67.80 MHz

OBSET 135.00 MHz

CBF IN 5200.0 Hz

POINT 32768

FREQ 20000.0 Hz

SCANS 10556

ACQTM 0.819 sec

PD 2.181 sec

PW1 5.0 us

IRNUC 1H

CTEMP 28.6 C

SLVNT CDCL3

EXREF 77.00 ppm

BF 1.22 Hz

RGAIN 24

OPERATOR :

Supplemental Material (ESI) for Chemical Communications  
This journal is (c) The Royal Society of Chemistry 2008

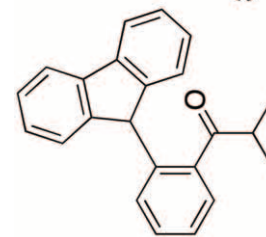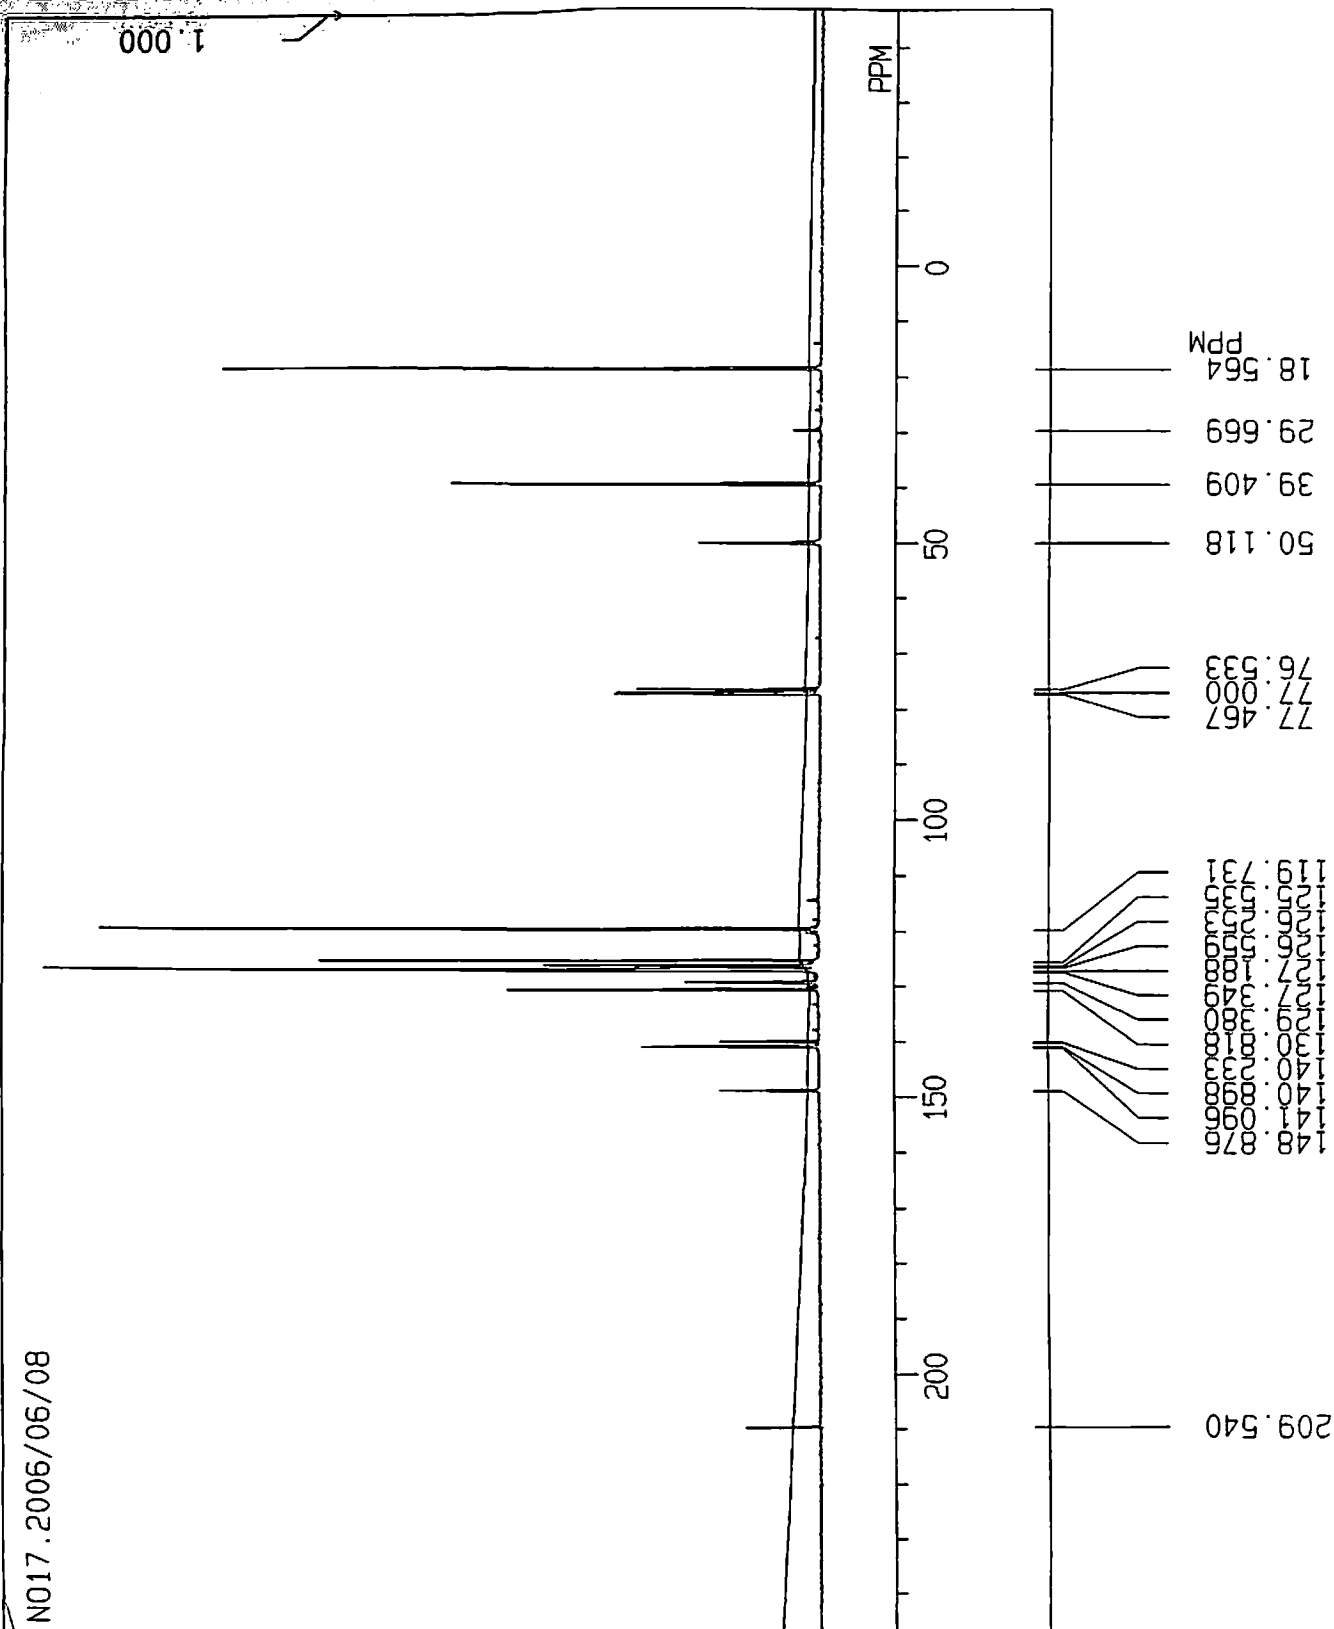

N017.2006/06/08

02-FEB-07 16: 15: 14

Supplementary Material (ESI) for Chemical Communications  
This journal is © The Royal Society of Chemistry 2008

DFILE Q1H  
OBNUC 1H  
EXMOD NON  
OFR 270.05 MHz  
OBSET 112.06 MHz  
OBFIN 5800.0 MHz  
POINT 32758  
FREQU 5405.4 MHz  
SCANS 16  
ACQTM 3.03 sec  
PD 3.96 sec  
PW1 5.00 us  
IRNUC 1H  
CTEMP 18.9 C  
SLVNT CDCL3  
EXREF 7.05 ppm  
BF 0.16 Hz  
RGAIN 14  
OPERATOR :

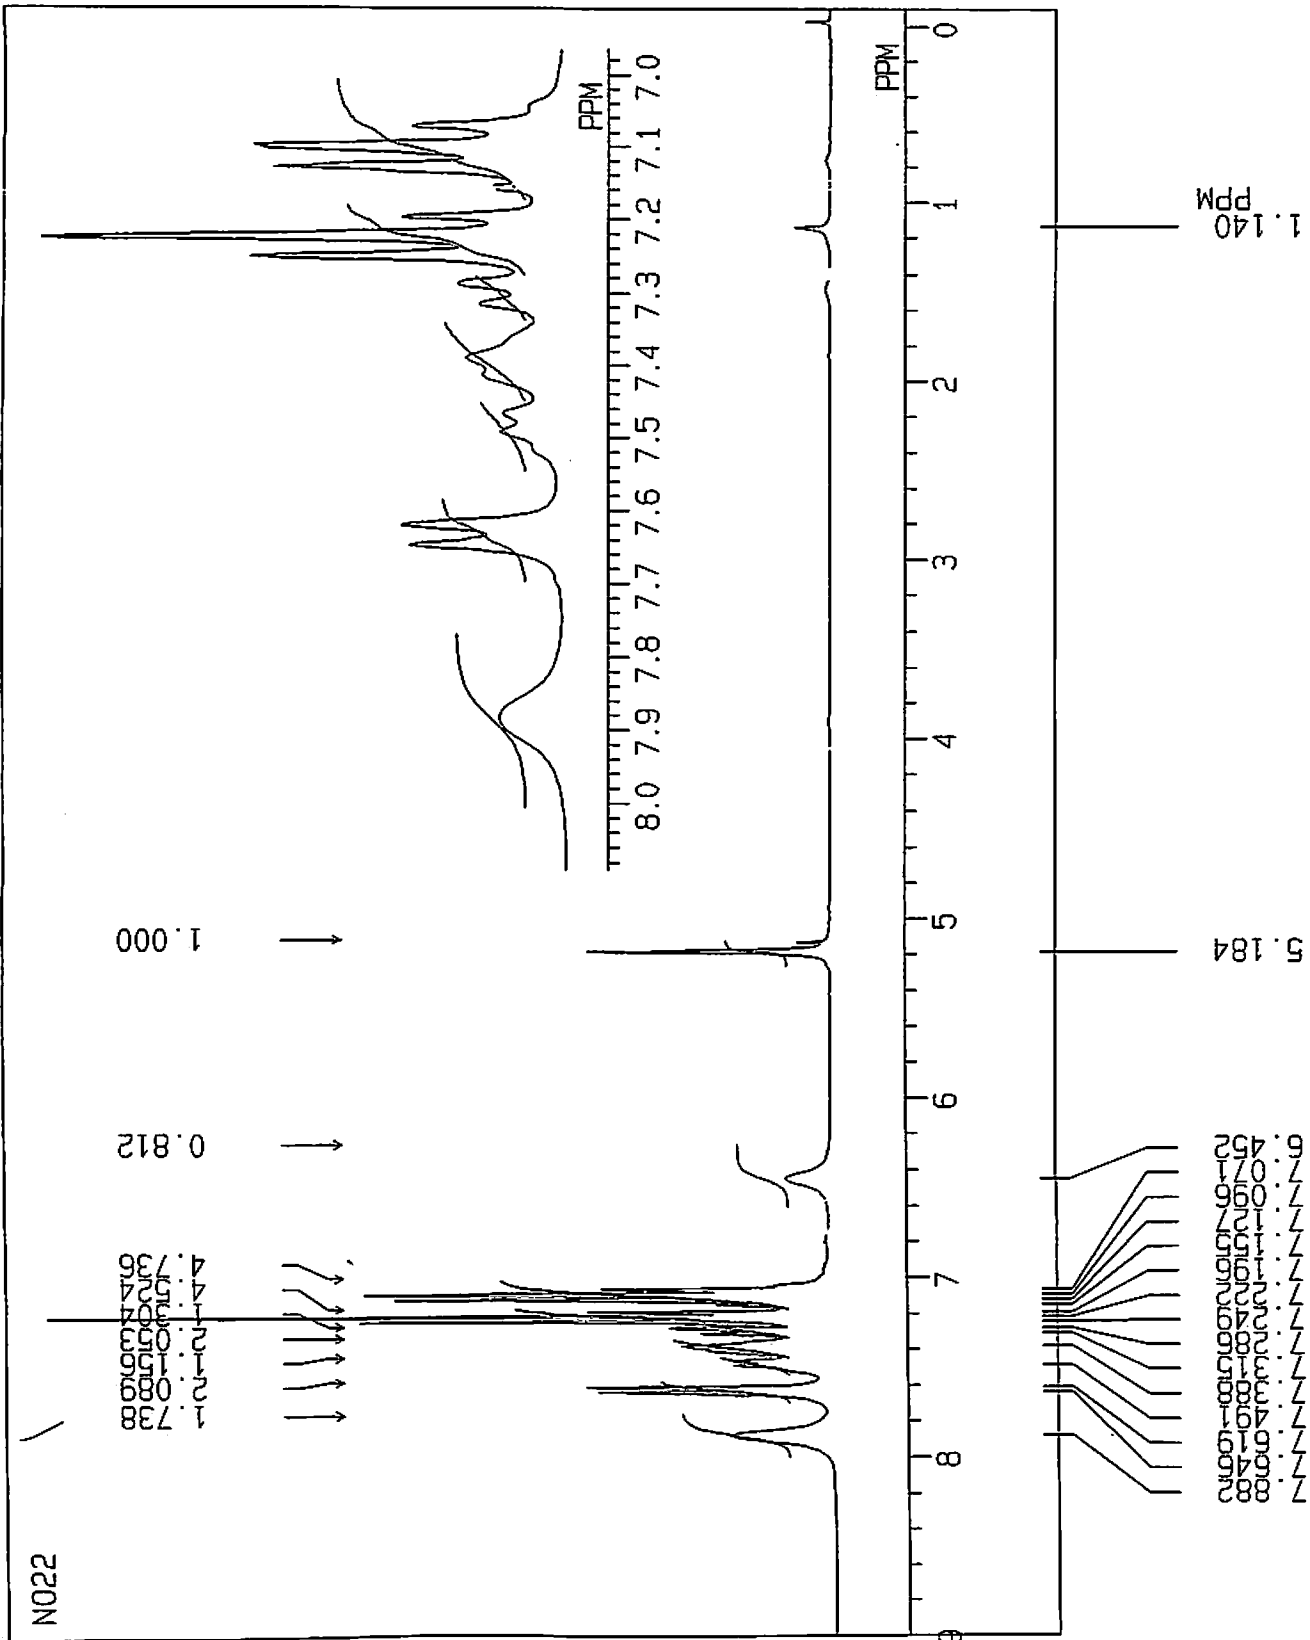

03-FEB-07 09:09:48

DFILE Q1H

OBNUC 13C

EXMOD BCM

OFR 67.80 MHz

OBSET 135.00 MHz

OBFIN 5200.0 Hz

POINT 32768

FREQ 20000.0 Hz

SCANS 2456

ACGTM 0.819 sec

PD 2.181 sec

PW1 5.00 us

IRNUC 1H

CTEMP 28.6 C

SLVNT CDCL3

EXREF 77.00 ppm

BF 1.22 Hz

RGAIN 24

OPERATOR

Supplemental Material (ESI) for Chemical Communications  
This journal is (c) The Royal Society of Chemistry 2008

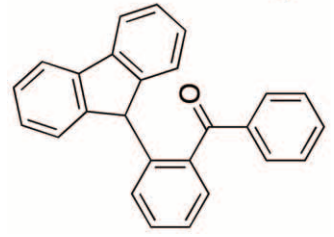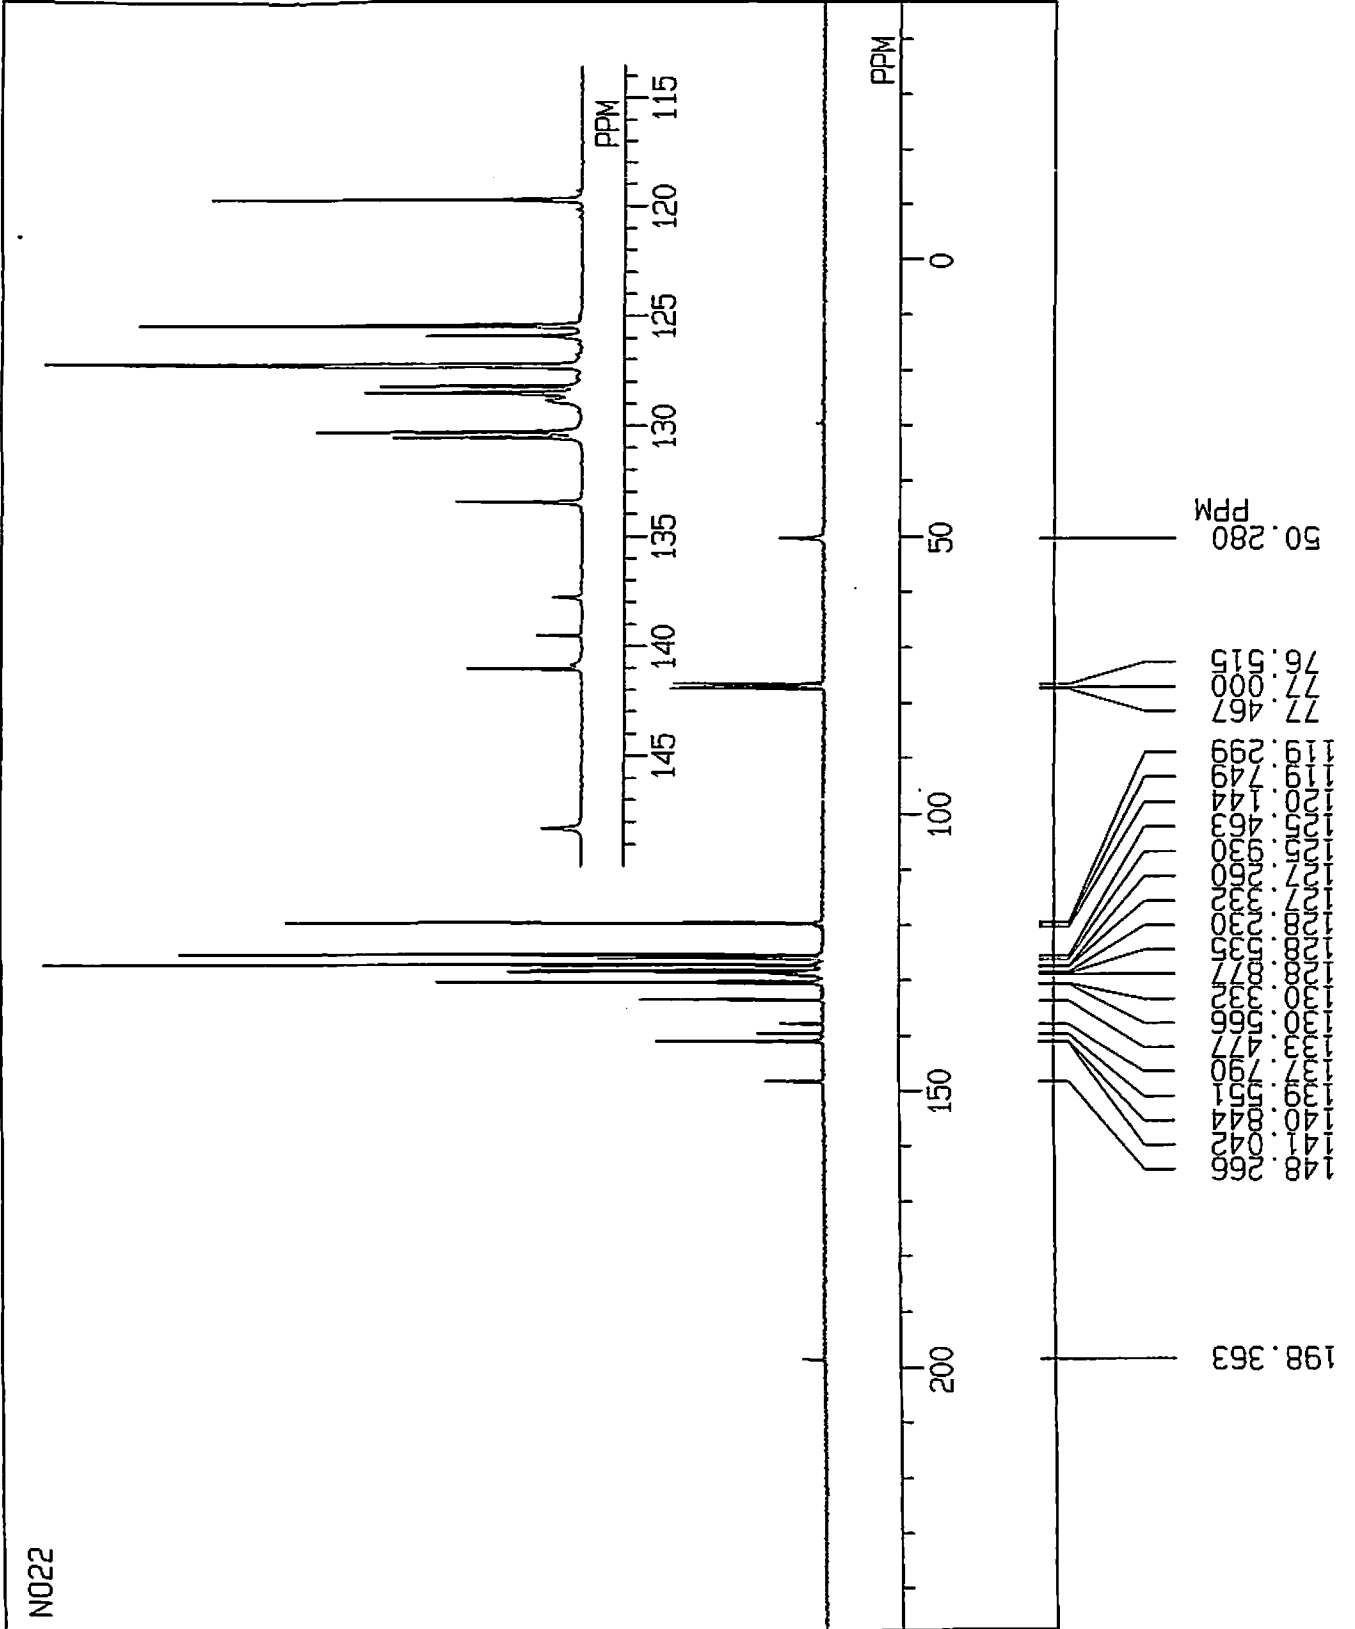

14-SEP-06 17: 14: 54

Supplemental Material (ESI) for Chemical Communications  
 This journal is © The Royal Society of Chemistry 2008

DFILE SAVING  
 OBNUC 1H  
 EXMOD NON  
 OFR 270.05 MHz  
 OBSET 112.00 MHz  
 OBFIN 5800.0 MHz  
 POINT 32760  
 FREQU 5405.8 MHz  
 SCANS 16  
 ACQTM 3.03 sec  
 PD 3.96 sec  
 PW1 5.0 μs  
 IRNUC 1H  
 CTEMP 20.4 C  
 SLVNT CDCL3  
 EXREF 7.26 ppm  
 BF 0.16 Hz  
 RGAIN 14  
 OPERATOR :

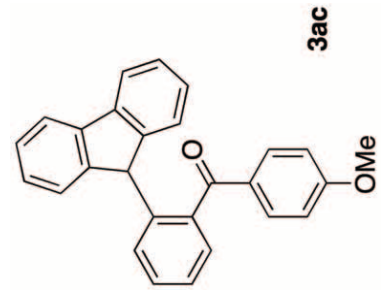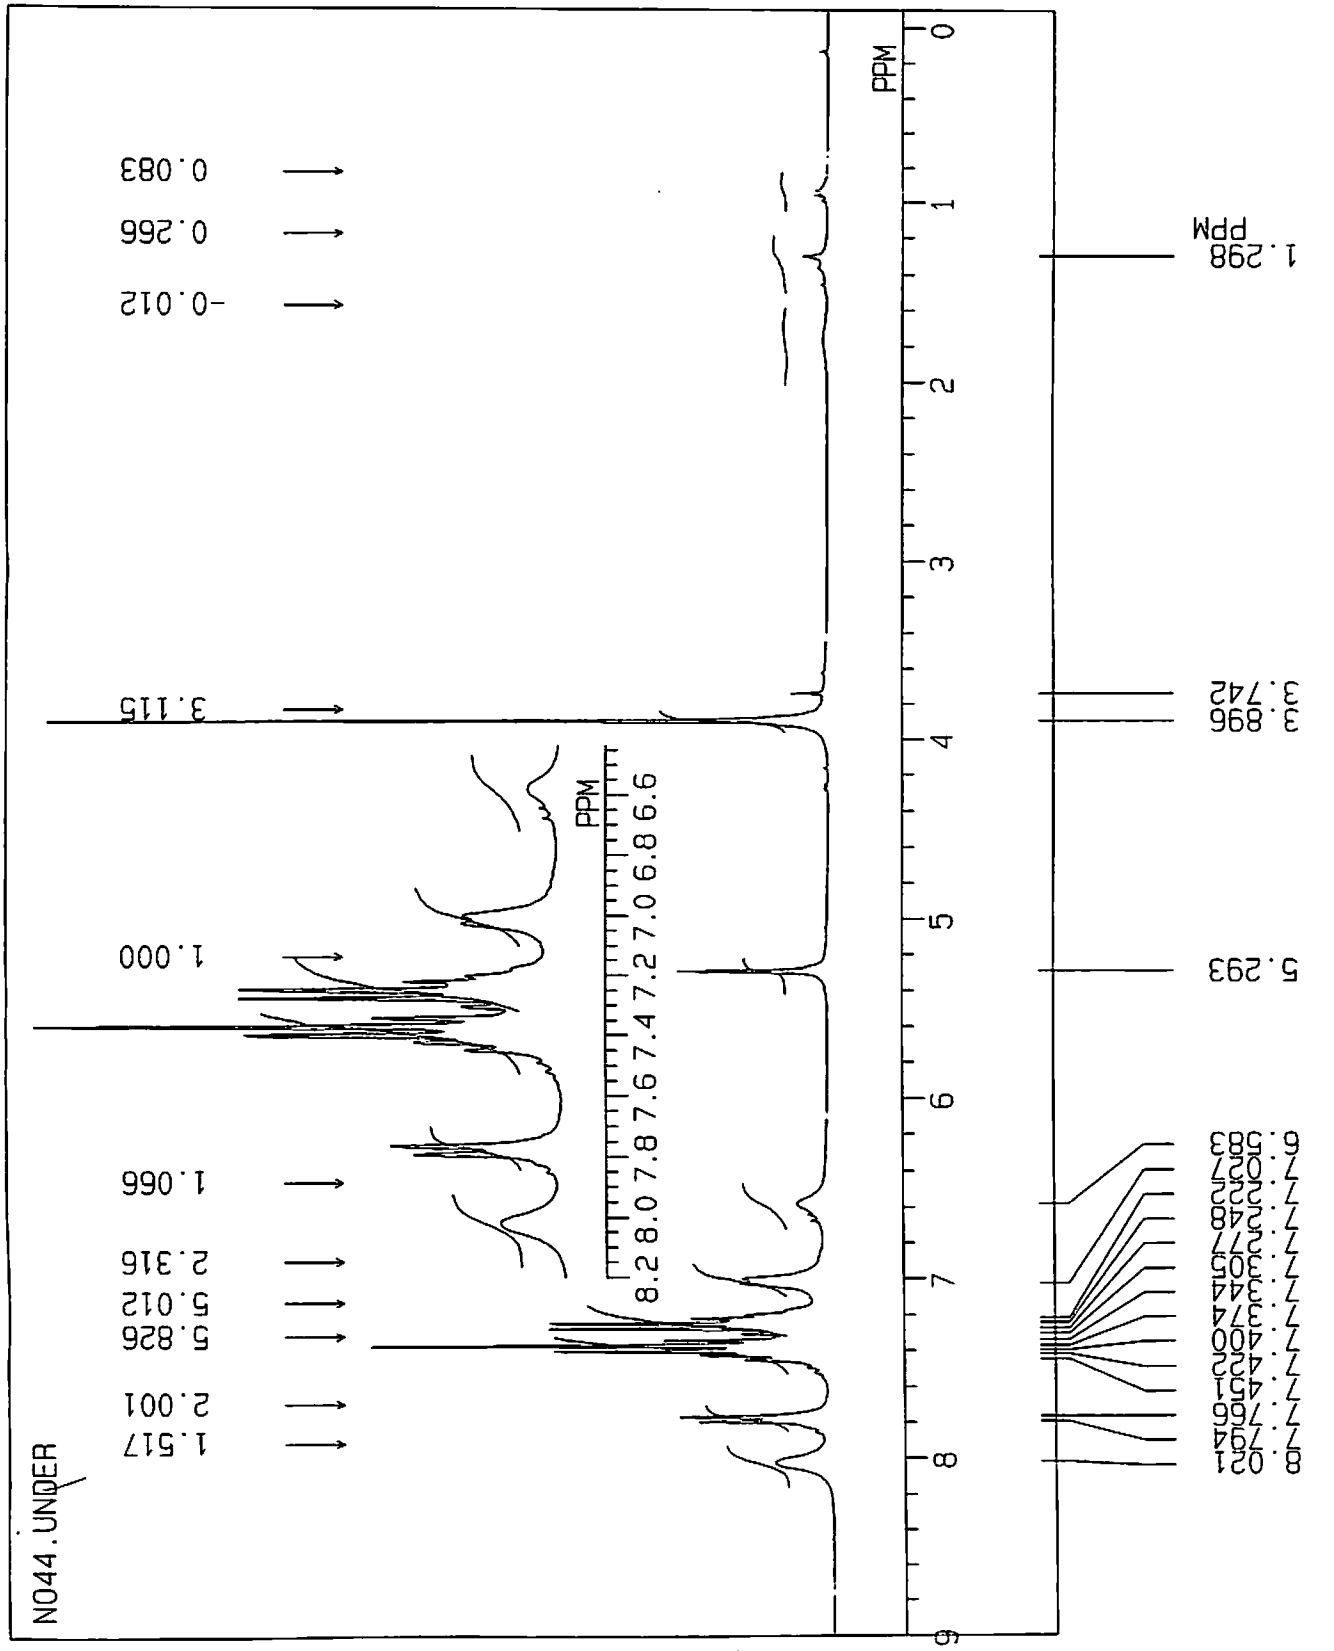



.\_DEFAULT.ALS  
 Wed Feb 28 15:44:46 2007  
 13C  
 BCM  
 67.80 MHz  
 135.00 KHz  
 5200.00 Hz  
 32768  
 18306.64 Hz  
 3357  
 1.7500 sec  
 1.2100 sec  
 3.50 usec  
 20.7 c  
 CDCL<sub>3</sub>  
 77.00 ppm  
 0.12 Hz  
 28  
 1H  
 IRNUC  
 CTEMP  
 SLVNT  
 EXREF  
 B1  
 RGAIN

Supplementary Material (ESI) for Chemical Communications  
 This journal is (c) The Royal Society of Chemistry 2008

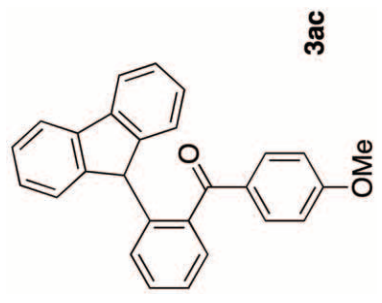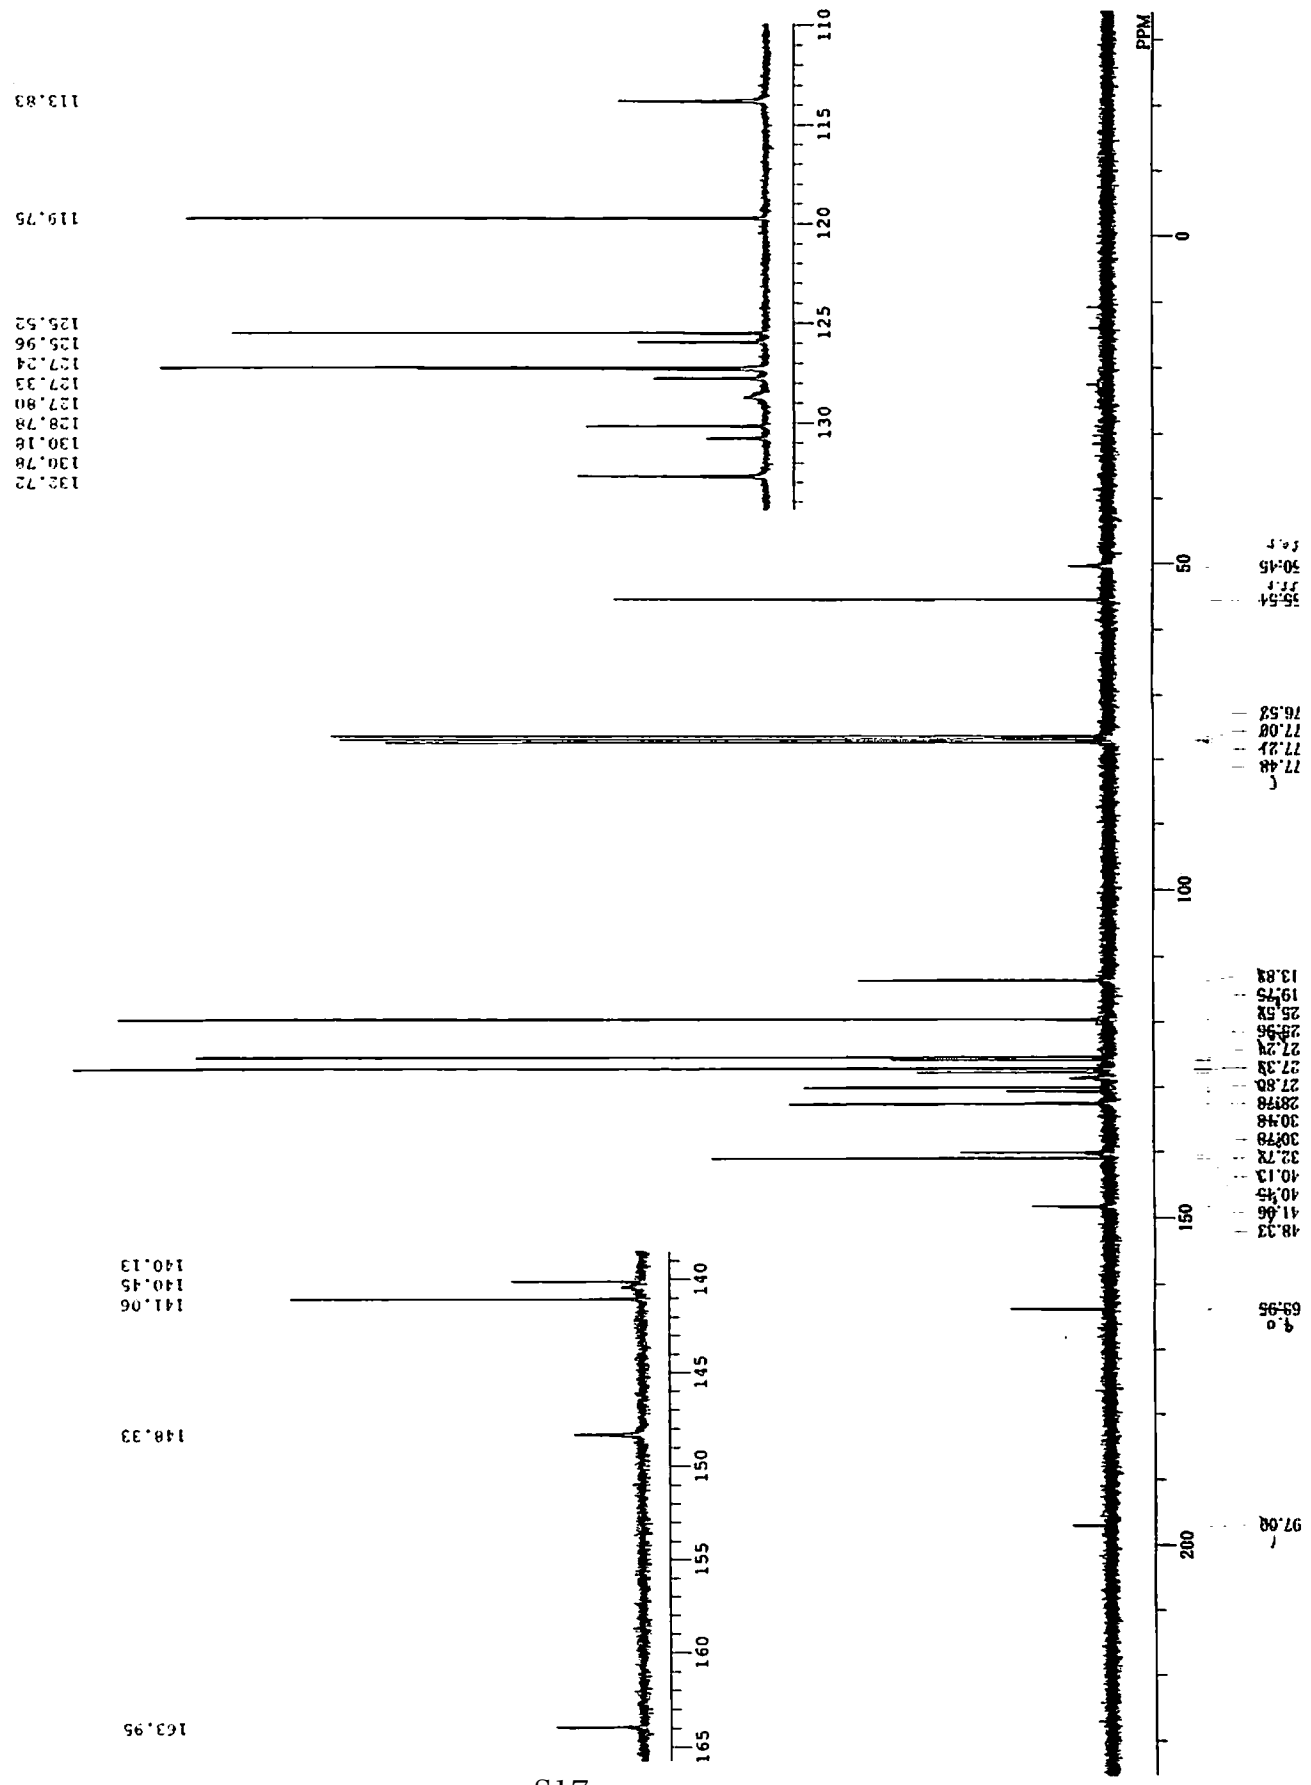

16-SEP-06 17:22:28

Supplementary Material (ESI) for Chemical Communications  
This journal is (c) The Royal Society of Chemistry 2008

DFILE SAVING

OBNUC 1H

EXMOD NON

OFR 270.05 MHz

OBSET 112.00 MHz

OBFIN 5800.0 Hz

POINT 32768

FREQU 5405.4 Hz

SCANS 16

ACQTM 3.031 sec

PD 3.969 sec

PW1 5.00 us

IRNUC 1H

CTEMP 22.3 C

SLVNT CDCL3

EXREF 7.26 ppm

BF 0.16 Hz

RGAIN 15

OPERATOR :

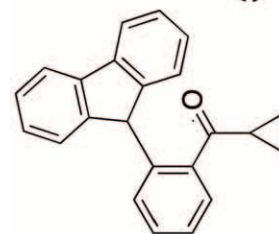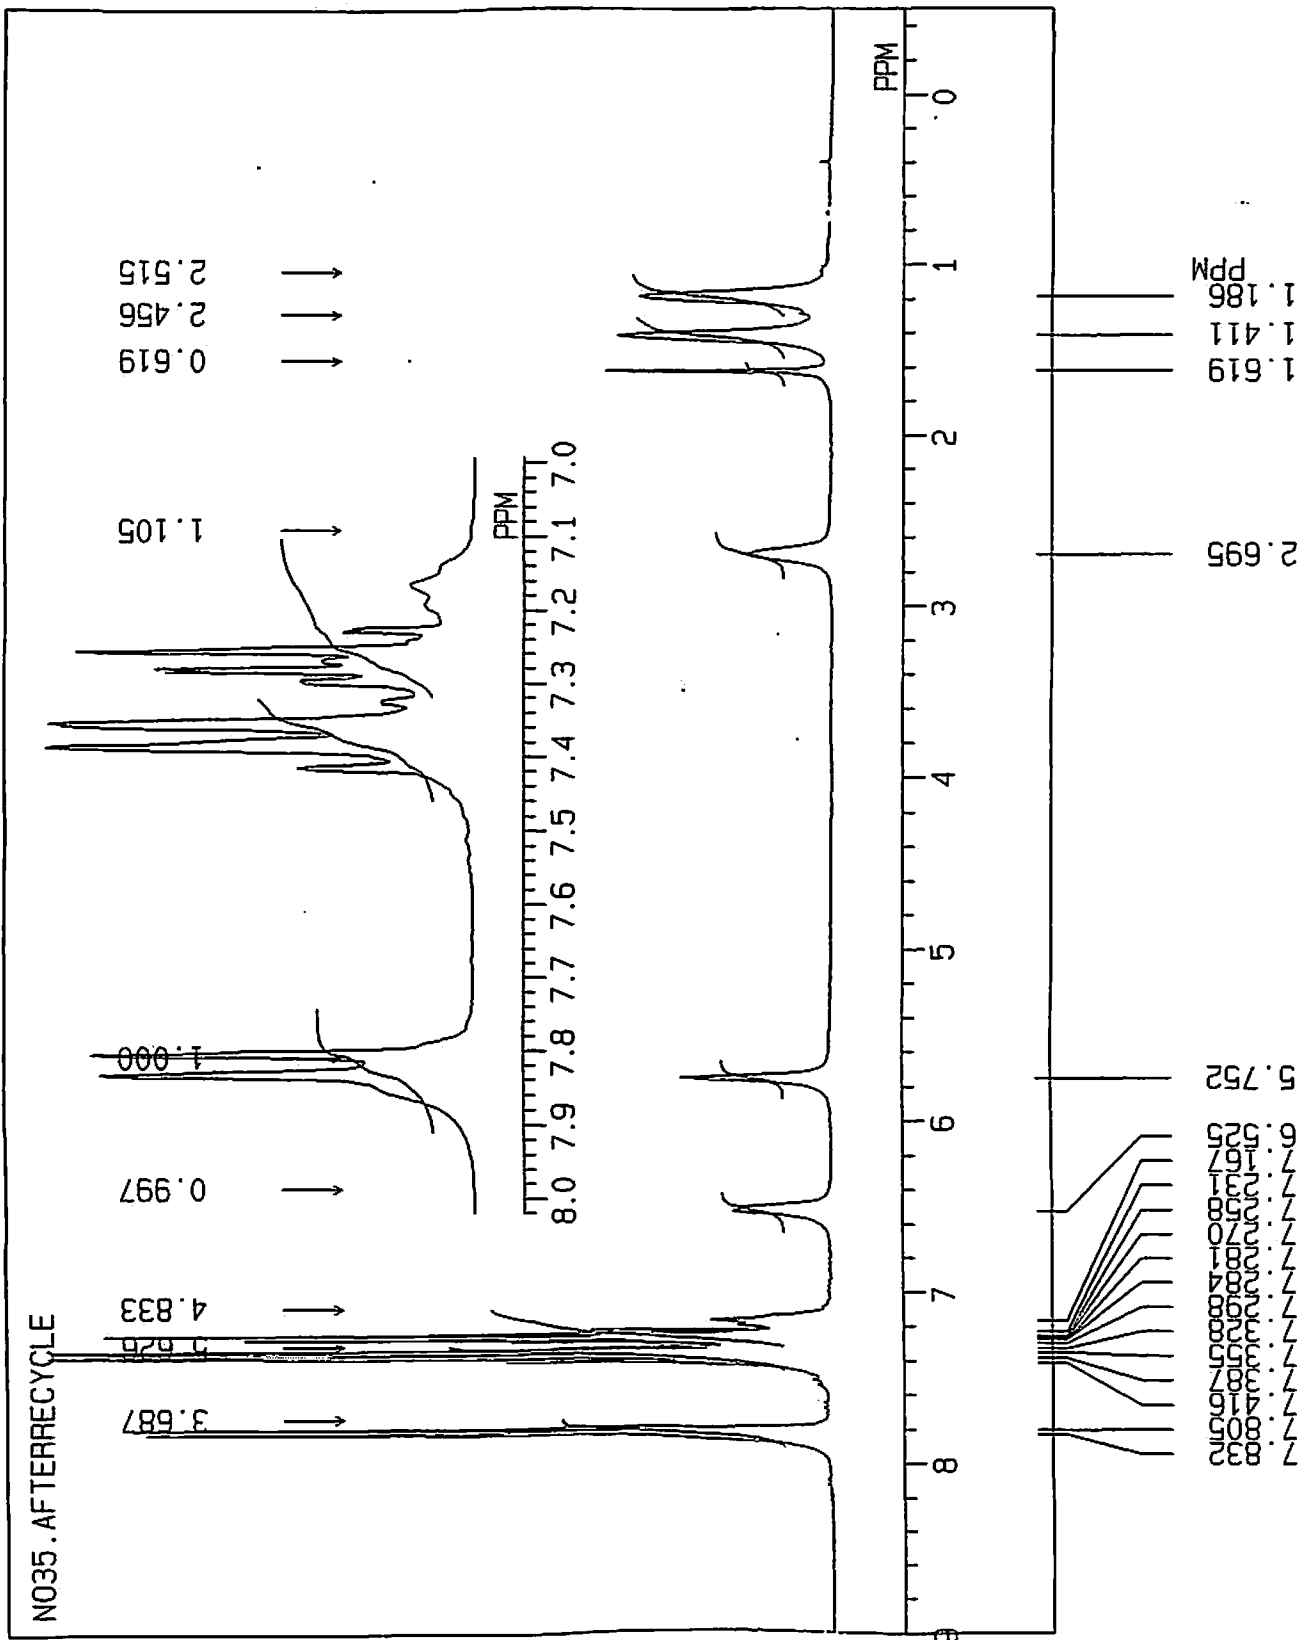

25-SEP-06 17:14:08

DFILE SAVING

OBNUC 13C

EXMOD BCM

OFR 67.80 MHz

OBSET 135.00 KHz

OBFIN 5200.0 Hz

POINT 32768

FREQ 20000.0 Hz

SCANS 2143

ACGTM 0.819 sec

PD 2.181 sec

PW1 5.0 us

IRNUC 1H

CTEMP 20.8 C

SLVNT C6D6

EXREF 77.00 ppm

BF 1.22 Hz

RGAIN 28

OPERATOR :

N035

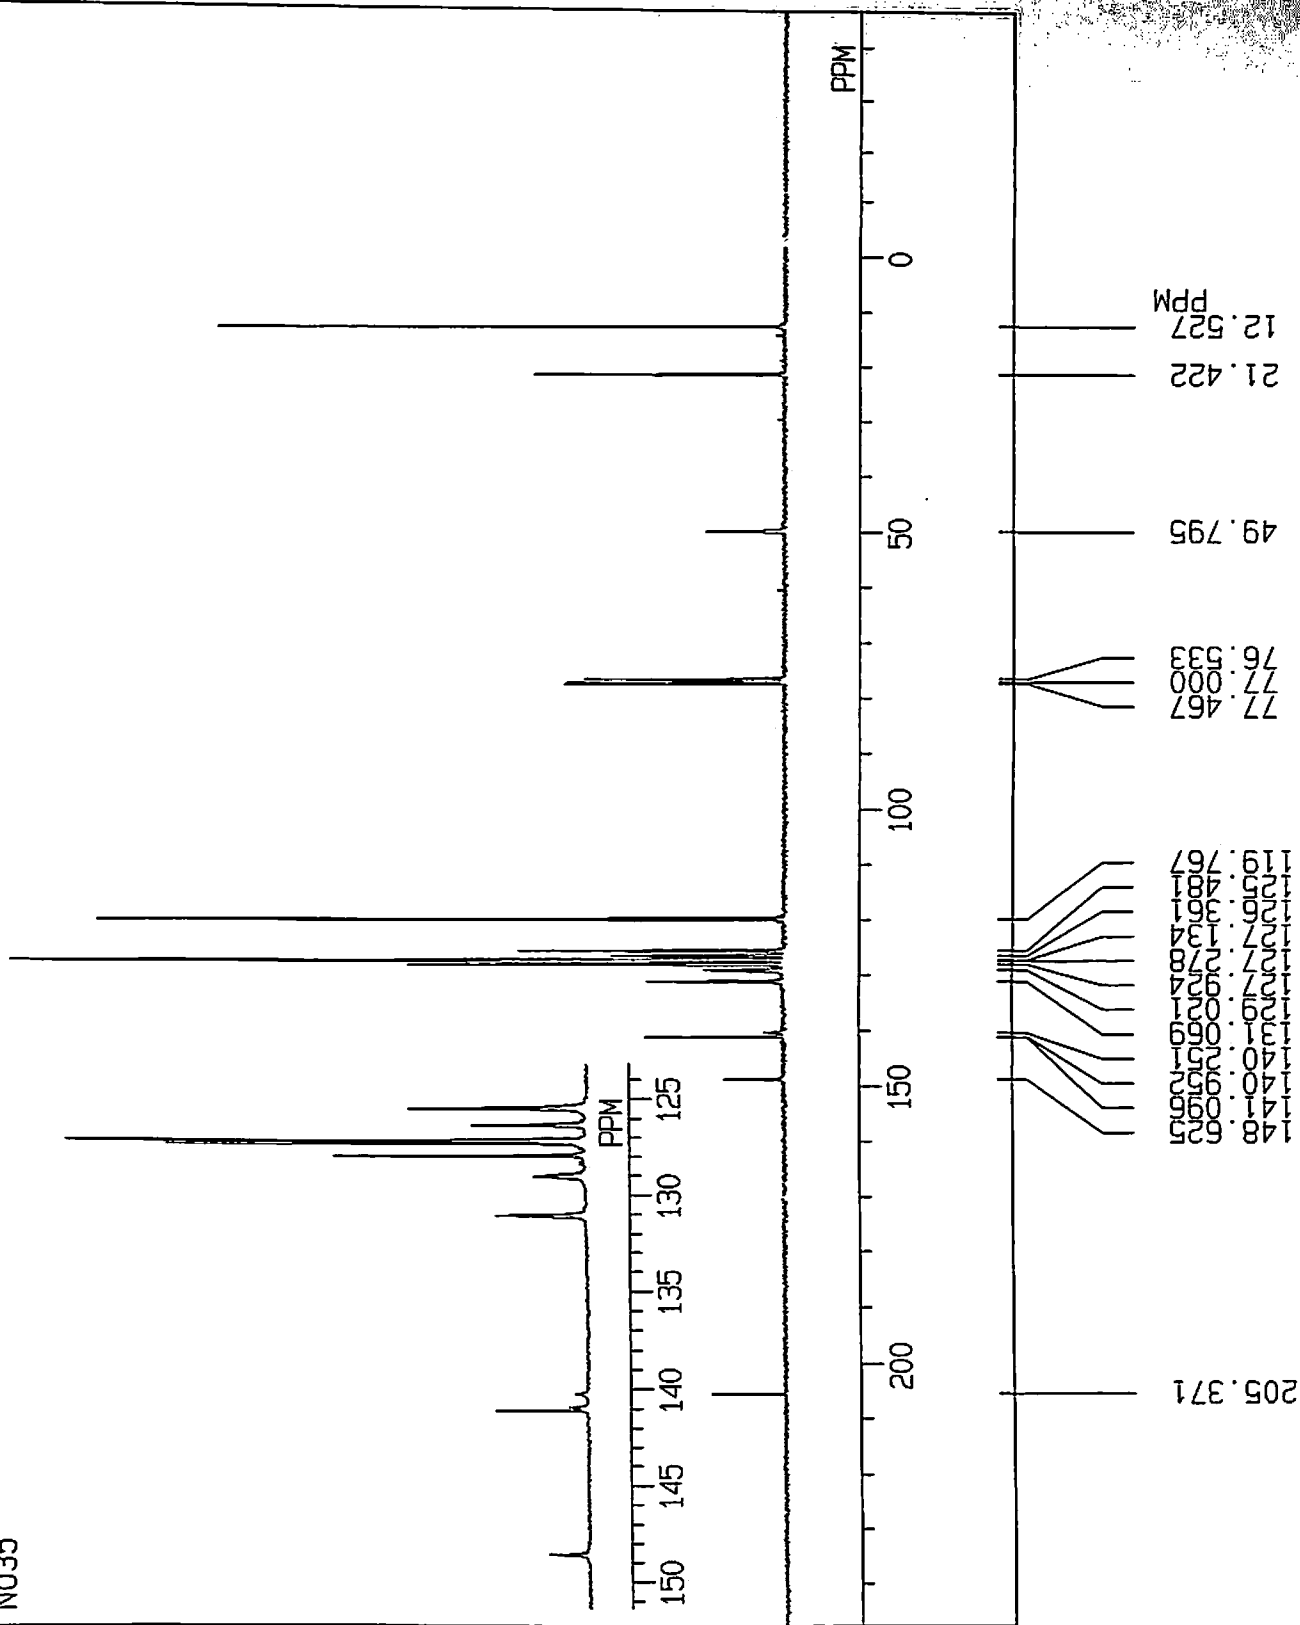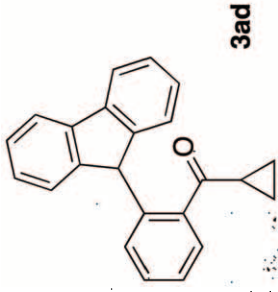

Supplemental Material (ESI) for *Chemical Communications*  
 This journal is © the Royal Society of Chemistry 2008

3ae

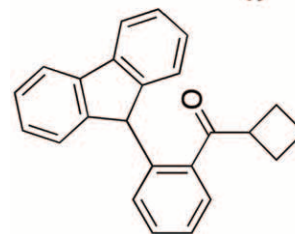

07-FEB-07 19:57:23

DFILE 01H  
 OBNUC 1H  
 EXMOD NOM  
 OFR  
 OBSET  
 OBFIN  
 POINT  
 FREOU  
 SCANS  
 ACO TM  
 PD  
 PW1  
 IRNUC 1H  
 CTEMP  
 SLVNT COCL3  
 EXREF  
 BF  
 RGAIN 15  
 OPERATOR :

270.05 MHz  
 112.00 kHz  
 5800.0 Hz  
 32768  
 5405.4 Hz  
 16  
 3.031 sec  
 3.969 sec  
 5.0 us  
 15.5 c  
 7.26 ppm  
 0.16 Hz

N652

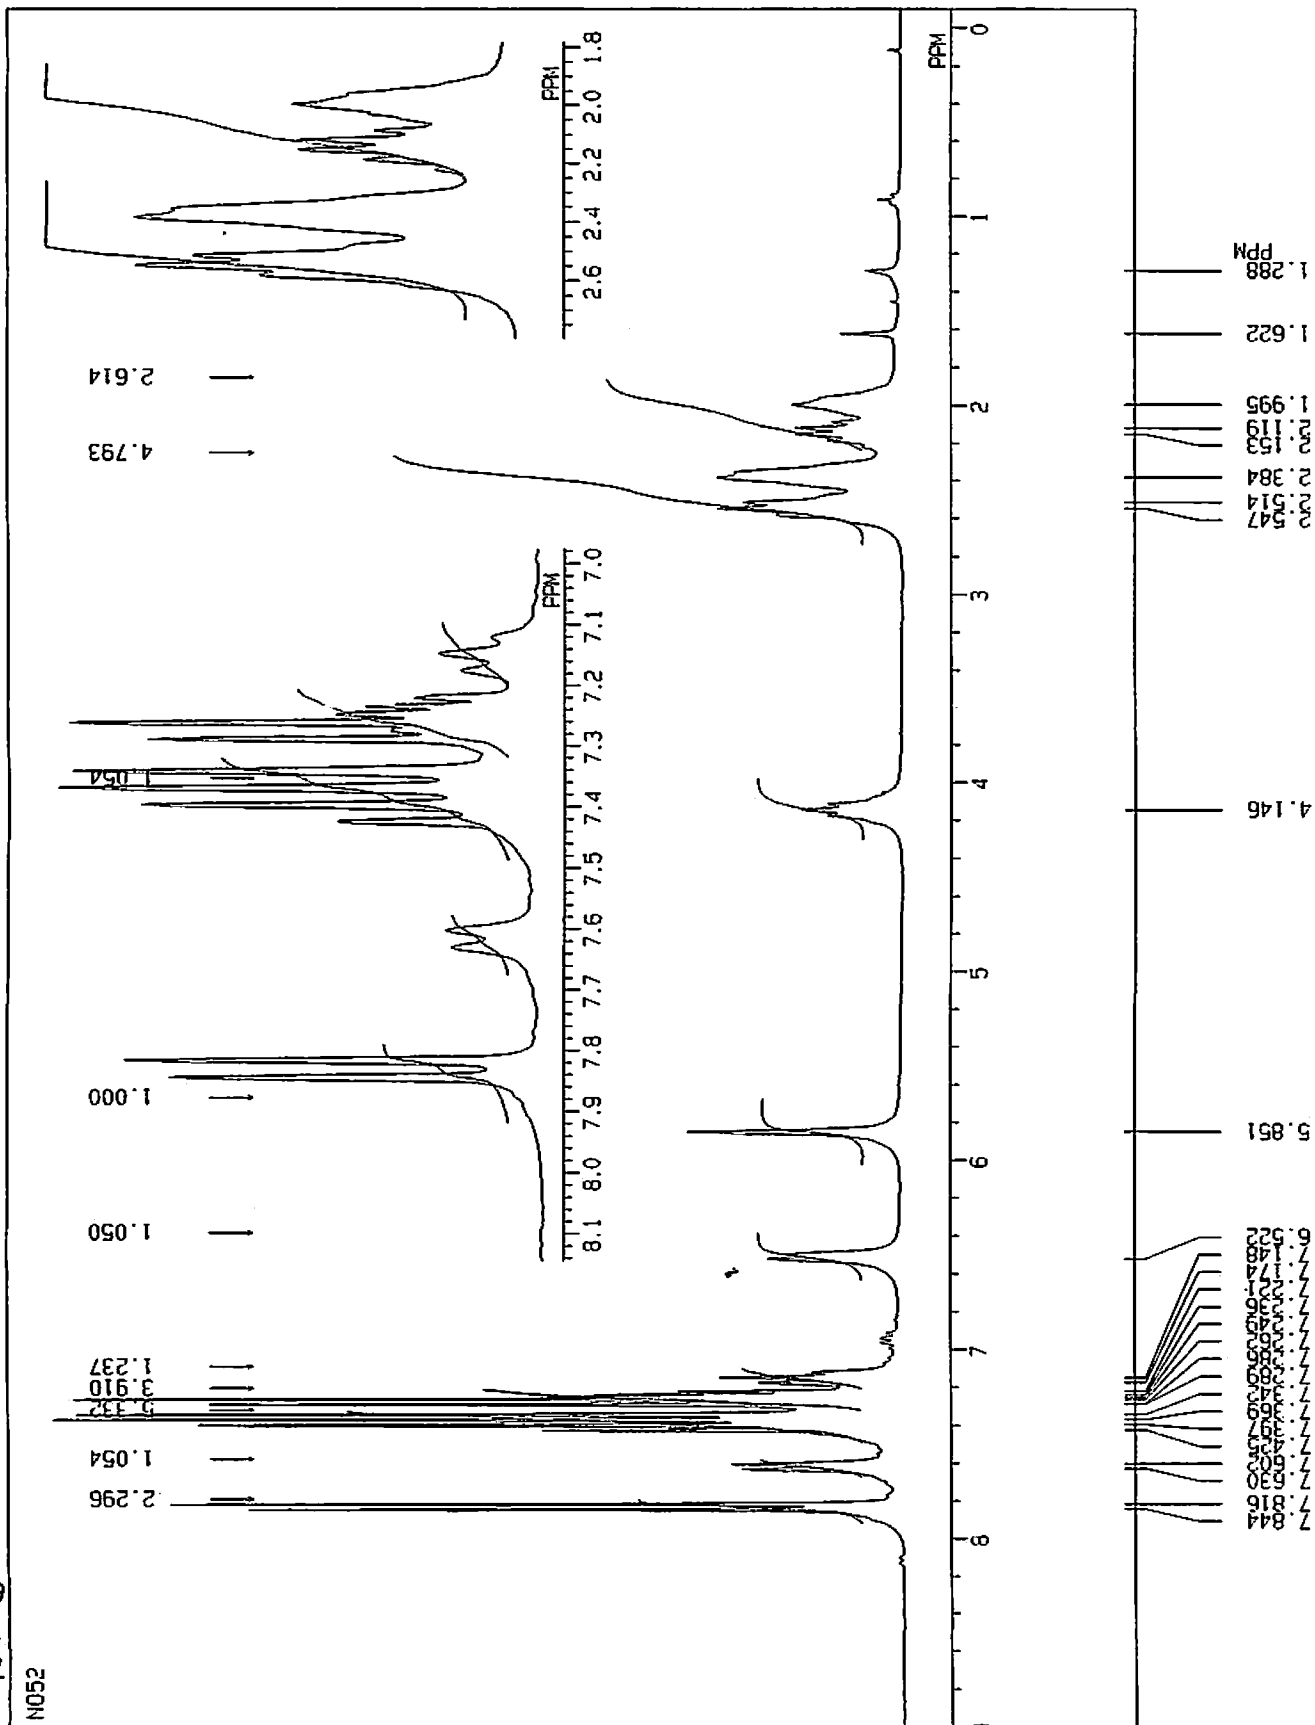

No 525

07-FEB-07 14:25:05

DFILE 01H  
 OBNUC 13C  
 EXMOD BCM  
 OFR  
 OBSET 67.80 MHz  
 OBFIN 135.00 kHz  
 POINT 5200.0 Hz  
 FREQU 32768  
 SCANS 20000.0 Hz  
 ACQTM 1807  
 PD 0.819 sec  
 PW1 2.181 sec  
 IRNUC 1H  
 CTEMP 28.6 c  
 SLVNT CDCL3  
 EXREF 77.00 ppm  
 BF 1.22 Hz  
 RGAIN 24  
 OPERATOR :

Supplementary Material (ESI) for Chemical Communications  
 This material is The Royal Society of Chemistry 2008

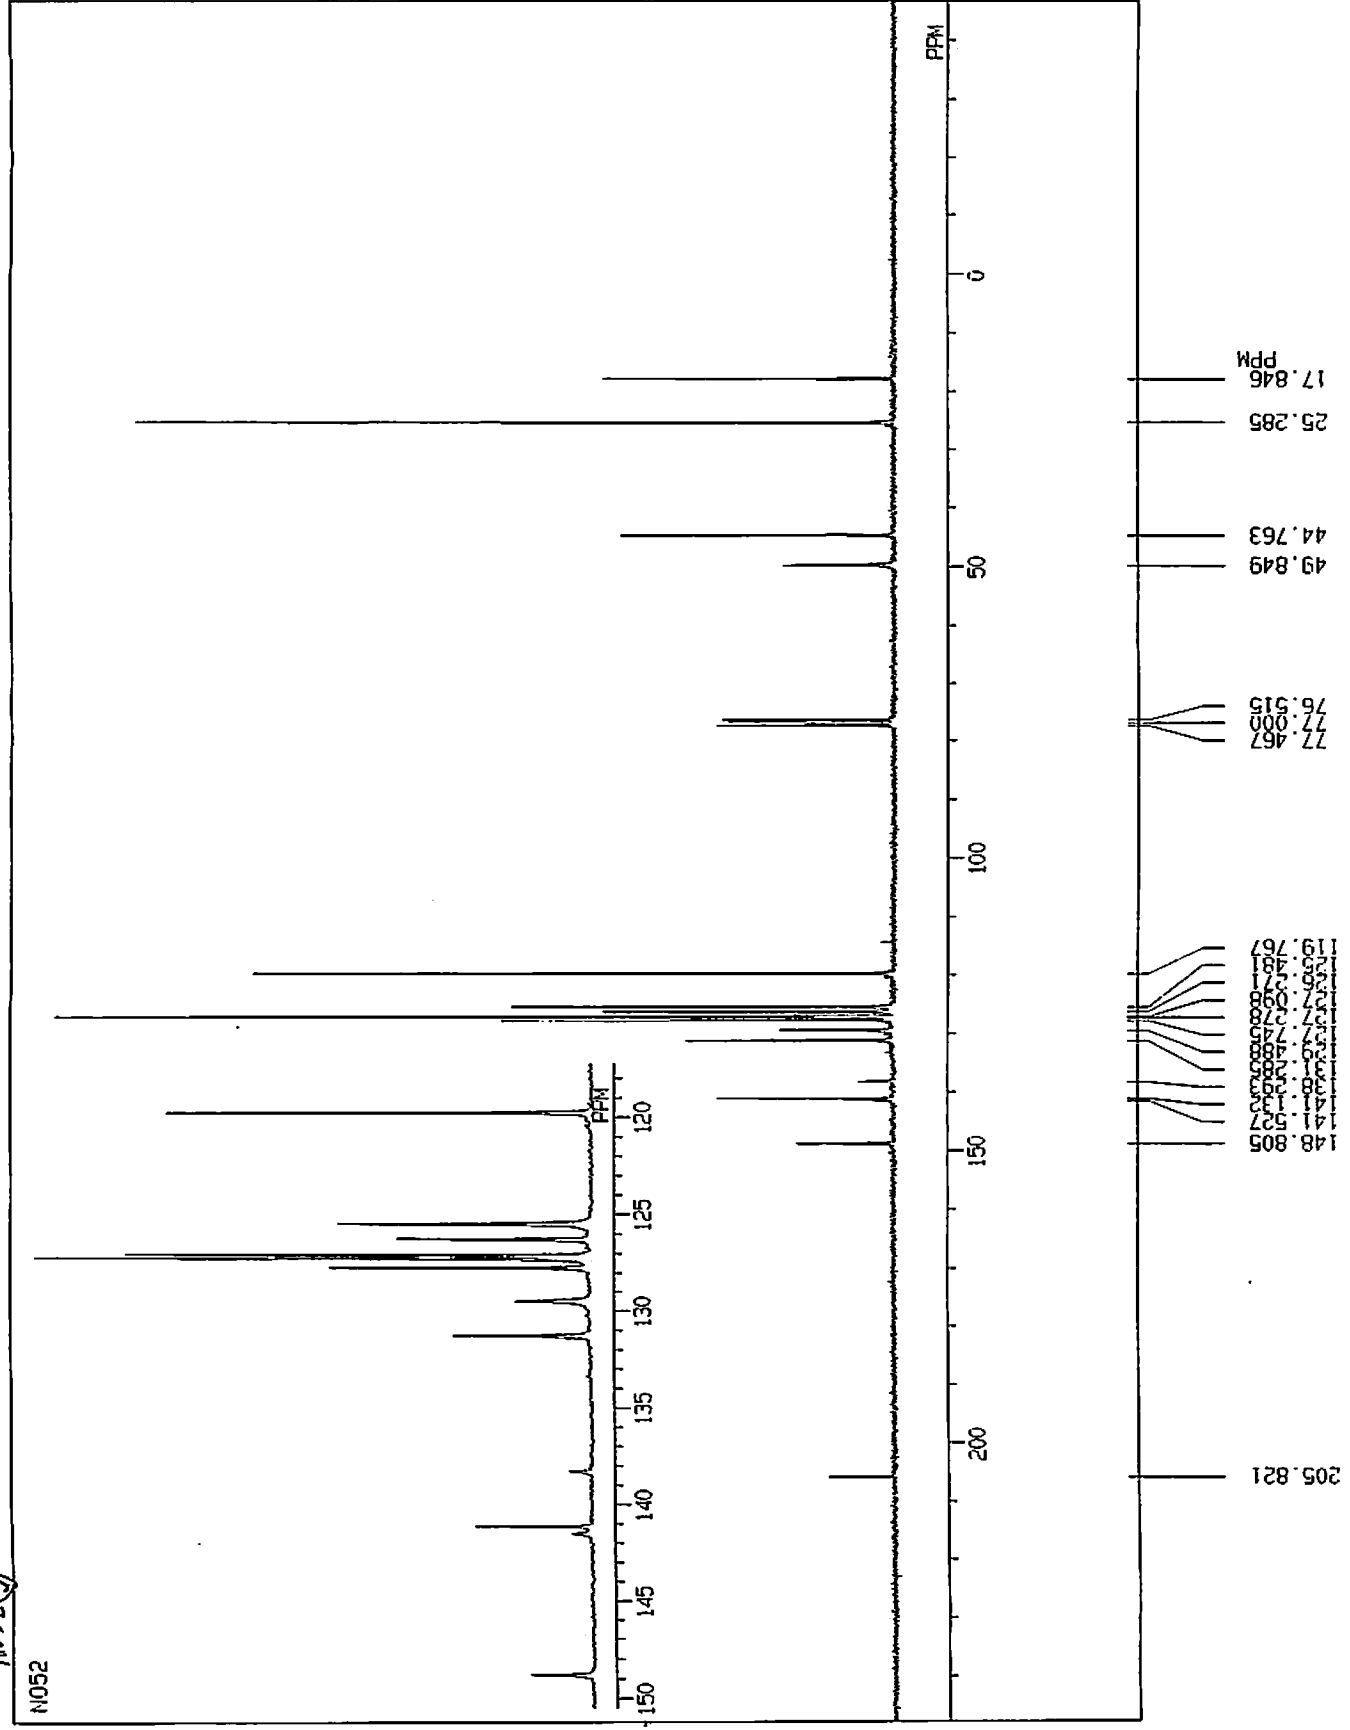

05-FEB-07 23:46:00

DFILE 01H  
OBNUC 1H  
EXMOD NON  
QFR 270.05 MHz  
OBSET 112.00 kHz  
OBFIN 5800.0 Hz  
POINT 32768  
FREQU 5405.4 Hz  
SCANS 16  
ACQTM 3.031 sec  
PD 3.969 sec  
PW1 5.0 us  
IRNUC 1H  
CTEMP 16.9 c  
SLVNT CDCL3  
EXREF 7.26 ppm  
BF 0.16 Hz  
RGAIN 18  
OPERATOR :

Supplementary Material (ESI) for Chemical Communications  
This journal is (c) The Royal Society of Chemistry 2008

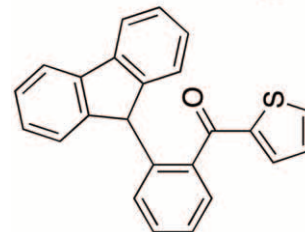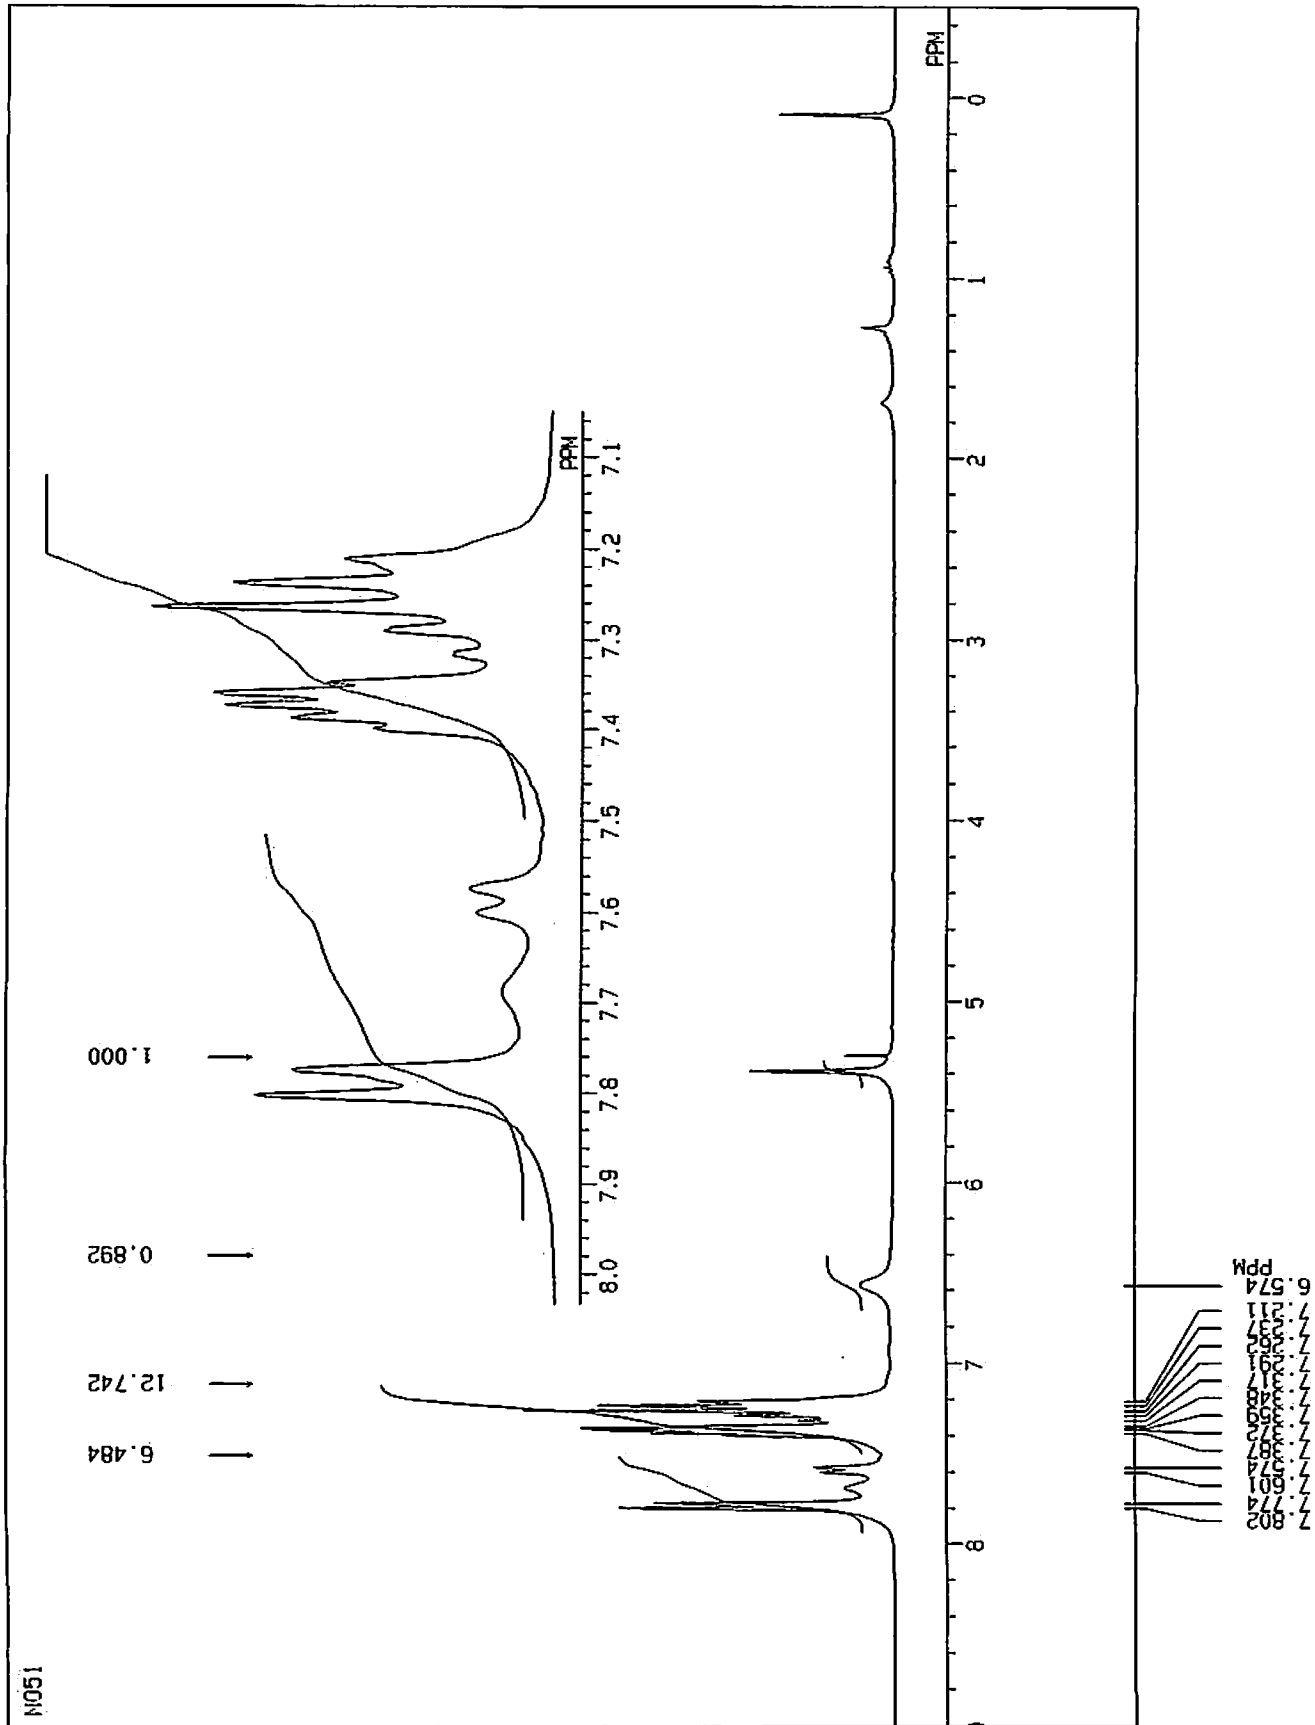

A6346

21-SEP-06 16: 44: 34

NO 4636

DFILE SAVING

OBNUC 13C

EXMOD BCM

OFR 67.80 MHz

OBSET 135.00 kHz

OBFIN 5200.0 Hz

POINT 32758

FREGU 20000.0 Hz

SCANS 172

ACGTM 0.81 sec

PD 2.18 sec

PW1 5.0 us

IRNUC 1H

CTEMP 21.4 C

SLVNT CDCL3

EXREF 77.00 ppm

BF 1.22 Hz

RGAIN 28

OPERATOR :

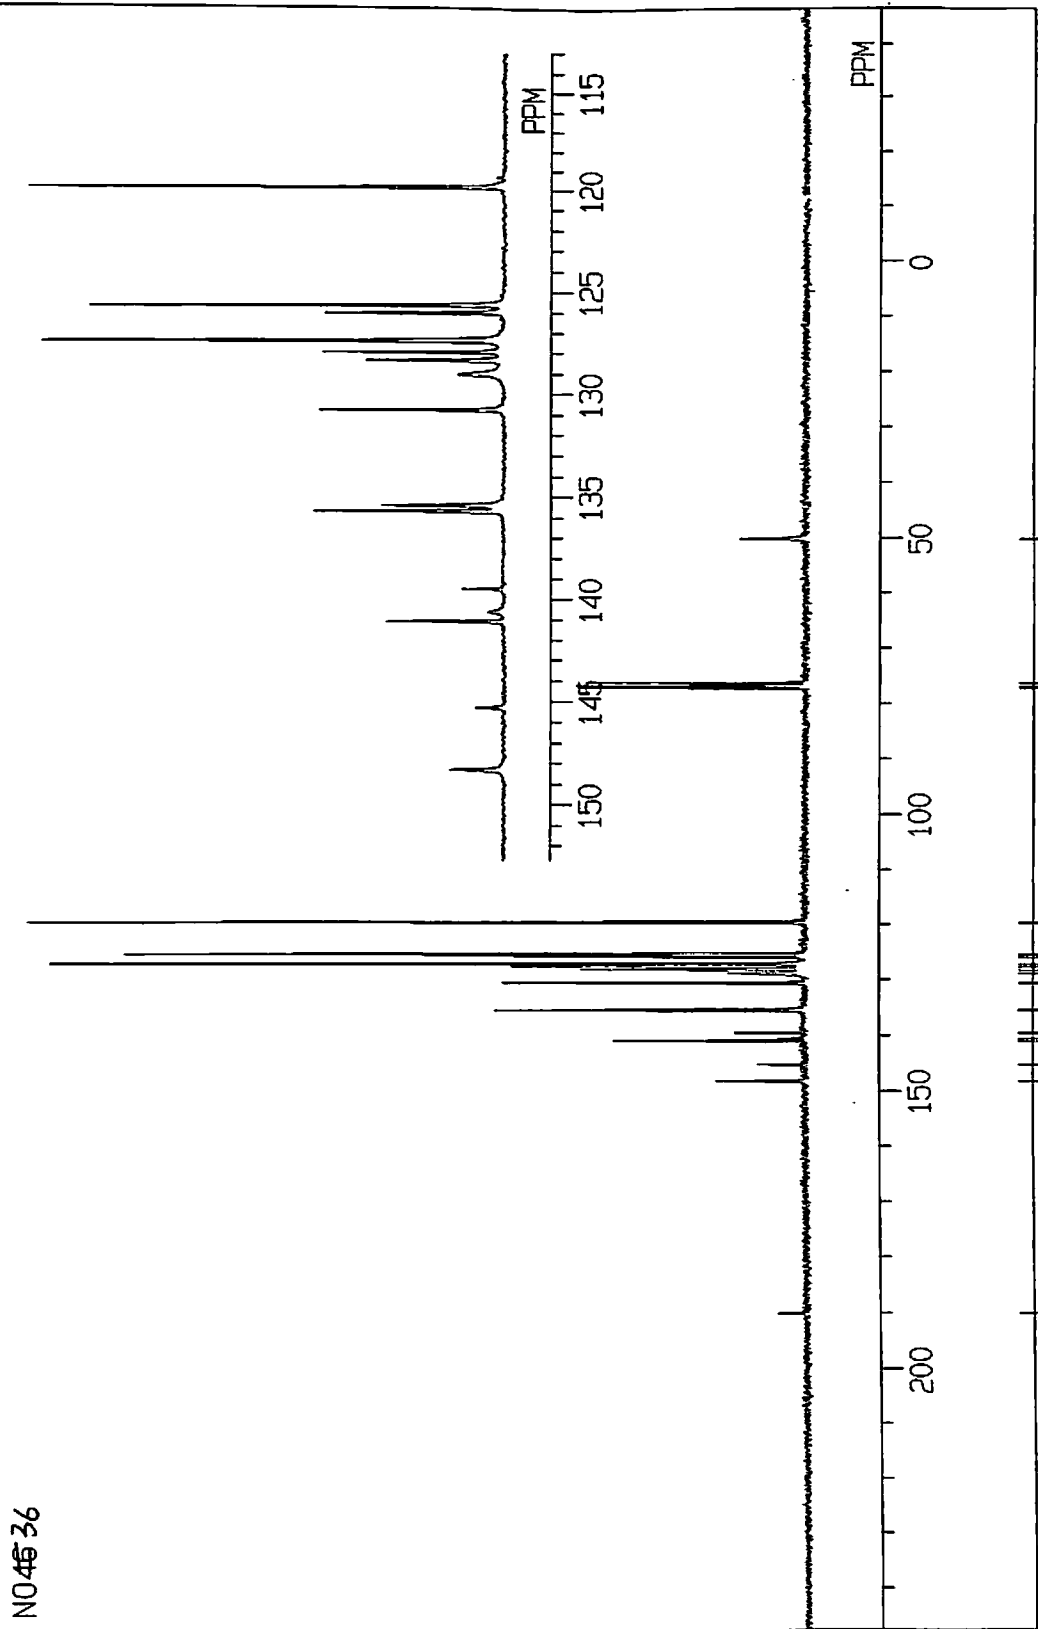

| Chemical Shift (ppm) | Integration |
|----------------------|-------------|
| 190.170              | 1.0000      |
| 144.500              | 1.0000      |
| 144.000              | 1.0000      |
| 143.500              | 1.0000      |
| 143.000              | 1.0000      |
| 142.500              | 1.0000      |
| 142.000              | 1.0000      |
| 141.500              | 1.0000      |
| 141.000              | 1.0000      |
| 140.500              | 1.0000      |
| 140.000              | 1.0000      |
| 139.500              | 1.0000      |
| 139.000              | 1.0000      |
| 138.500              | 1.0000      |
| 138.000              | 1.0000      |
| 137.500              | 1.0000      |
| 137.000              | 1.0000      |
| 136.500              | 1.0000      |
| 136.000              | 1.0000      |
| 135.500              | 1.0000      |
| 135.000              | 1.0000      |
| 134.500              | 1.0000      |
| 134.000              | 1.0000      |
| 133.500              | 1.0000      |
| 133.000              | 1.0000      |
| 132.500              | 1.0000      |
| 132.000              | 1.0000      |
| 131.500              | 1.0000      |
| 131.000              | 1.0000      |
| 130.500              | 1.0000      |
| 130.000              | 1.0000      |
| 129.500              | 1.0000      |
| 129.000              | 1.0000      |
| 128.500              | 1.0000      |
| 128.000              | 1.0000      |
| 127.500              | 1.0000      |
| 127.000              | 1.0000      |
| 126.500              | 1.0000      |
| 126.000              | 1.0000      |
| 125.500              | 1.0000      |
| 125.000              | 1.0000      |
| 124.500              | 1.0000      |
| 124.000              | 1.0000      |
| 123.500              | 1.0000      |
| 123.000              | 1.0000      |
| 122.500              | 1.0000      |
| 122.000              | 1.0000      |
| 121.500              | 1.0000      |
| 121.000              | 1.0000      |
| 120.500              | 1.0000      |
| 120.000              | 1.0000      |
| 119.500              | 1.0000      |
| 119.000              | 1.0000      |
| 118.500              | 1.0000      |
| 118.000              | 1.0000      |
| 117.500              | 1.0000      |
| 117.000              | 1.0000      |
| 116.500              | 1.0000      |
| 116.000              | 1.0000      |
| 115.500              | 1.0000      |
| 115.000              | 1.0000      |
| 114.500              | 1.0000      |
| 114.000              | 1.0000      |
| 113.500              | 1.0000      |
| 113.000              | 1.0000      |
| 112.500              | 1.0000      |
| 112.000              | 1.0000      |
| 111.500              | 1.0000      |
| 111.000              | 1.0000      |
| 110.500              | 1.0000      |
| 110.000              | 1.0000      |
| 109.500              | 1.0000      |
| 109.000              | 1.0000      |
| 108.500              | 1.0000      |
| 108.000              | 1.0000      |
| 107.500              | 1.0000      |
| 107.000              | 1.0000      |
| 106.500              | 1.0000      |
| 106.000              | 1.0000      |
| 105.500              | 1.0000      |
| 105.000              | 1.0000      |
| 104.500              | 1.0000      |
| 104.000              | 1.0000      |
| 103.500              | 1.0000      |
| 103.000              | 1.0000      |
| 102.500              | 1.0000      |
| 102.000              | 1.0000      |
| 101.500              | 1.0000      |
| 101.000              | 1.0000      |
| 100.500              | 1.0000      |
| 100.000              | 1.0000      |
| 99.500               | 1.0000      |
| 99.000               | 1.0000      |
| 98.500               | 1.0000      |
| 98.000               | 1.0000      |
| 97.500               | 1.0000      |
| 97.000               | 1.0000      |
| 96.500               | 1.0000      |
| 96.000               | 1.0000      |
| 95.500               | 1.0000      |
| 95.000               | 1.0000      |
| 94.500               | 1.0000      |
| 94.000               | 1.0000      |
| 93.500               | 1.0000      |
| 93.000               | 1.0000      |
| 92.500               | 1.0000      |
| 92.000               | 1.0000      |
| 91.500               | 1.0000      |
| 91.000               | 1.0000      |
| 90.500               | 1.0000      |
| 90.000               | 1.0000      |
| 89.500               | 1.0000      |
| 89.000               | 1.0000      |
| 88.500               | 1.0000      |
| 88.000               | 1.0000      |
| 87.500               | 1.0000      |
| 87.000               | 1.0000      |
| 86.500               | 1.0000      |
| 86.000               | 1.0000      |
| 85.500               | 1.0000      |
| 85.000               | 1.0000      |
| 84.500               | 1.0000      |
| 84.000               | 1.0000      |
| 83.500               | 1.0000      |
| 83.000               | 1.0000      |
| 82.500               | 1.0000      |
| 82.000               | 1.0000      |
| 81.500               | 1.0000      |
| 81.000               | 1.0000      |
| 80.500               | 1.0000      |
| 80.000               | 1.0000      |
| 79.500               | 1.0000      |
| 79.000               | 1.0000      |
| 78.500               | 1.0000      |
| 78.000               | 1.0000      |
| 77.500               | 1.0000      |
| 77.000               | 1.0000      |
| 76.500               | 1.0000      |
| 76.000               | 1.0000      |
| 75.500               | 1.0000      |
| 75.000               | 1.0000      |
| 74.500               | 1.0000      |
| 74.000               | 1.0000      |
| 73.500               | 1.0000      |
| 73.000               | 1.0000      |
| 72.500               | 1.0000      |
| 72.000               | 1.0000      |
| 71.500               | 1.0000      |
| 71.000               | 1.0000      |
| 70.500               | 1.0000      |
| 70.000               | 1.0000      |
| 69.500               | 1.0000      |
| 69.000               | 1.0000      |
| 68.500               | 1.0000      |
| 68.000               | 1.0000      |
| 67.500               | 1.0000      |
| 67.000               | 1.0000      |
| 66.500               | 1.0000      |
| 66.000               | 1.0000      |
| 65.500               | 1.0000      |
| 65.000               | 1.0000      |
| 64.500               | 1.0000      |
| 64.000               | 1.0000      |
| 63.500               | 1.0000      |
| 63.000               | 1.0000      |
| 62.500               | 1.0000      |
| 62.000               | 1.0000      |
| 61.500               | 1.0000      |
| 61.000               | 1.0000      |
| 60.500               | 1.0000      |
| 60.000               | 1.0000      |
| 59.500               | 1.0000      |
| 59.000               | 1.0000      |
| 58.500               | 1.0000      |
| 58.000               | 1.0000      |
| 57.500               | 1.0000      |
| 57.000               | 1.0000      |
| 56.500               | 1.0000      |
| 56.000               | 1.0000      |
| 55.500               | 1.0000      |
| 55.000               | 1.0000      |
| 54.500               | 1.0000      |
| 54.000               | 1.0000      |
| 53.500               | 1.0000      |
| 53.000               | 1.0000      |
| 52.500               | 1.0000      |
| 52.000               | 1.0000      |
| 51.500               | 1.0000      |
| 51.000               | 1.0000      |
| 50.500               | 1.0000      |
| 50.000               | 1.0000      |
| 49.500               | 1.0000      |
| 49.000               | 1.0000      |
| 48.500               | 1.0000      |
| 48.000               | 1.0000      |
| 47.500               | 1.0000      |
| 47.000               | 1.0000      |
| 46.500               | 1.0000      |
| 46.000               | 1.0000      |
| 45.500               | 1.0000      |
| 45.000               | 1.0000      |
| 44.500               | 1.0000      |
| 44.000               | 1.0000      |
| 43.500               | 1.0000      |
| 43.000               | 1.0000      |
| 42.500               | 1.0000      |
| 42.000               | 1.0000      |
| 41.500               | 1.0000      |
| 41.000               | 1.0000      |
| 40.500               | 1.0000      |
| 40.000               | 1.0000      |
| 39.500               | 1.0000      |
| 39.000               | 1.0000      |
| 38.500               | 1.0000      |
| 38.000               | 1.0000      |
| 37.500               | 1.0000      |
| 37.000               | 1.0000      |
| 36.500               | 1.0000      |
| 36.000               | 1.0000      |
| 35.500               | 1.0000      |
| 35.000               | 1.0000      |
| 34.500               | 1.0000      |
| 34.000               | 1.0000      |
| 33.500               | 1.0000      |
| 33.000               | 1.0000      |
| 32.500               | 1.0000      |
| 32.000               | 1.0000      |
| 31.500               | 1.0000      |
| 31.000               | 1.0000      |
| 30.500               | 1.0000      |
| 30.000               | 1.0000      |
| 29.500               | 1.0000      |
| 29.000               | 1.0000      |
| 28.500               | 1.0000      |
| 28.000               | 1.0000      |
| 27.500               | 1.0000      |
| 27.000               | 1.0000      |
| 26.500               | 1.0000      |
| 26.000               | 1.0000      |
| 25.500               | 1.0000      |
| 25.000               | 1.0000      |
| 24.500               | 1.0000      |
| 24.000               | 1.0000      |
| 23.500               | 1.0000      |
| 23.000               | 1.0000      |
| 22.500               | 1.0000      |
| 22.000               | 1.0000      |
| 21.500               | 1.0000      |
| 21.000               | 1.0000      |
| 20.500               | 1.0000      |
| 20.000               | 1.0000      |
| 19.500               | 1.0000      |
| 19.000               | 1.0000      |
| 18.500               | 1.0000      |
| 18.000               | 1.0000      |
| 17.500               | 1.0000      |
| 17.000               | 1.0000      |
| 16.500               | 1.0000      |
| 16.000               | 1.0000      |
| 15.500               | 1.0000      |
| 15.000               | 1.0000      |
| 14.500               | 1.0000      |
| 14.000               | 1.0000      |
| 13.500               | 1.0000      |
| 13.000               | 1.0000      |
| 12.500               | 1.0000      |
| 12.000               | 1.0000      |
| 11.500               | 1.0000      |
| 11.000               | 1.0000      |
| 10.500               | 1.0000      |
| 10.000               | 1.0000      |
| 9.500                | 1.0000      |
| 9.000                | 1.0000      |
| 8.500                | 1.0000      |
| 8.000                | 1.0000      |
| 7.500                | 1.0000      |
| 7.000                | 1.0000      |
| 6.500                | 1.0000      |
| 6.000                | 1.0000      |
| 5.500                | 1.0000      |
| 5.000                | 1.0000      |
| 4.500                | 1.0000      |
| 4.000                | 1.0000      |
| 3.500                | 1.0000      |
| 3.000                | 1.0000      |
| 2.500                | 1.0000      |
| 2.000                | 1.0000      |
| 1.500                | 1.0000      |
| 1.000                | 1.0000      |
| 0.500                | 1.0000      |
| 0.000                | 1.0000      |

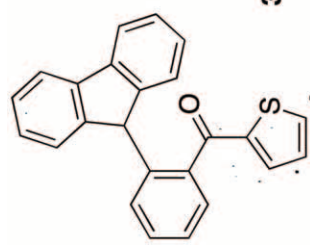

\_DEFAULT.ALS

Sat Jun 30 16:58:17 2007

Supplementary Material (ESI) for Chemical Communications  
This journal is (c) The Royal Society of Chemistry 2008

DFILE  
COMINT  
DATIM  
OBNUC  
EXMOD  
OBFRQ  
OBSET  
OBFIN  
POINT  
FREQU  
SCANS  
ACQTM  
PD  
PW1  
IRNUC  
CTEMP  
SLVNT  
EXREF  
BF  
RGAIN

270.05 MHz  
112.00 KHz  
5800.00 Hz  
16384  
5401.76 Hz  
16  
3.0331 sec  
3.9670 sec  
5.40 usec  
1H  
17.1 c  
CDCL3  
7.26 ppm  
0.12 Hz  
16

1-29-4

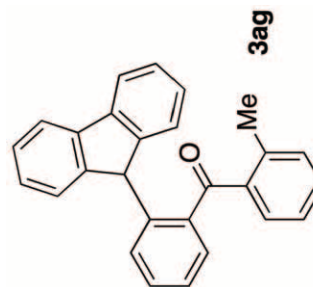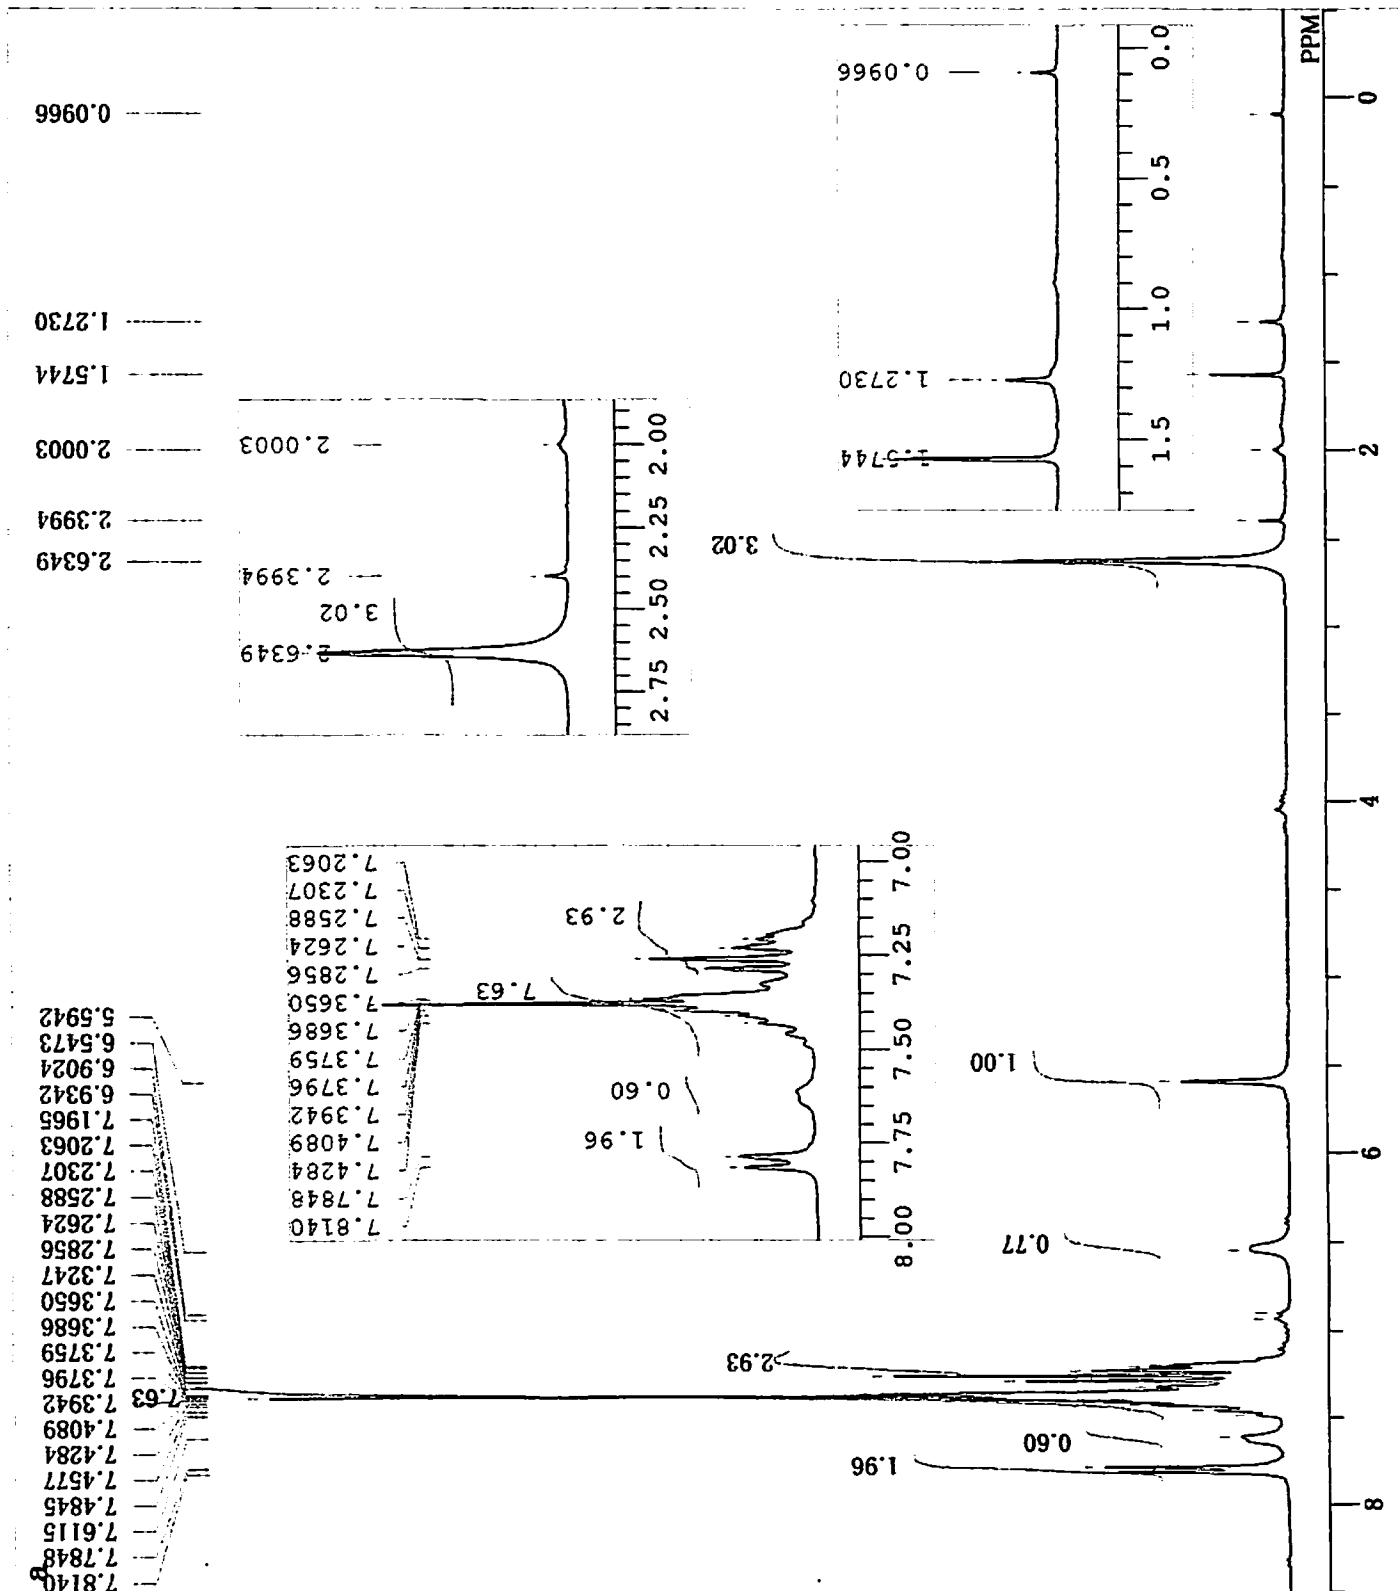



\_DEFAULT.ALS

Tue Jul 10 18:27:48 2007

Supplementary Material (ESI) for Chemical Communications  
This journal is (c) The Royal Society of Chemistry 2008

1-24-9

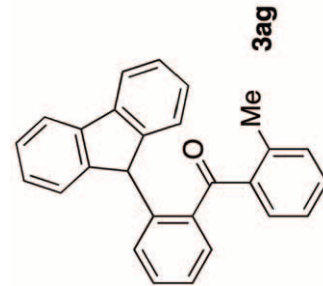

DFILE  
COMNT  
DATIM  
OBNUC  
EXMOD  
OBFRQ  
OBSET  
OBFIN  
POINT  
FREQU  
SCANS  
ACQTM  
PD  
PW1  
IRNUC  
CTEMP  
SLVNT  
EXREF  
BF  
RGAIN

67.80 MHz  
135.00 KHz  
5200.00 Hz  
32768  
18306.64 Hz  
4034  
1.7900 sec  
1.2100 sec  
3.50 usec  
1H 19.4 c  
CDCl3  
77.00 ppm  
0.12 Hz  
28

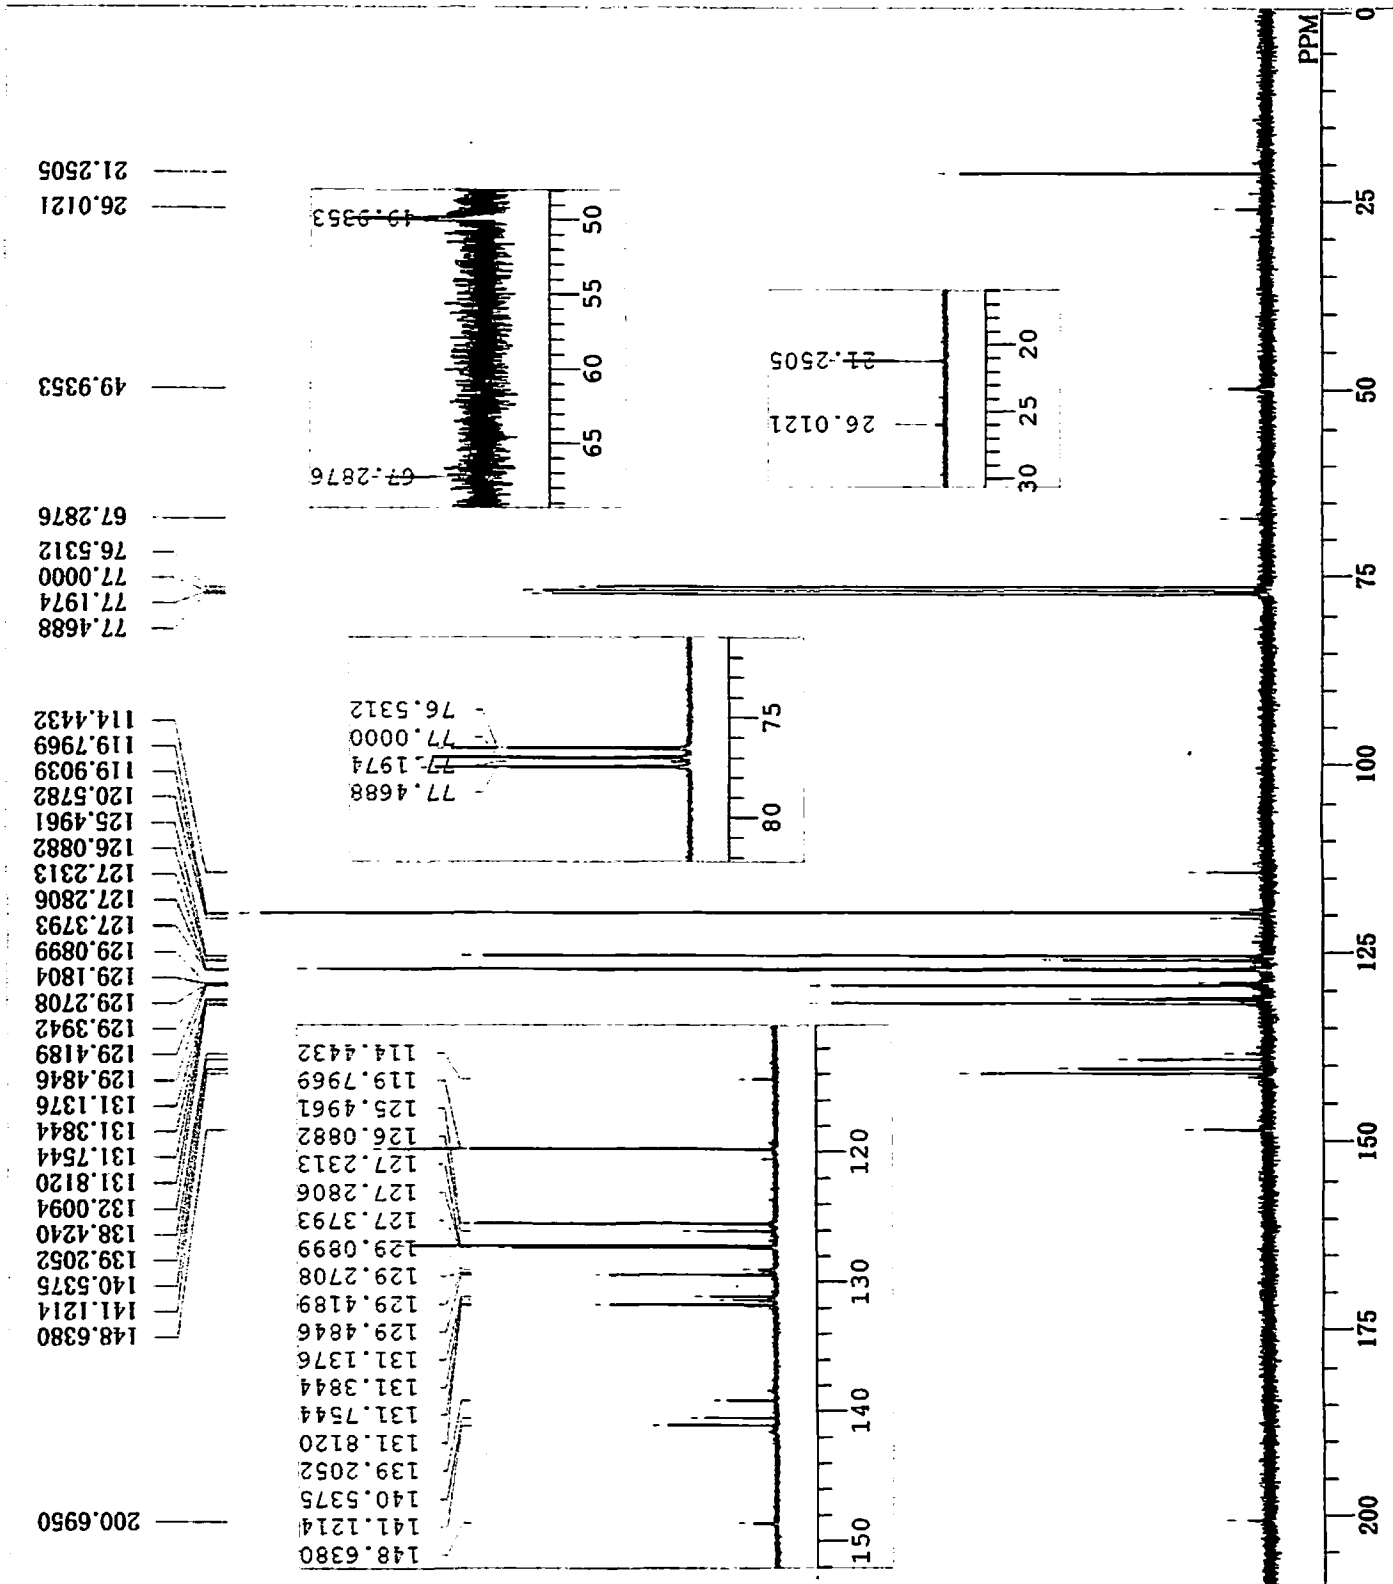

20-JUN-06 17: 43: 49

DFILE SAVING

OBNUC 1H

EXMOD NON

OFPR 270.00 MHz

OBSET 112.00 KHZ

OBFIN 5800.0 HZ

POINT 32768

FREQU 5405.4 HZ

SCANS 16

ACQTM 3.03 Sec

PD 3.96 Sec

PW1 5.0 US

IRNUC 1H

CTEMP 19.0 C

SLVNT CDCL3

EXREF 7.26 ppm

BF 0.16 HZ

RGAIN 25

OPERATOR :

N021.2006/06/20

0.944  
1.000  
1.000

11.3885  
5.8885  
5.3885

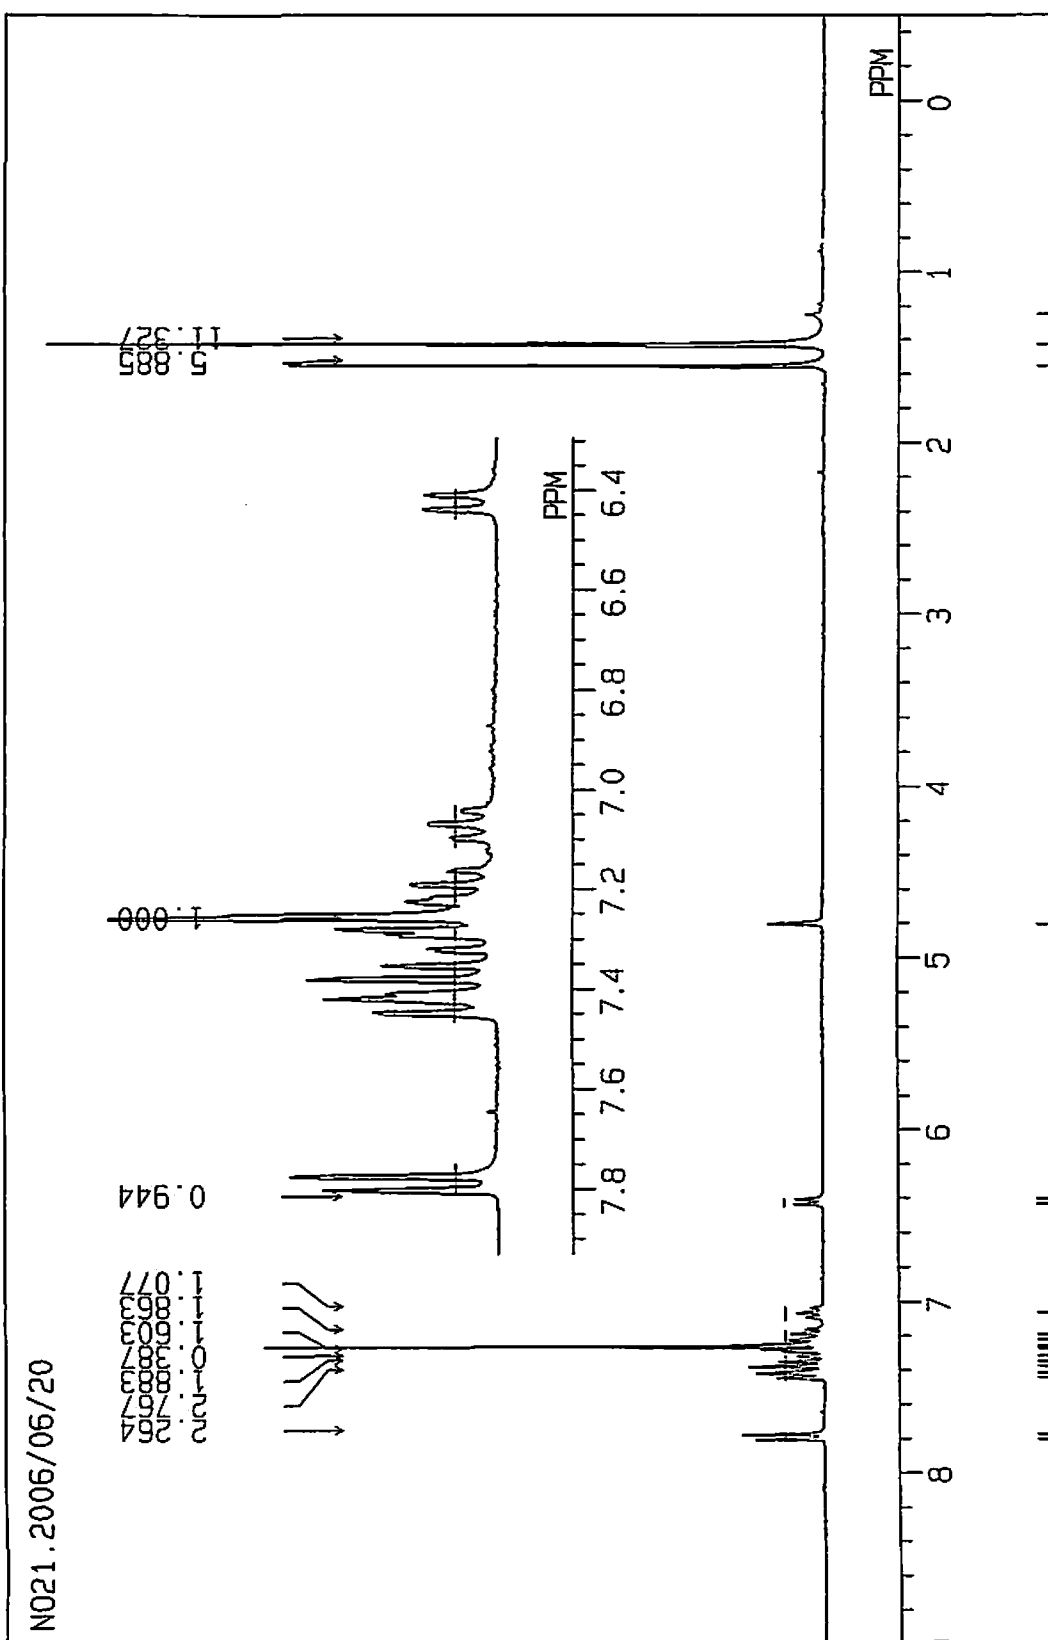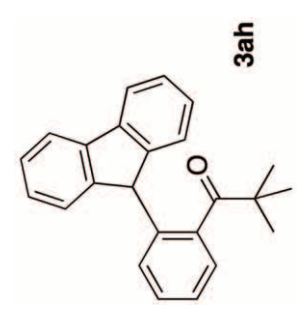

1.111  
1.4005  
1.3005  
1.2005

4.805

0.60  
0.40  
0.20  
0.10  
0.05  
0.02  
0.01

03-FEB-07 18:34:10

Supplementary Material (ESI) for Chemical Communications  
This journal is © The Royal Society of Chemistry 2008

DFILE Q1H  
OBNUC 13C  
EXMOD BCM

OFR 67.80 MHz  
OBSET 135.00 MHz  
OBFIN 5200.0 Hz  
POINT 32768  
FREQU 20000.0 Hz  
SCANS 2343  
ACQTM 0.819 sec  
PD 2.181 sec  
PW1 5.000 us  
IRNUC 1H  
CTEMP 20.6 C  
SLVNT CDCL3  
EXREF 77.00 ppm  
BF 1.22 Hz  
RGAIN 28  
OPERATOR :

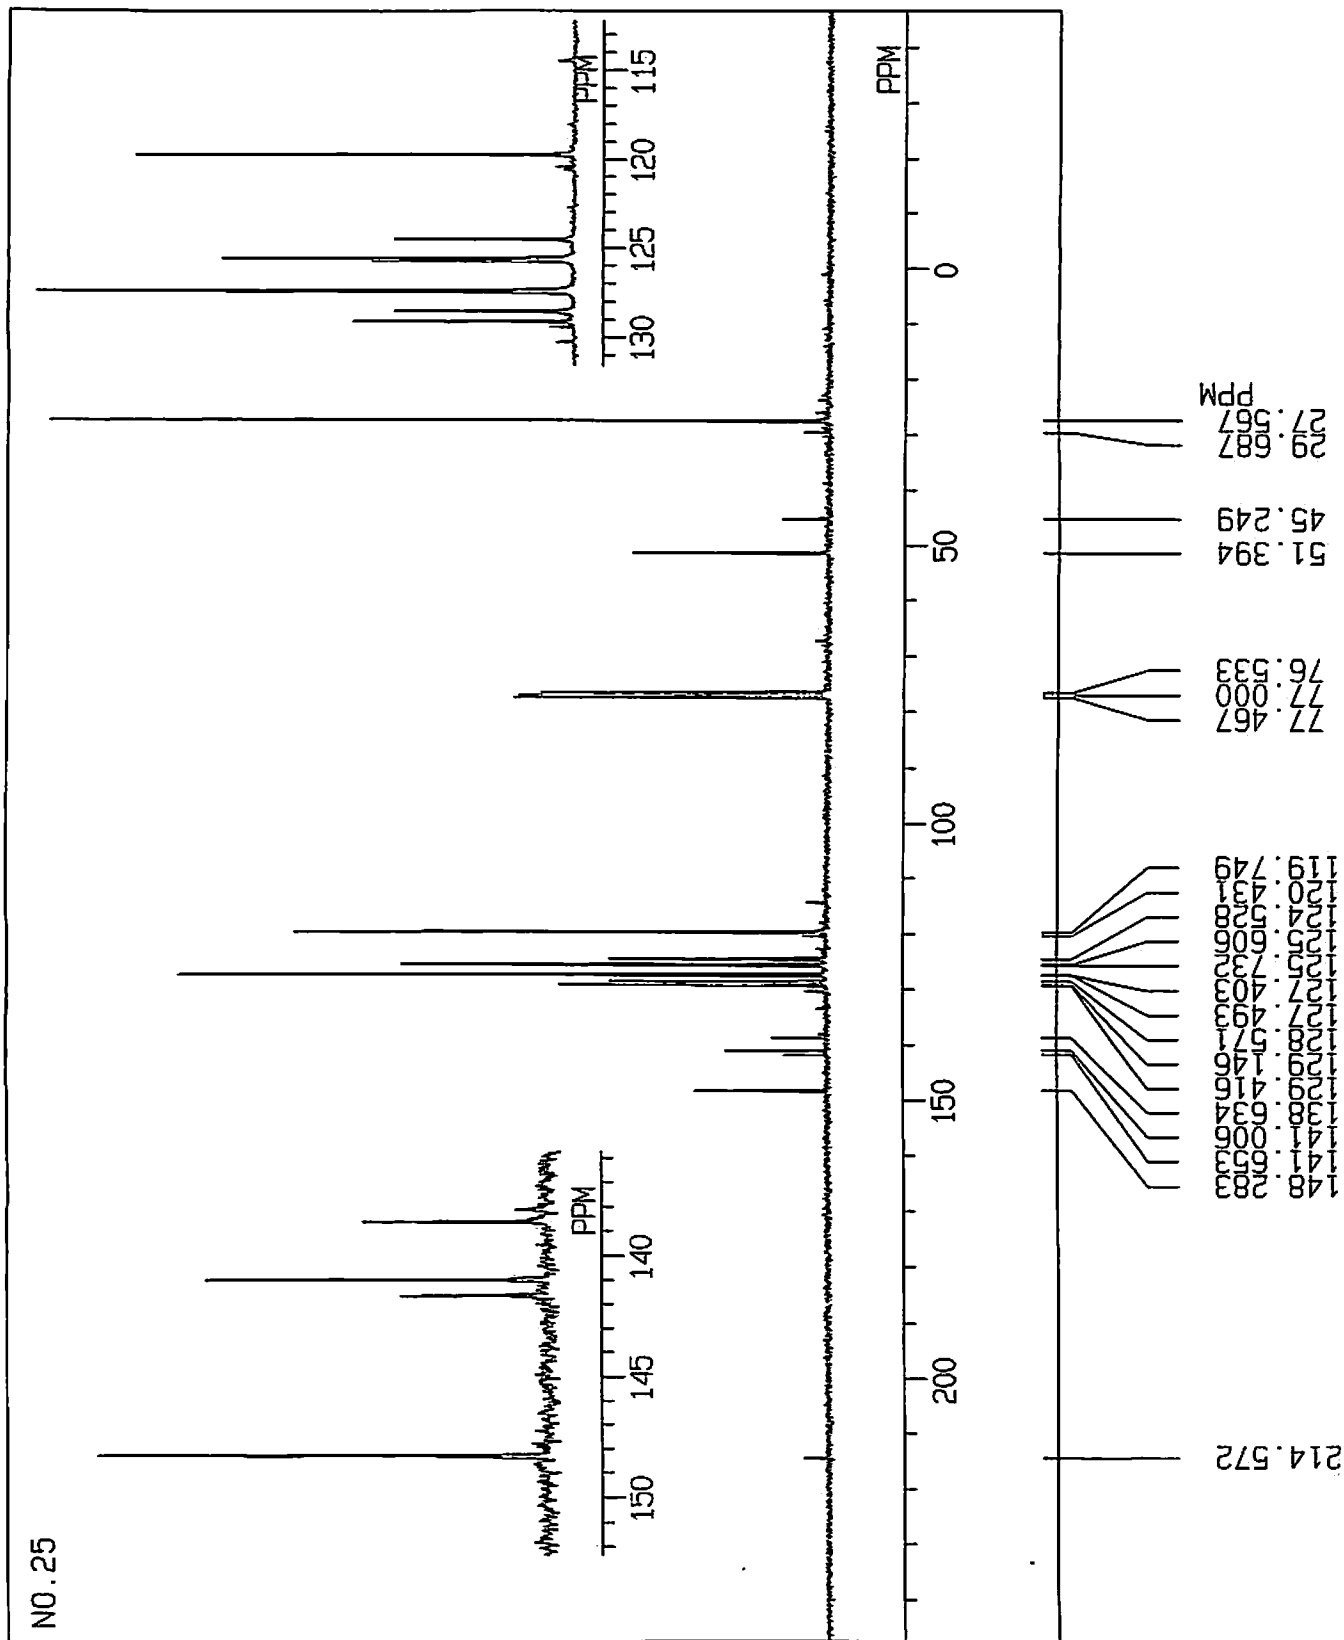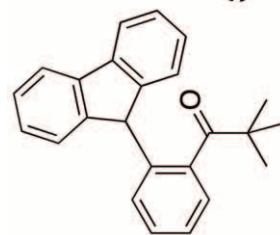

20-APR-06 10:21:10

DFILE SAVING

OBNUC 1H

EXMOD NON

OFFR 270.00 MHz

OBSET 112.00 KHz

OBFIN 5800.0 Hz

POINT 32760

FREQU 5405.4 Hz

SCANS 16

ACQTM 3.03 sec

PD 3.96 sec

PW1 5.0 us

IRNUC 1H

CTEMP 19.9 C

SLVNT CDCL3

EXREF 7.25 ppm

BF 0.16 Hz

RGAIN 26

OPERATOR :

Supplementary Material (ESI) for Chemical Communications  
This journal is © The Royal Society of Chemistry 2008

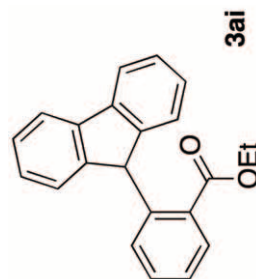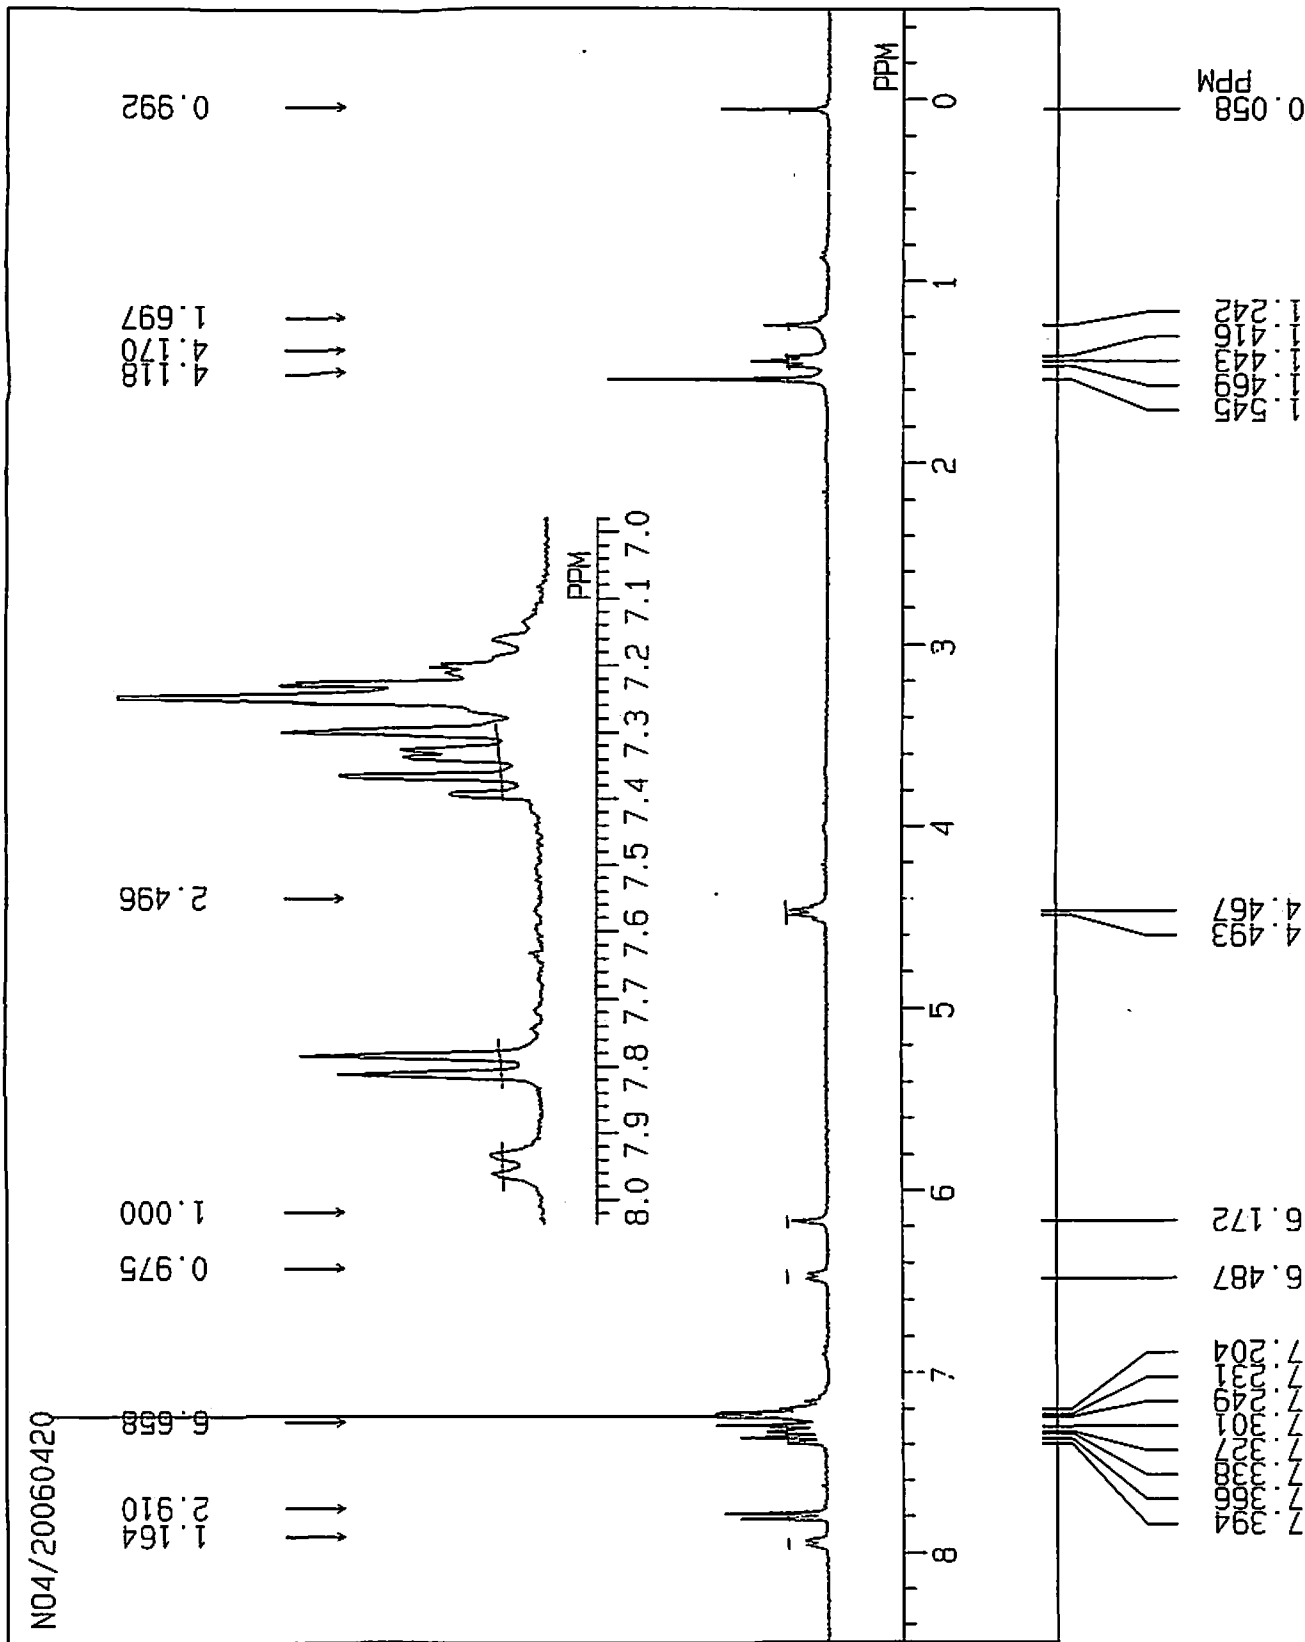

13-APR-20 10:54:39

DFILE SAVING

OBNUC 13C

EXMOD BCM

QFR 67.80 MHz

OBSET 135.00 MHz

OBFIN 5200.0 Hz

POINT 32768

FREQU 20000.0 Hz

SCANS 704

ACQTM 0.819 sec

PD 2.18 sec

PW1 5.0 us

IRNUC 1H

CTEMP 20.4 C

SLVNT CDCL3

EXREF 77.00 ppm

BF 1.22 Hz

RGAIN 28

OPERATOR :

N06.20060427

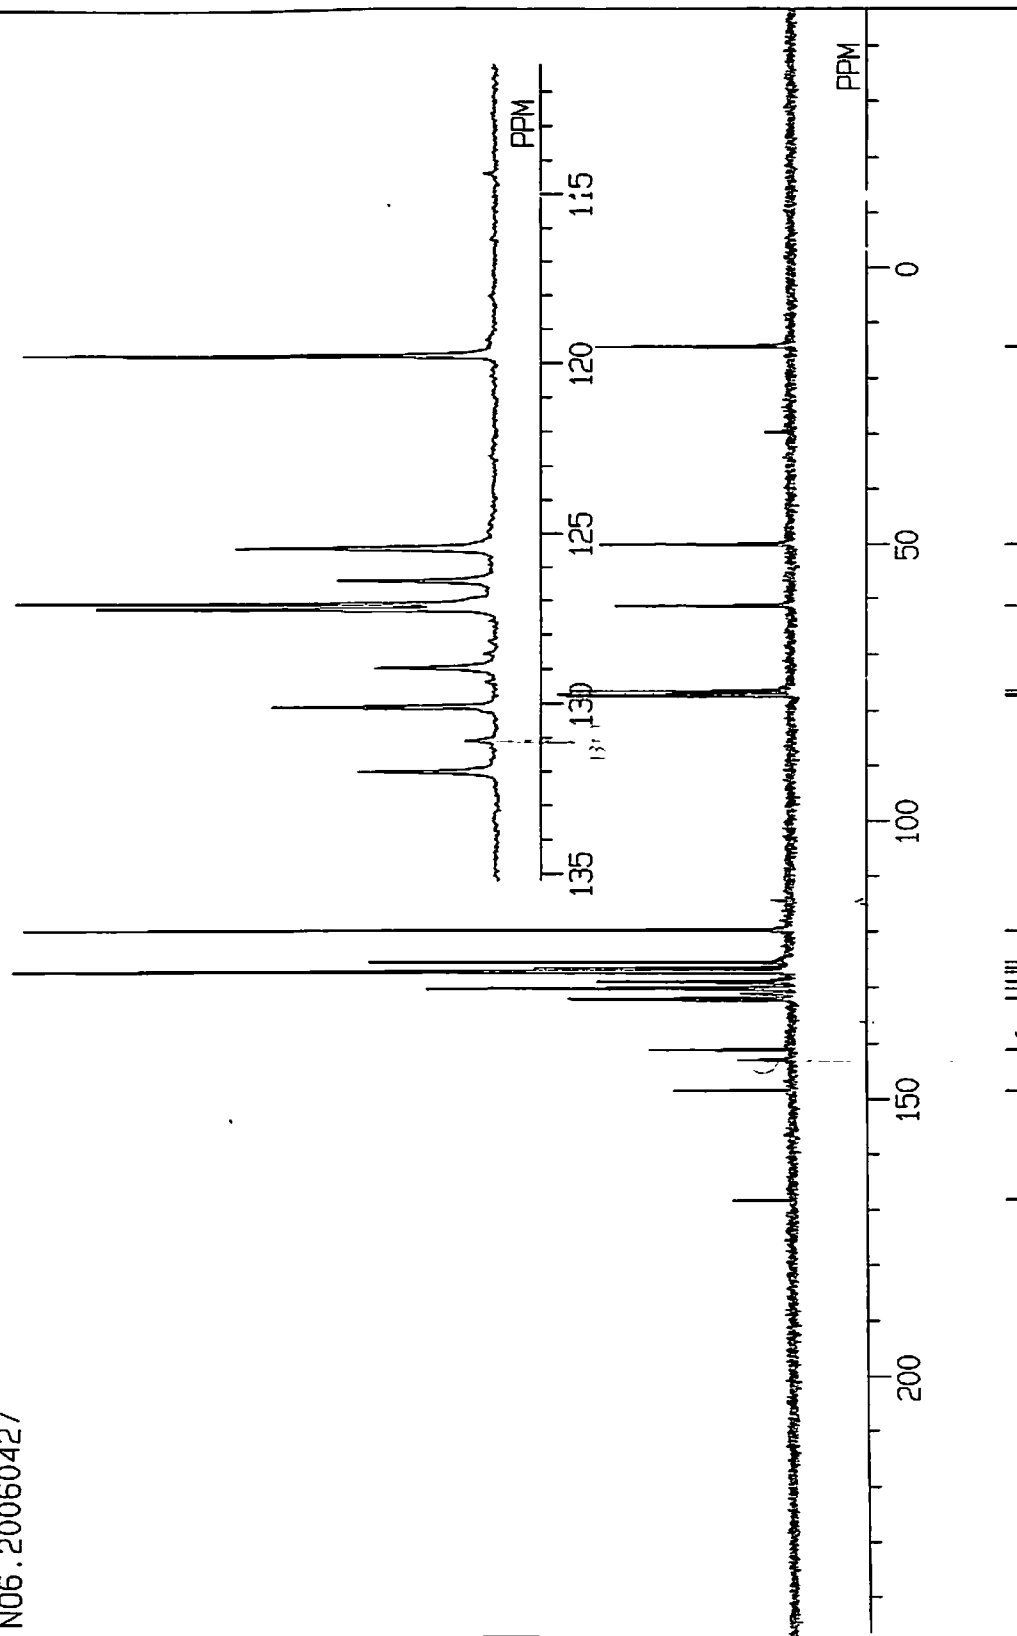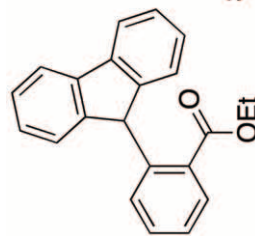

168.265  
148.448  
147.114  
145.445  
141.114  
139.003  
138.802  
137.274  
135.250  
134.116  
132.257  
131.116  
129.410  
127.410  
125.410  
124.116  
122.257  
120.410  
118.410  
116.410  
114.410  
112.410  
110.410  
108.410  
106.410  
104.410  
102.410  
100.410  
98.410  
96.410  
94.410  
92.410  
90.410  
88.410  
86.410  
84.410  
82.410  
80.410  
78.410  
76.410  
74.410  
72.410  
70.410  
68.410  
66.410  
64.410  
62.410  
60.410  
58.410  
56.410  
54.410  
52.410  
50.410  
48.410  
46.410  
44.410  
42.410  
40.410  
38.410  
36.410  
34.410  
32.410  
30.410  
28.410  
26.410  
24.410  
22.410  
20.410  
18.410  
16.410  
14.410  
12.410  
10.410  
8.410  
6.410  
4.410  
2.410  
0.410

02-FEB-07 14:05:36

DFILE 01H  
 QBNUC 1H  
 EXMOD 110H  
 QFR 270.05 MHz  
 QBSET 112.00 kHz  
 QBFIN 5800.0 Hz  
 POINT 32768  
 FREOU 5405.4 Hz  
 SCANS 16  
 ACOTM 3.031 sec  
 PD 3.959 sec  
 PW1 5.0 us  
 IRNUC 1H  
 CTEMP 18.0 C  
 SLVNT CDCL3  
 EXREF 7.26 ppm  
 BF 0.16 Hz  
 RGAIN 14  
 OPERATOR :

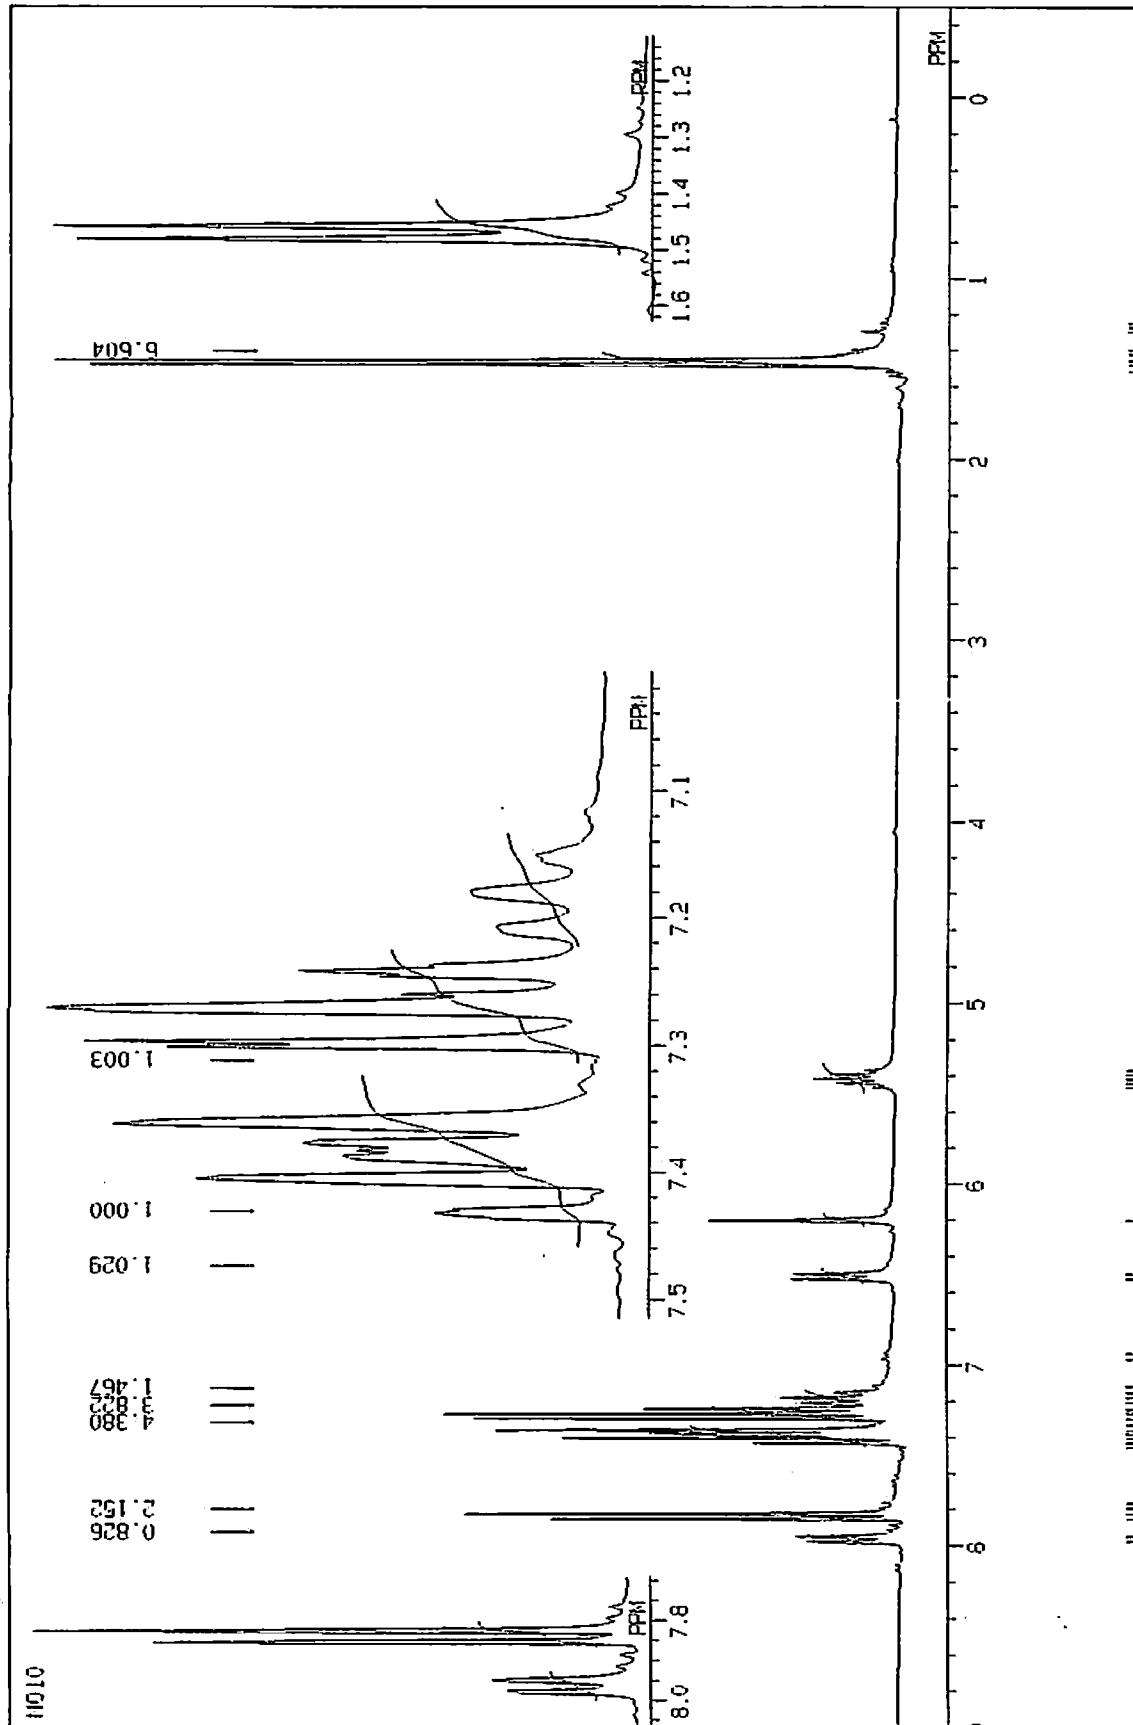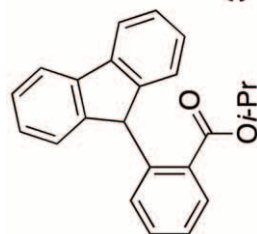

3aj

PPM  
 0.604  
 1.6  
 1.2

PPM  
 7.8  
 7.5  
 7.4  
 7.3  
 7.2  
 7.1  
 6.8  
 6.6  
 6.5  
 6.4  
 6.3  
 6.2  
 6.1  
 6.0  
 5.9  
 5.8  
 5.7  
 5.6  
 5.5  
 5.4  
 5.3  
 5.2  
 5.1  
 5.0  
 4.9  
 4.8  
 4.7  
 4.6  
 4.5  
 4.4  
 4.3  
 4.2  
 4.1  
 4.0  
 3.9  
 3.8  
 3.7  
 3.6  
 3.5  
 3.4  
 3.3  
 3.2  
 3.1  
 3.0  
 2.9  
 2.8  
 2.7  
 2.6  
 2.5  
 2.4  
 2.3  
 2.2  
 2.1  
 2.0  
 1.9  
 1.8  
 1.7  
 1.6  
 1.5  
 1.4  
 1.3  
 1.2  
 1.1  
 1.0  
 0.9  
 0.8  
 0.7  
 0.6  
 0.5  
 0.4  
 0.3  
 0.2  
 0.1  
 0.0

27-MAY-06 09:28:07

DFILE SAVING  
 OBNUC 13C  
 EXMOD BCM  
 OFR 67.80 MHz  
 OBSET 135.00 kHz  
 OBFIN 5200.0 Hz  
 POINT 32758  
 FREQU 20000.0 Hz  
 SCANS 13366  
 ACGTM 0.819 sec  
 PD 2.181 sec  
 PW1 5.0 us  
 IRNUC 1H  
 CTEMP 20.6 C  
 SLVNT CDCL3  
 EXREF 77.00 ppm  
 BF 1.22 Hz  
 RGAIN 28  
 OPERATOR :

Supplementary Material (ESI) for Chemical Communications  
 This journal is (c) The Royal Society of Chemistry 2008

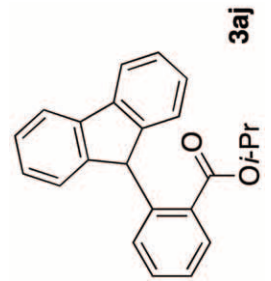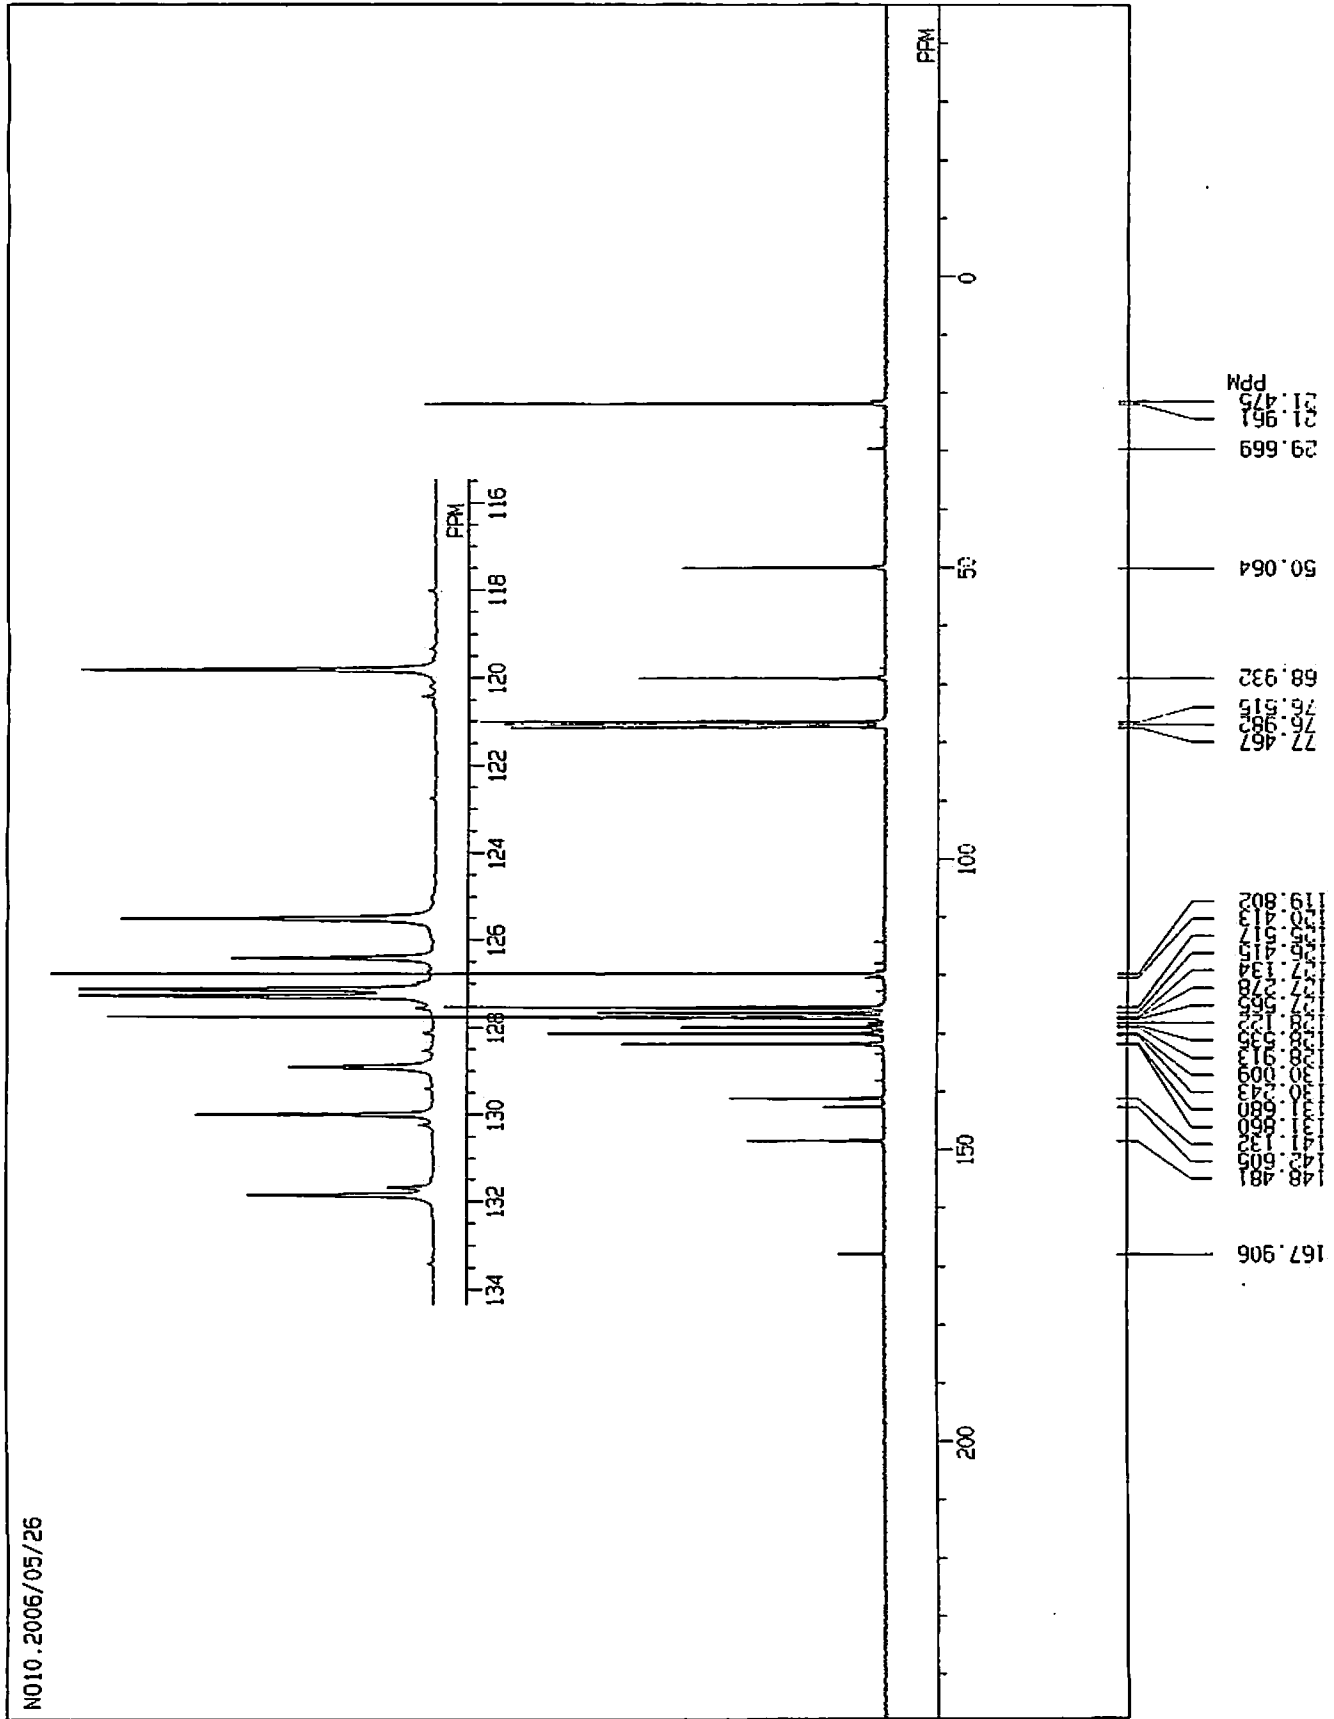





\_DEFAULT.ALS

Mon Feb 11 02:21:15 2008

Supplementary Material (ESI) for Chemical Communications  
This journal is (c) The Royal Society of Chemistry 2008

DRILE  
COMINT  
DATIM  
OBNUC  
EXMOD  
OBFRQ  
OBSET  
OBFIN  
POINT  
FREQU  
SCANS  
ACQTM  
PD  
PWI  
IRNUC  
CTEMP  
SLVNT  
EXREF  
BF  
RGAIN

67.80 MHz  
135.00 KHz  
5200.00 Hz  
32768  
18306.64 Hz  
3987  
1.7900 sec  
1.2100 sec  
3.50 uscc  
1H  
10.1 c  
CDCl<sub>3</sub>  
77.00 ppm  
0.12 Hz  
27

1-46-9

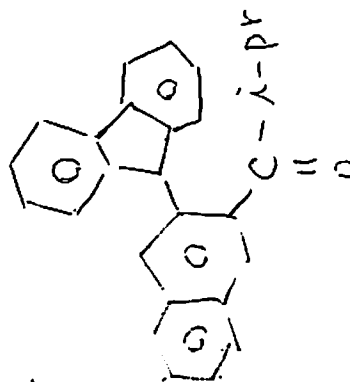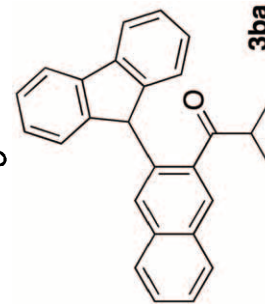

3ba

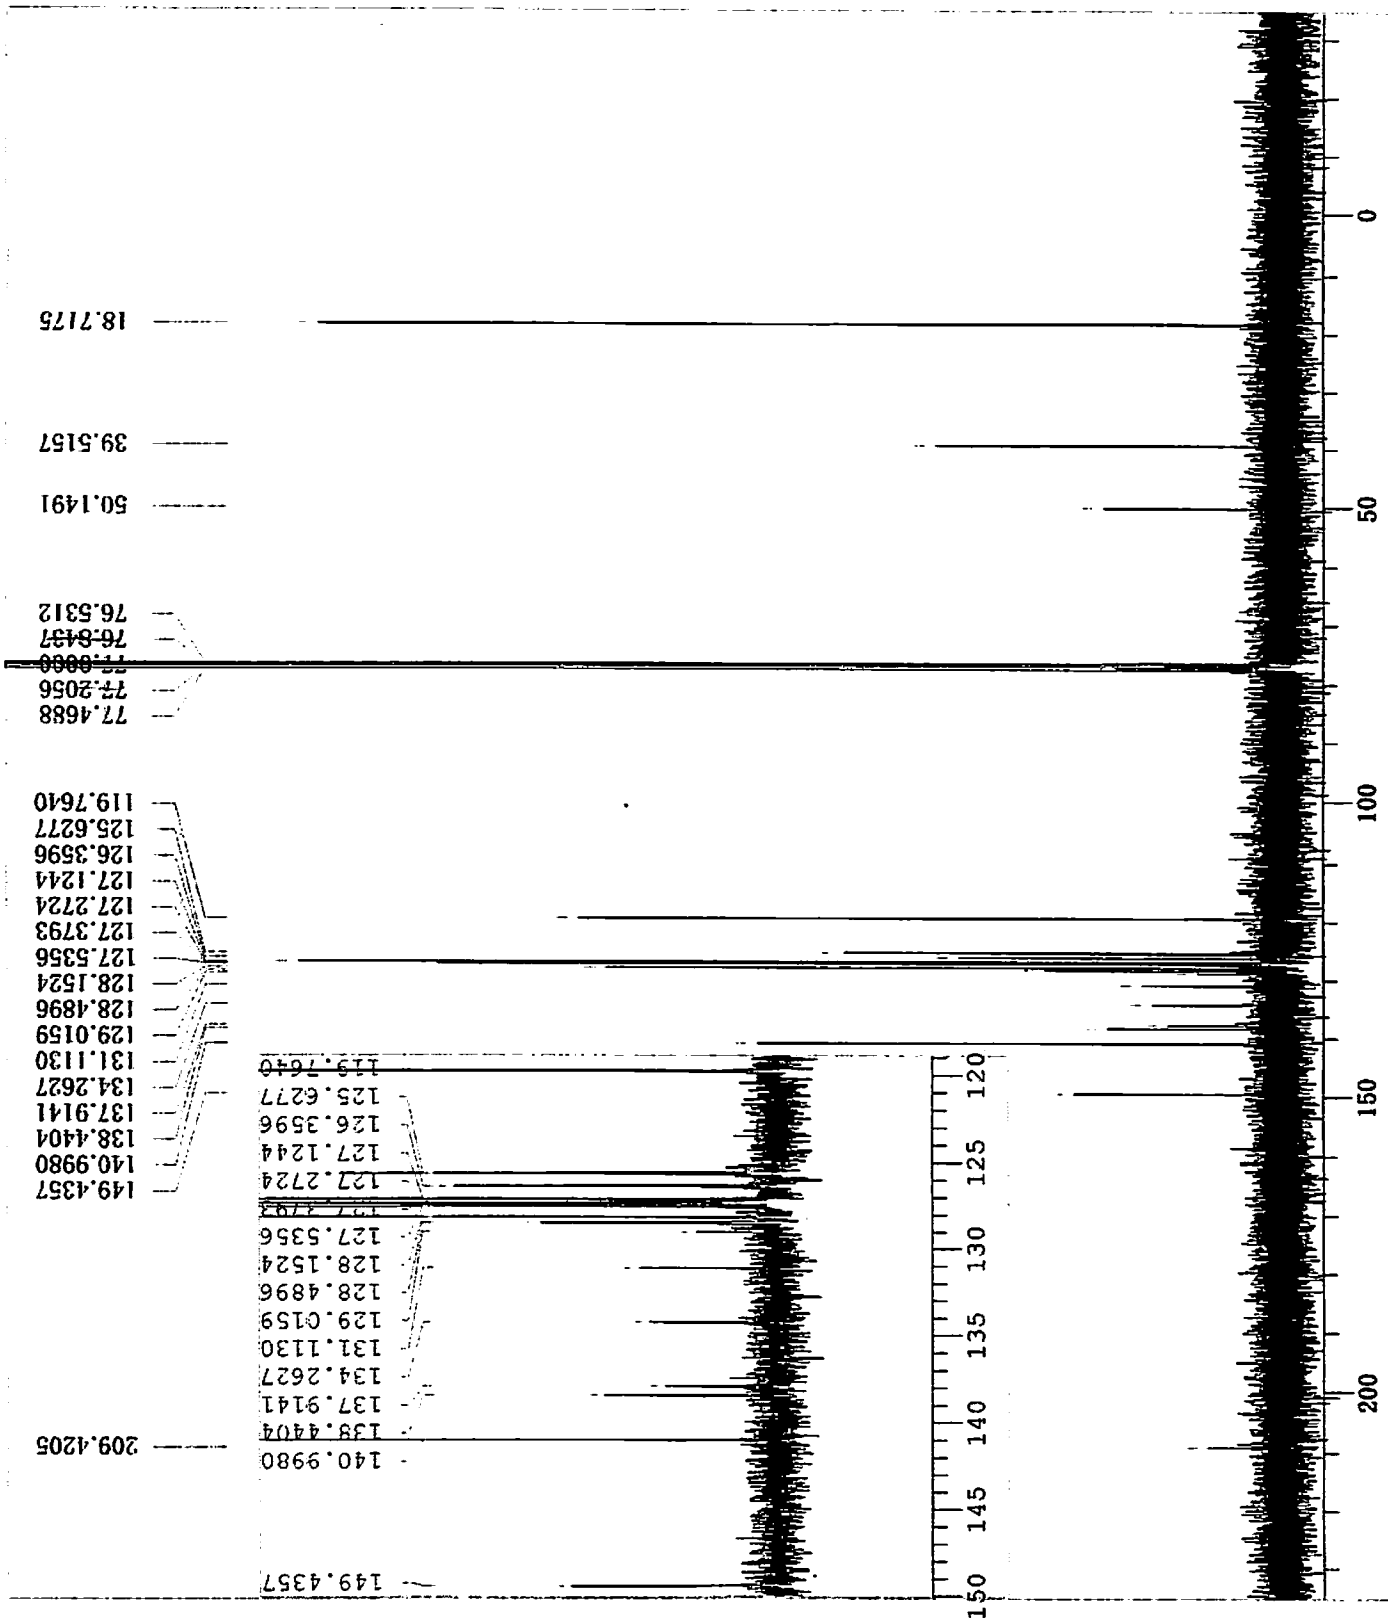

\_DEFAULT.ALS  
 Sat Sep 08 15:56:38 2007  
 1H  
 NON  
 270.05 MHz  
 112.00 KHz  
 5800.00 Hz  
 16384  
 5401.76 Hz  
 16  
 3.0331 sec  
 3.9670 sec  
 5.40 usec  
 1H 17.3 c  
 CDCL3  
 7.26 ppm  
 0.12 Hz  
 16

2-13-f  
 (60-f)

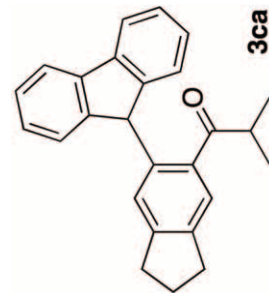

DRILE  
 COMNT  
 DATIM  
 OBNUC  
 EXMOD  
 OBFRQ  
 OBSET  
 OBRIN  
 POINT  
 FREQU  
 SCANS  
 ACQTM  
 PD  
 PW1  
 IRNUC  
 CTMP  
 SLVNT  
 EXREF  
 BF  
 RGAIN

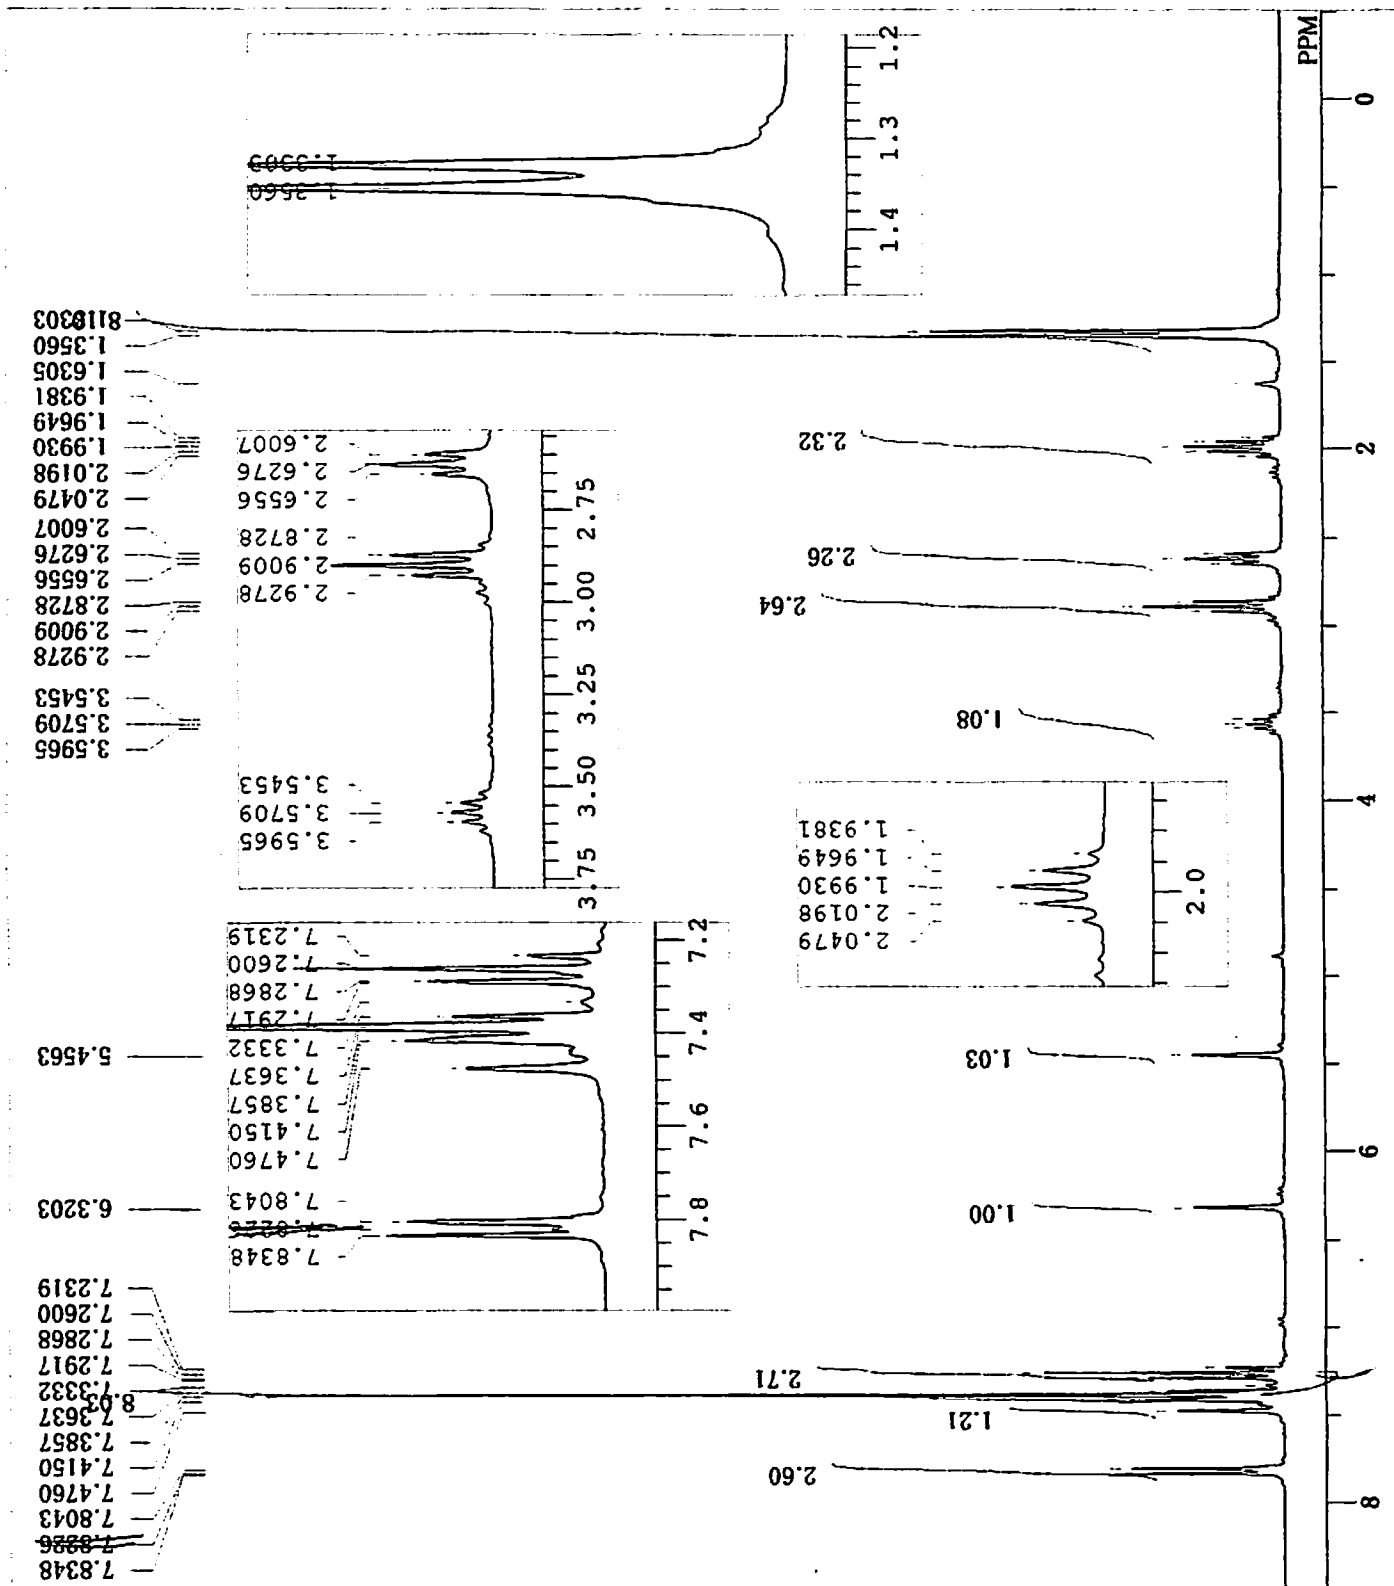

\_DEFAULT.ALS

Sat Sep 08 16:55:59 2007

13C  
BCM

67.80 MHz  
135.00 KHz  
5200.00 Hz  
32768  
18306.64 Hz  
1088  
1.7900 sec  
1.2100 sec  
3.50 usec

1H

CDCL3

18.8 c  
77.00 ppm  
0.12 Hz  
26

Supplementary Material (ESI) for Chemical Communications  
This journal is (c) The Royal Society of Chemistry 2008

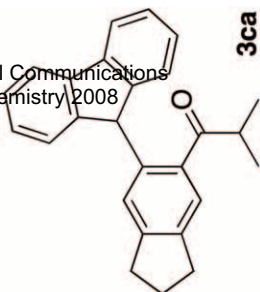

2-13-5.

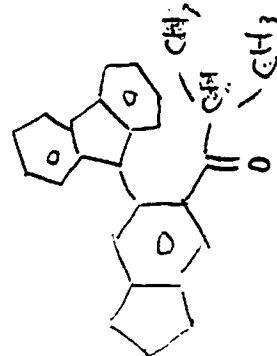

DRILE  
COMNT  
DATIM  
OBNUC  
EXMOD  
OBFRQ  
OBSET  
OBFIN  
POINT  
FREQU  
SCANS  
ACQTM  
PD  
PW1  
IRNUC  
CTEMP  
SLVNT  
EXREF  
BF  
RGAIN

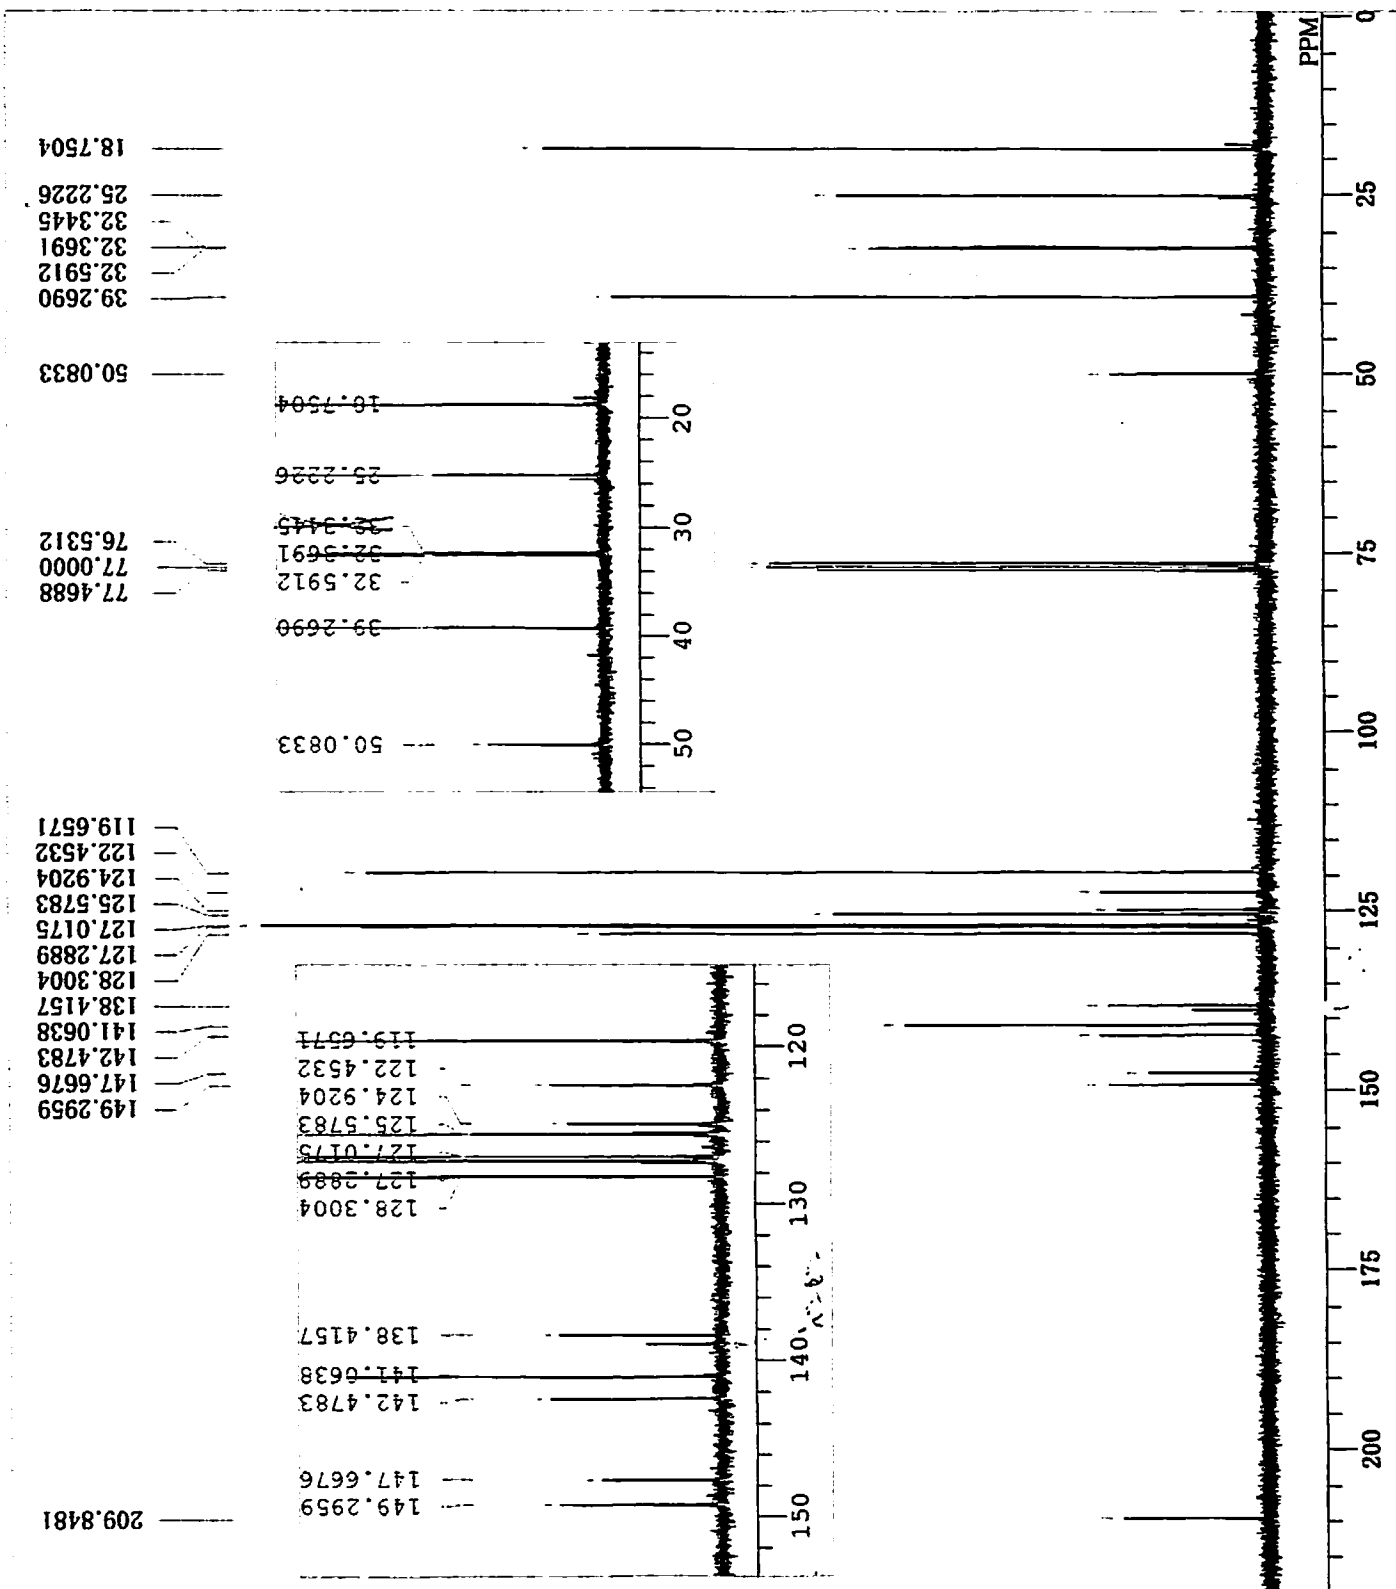

DFIL 1  
 COMNT  
 DATIM  
 OBNUC  
 EXMOD  
 OBFRQ  
 OBSET  
 OBFIN  
 POINT  
 FREQU  
 SCANS  
 ACQTM  
 PD  
 PW1  
 IRNUC  
 CTMPT  
 SLVNT  
 EXREF  
 BF  
 RGAIN

\_DEFAULT.ALS  
 ike  
 FRI Jul 13 17:04:33 2007  
 1H  
 NON

Supplementary Material (ESI) for Chemical Communications  
 This journal is (c) The Royal Society of Chemistry 2008

270.05 MHz  
 112.00 KHz  
 5800.00 Hz  
 16384  
 5401.76 Hz  
 16  
 3.0331 sec  
 3.9670 sec  
 5.40 usec  
 1H  
 17.1 c  
 CDCL3  
 7.25 ppm  
 0.12 Hz  
 21

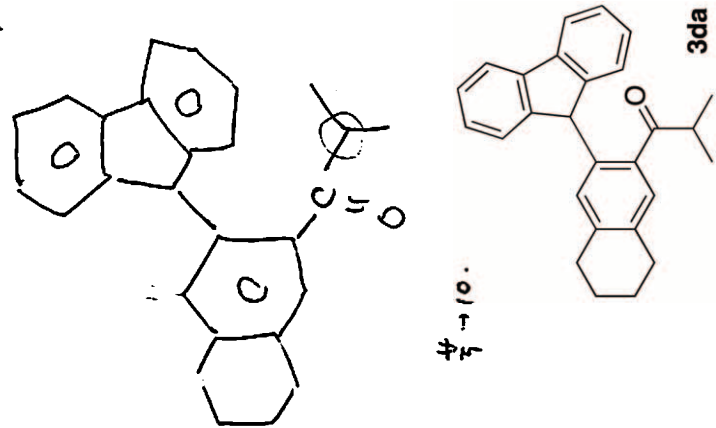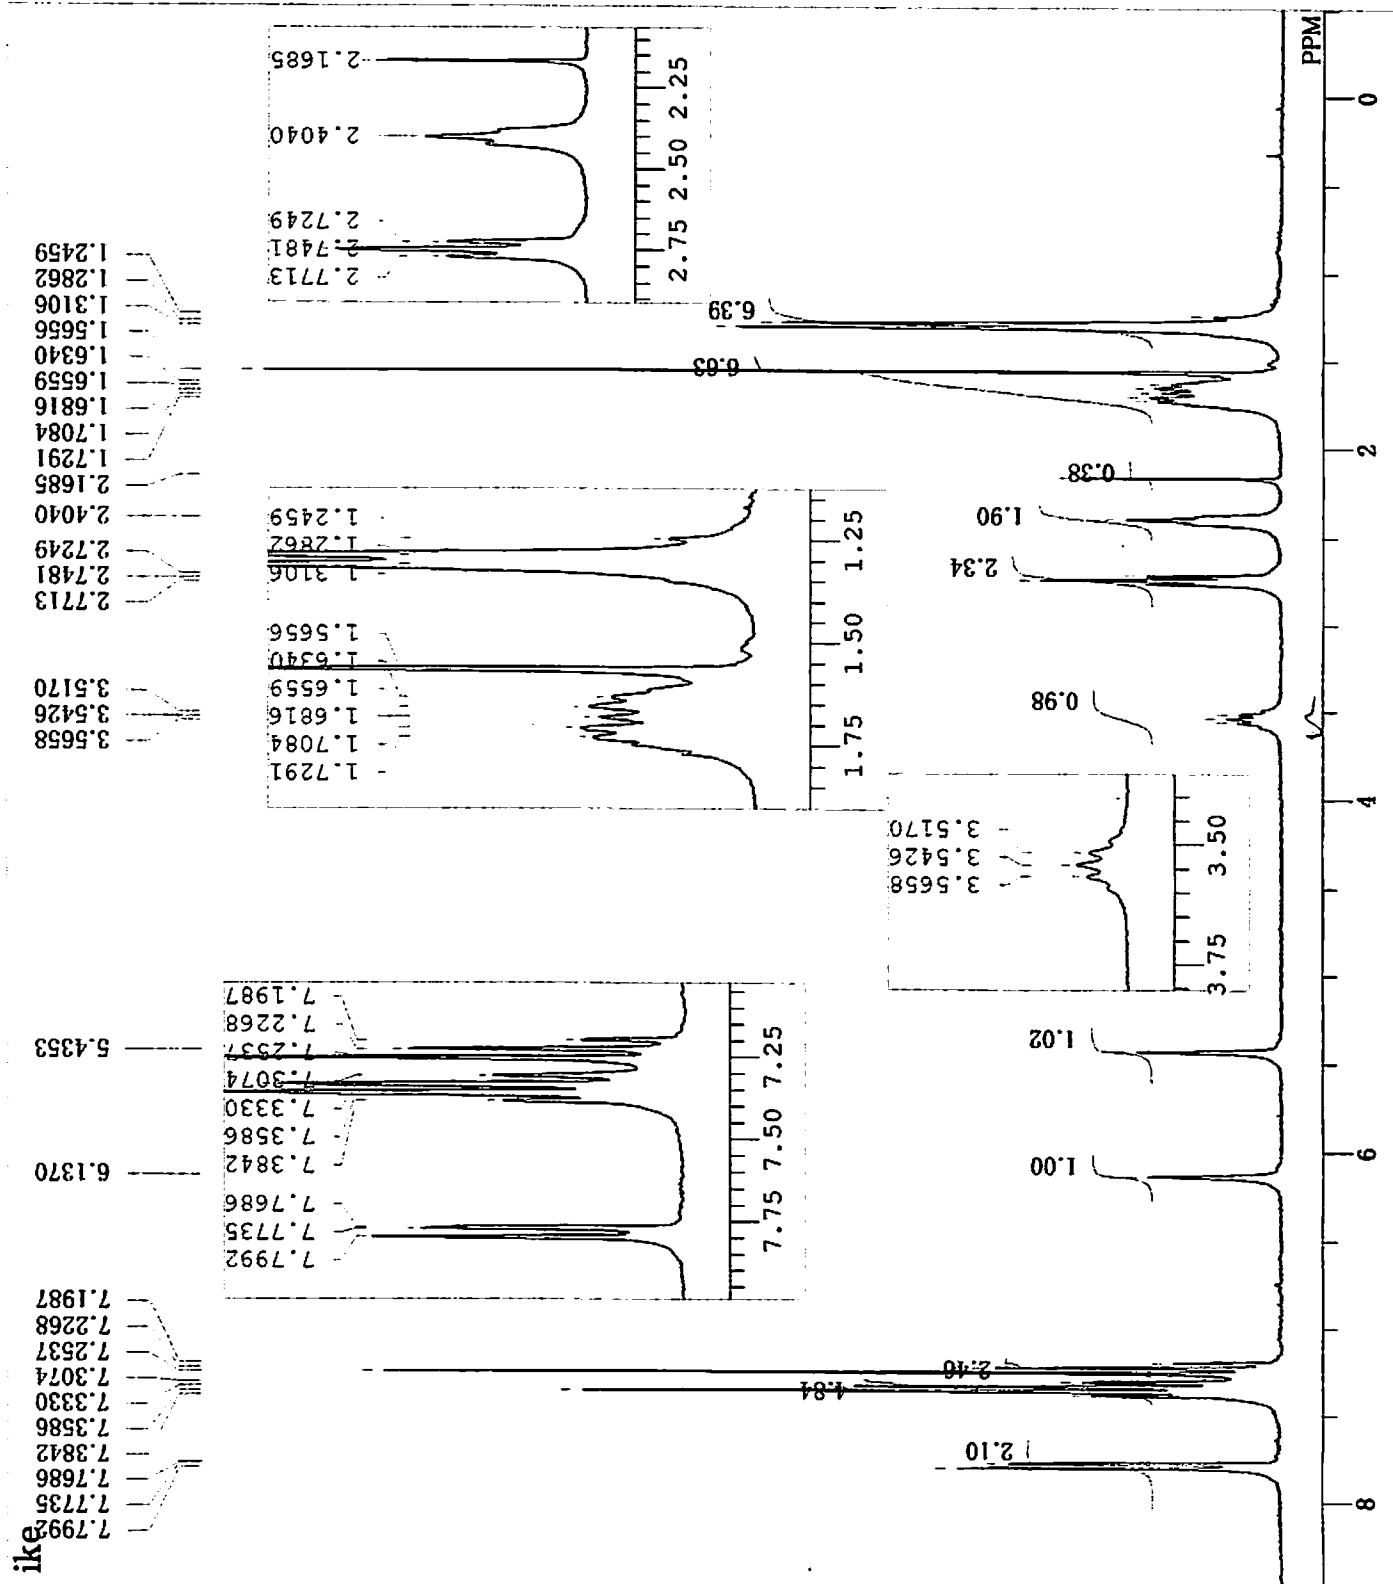

\_DEFAULT.ALS  
Fri Jan 25 17:52:33 2008

Supplementary Material (ESI) for Chemical Communications  
This journal is (c) The Royal Society of Chemistry 2008

DRILE  
COMNT  
DATIM  
OBNUC  
EXMOD  
OBFRQ  
OBSET  
OBFIN  
POINT  
FREQU  
SCANS  
ACQTM  
PD  
PWI  
IRNUC  
CTEMP  
SLVNT  
EXREF  
BF  
RGAIN

67.80 MHz  
135.00 KHz  
5200.00 Hz  
32768  
18306.64 Hz  
774  
1.7900 sec  
1.2100 sec  
3.50 usec  
1H  
13.6 c  
CDCL3  
77.00 ppm  
0.12 Hz  
26

137-4

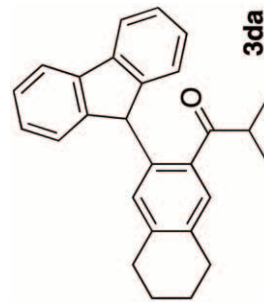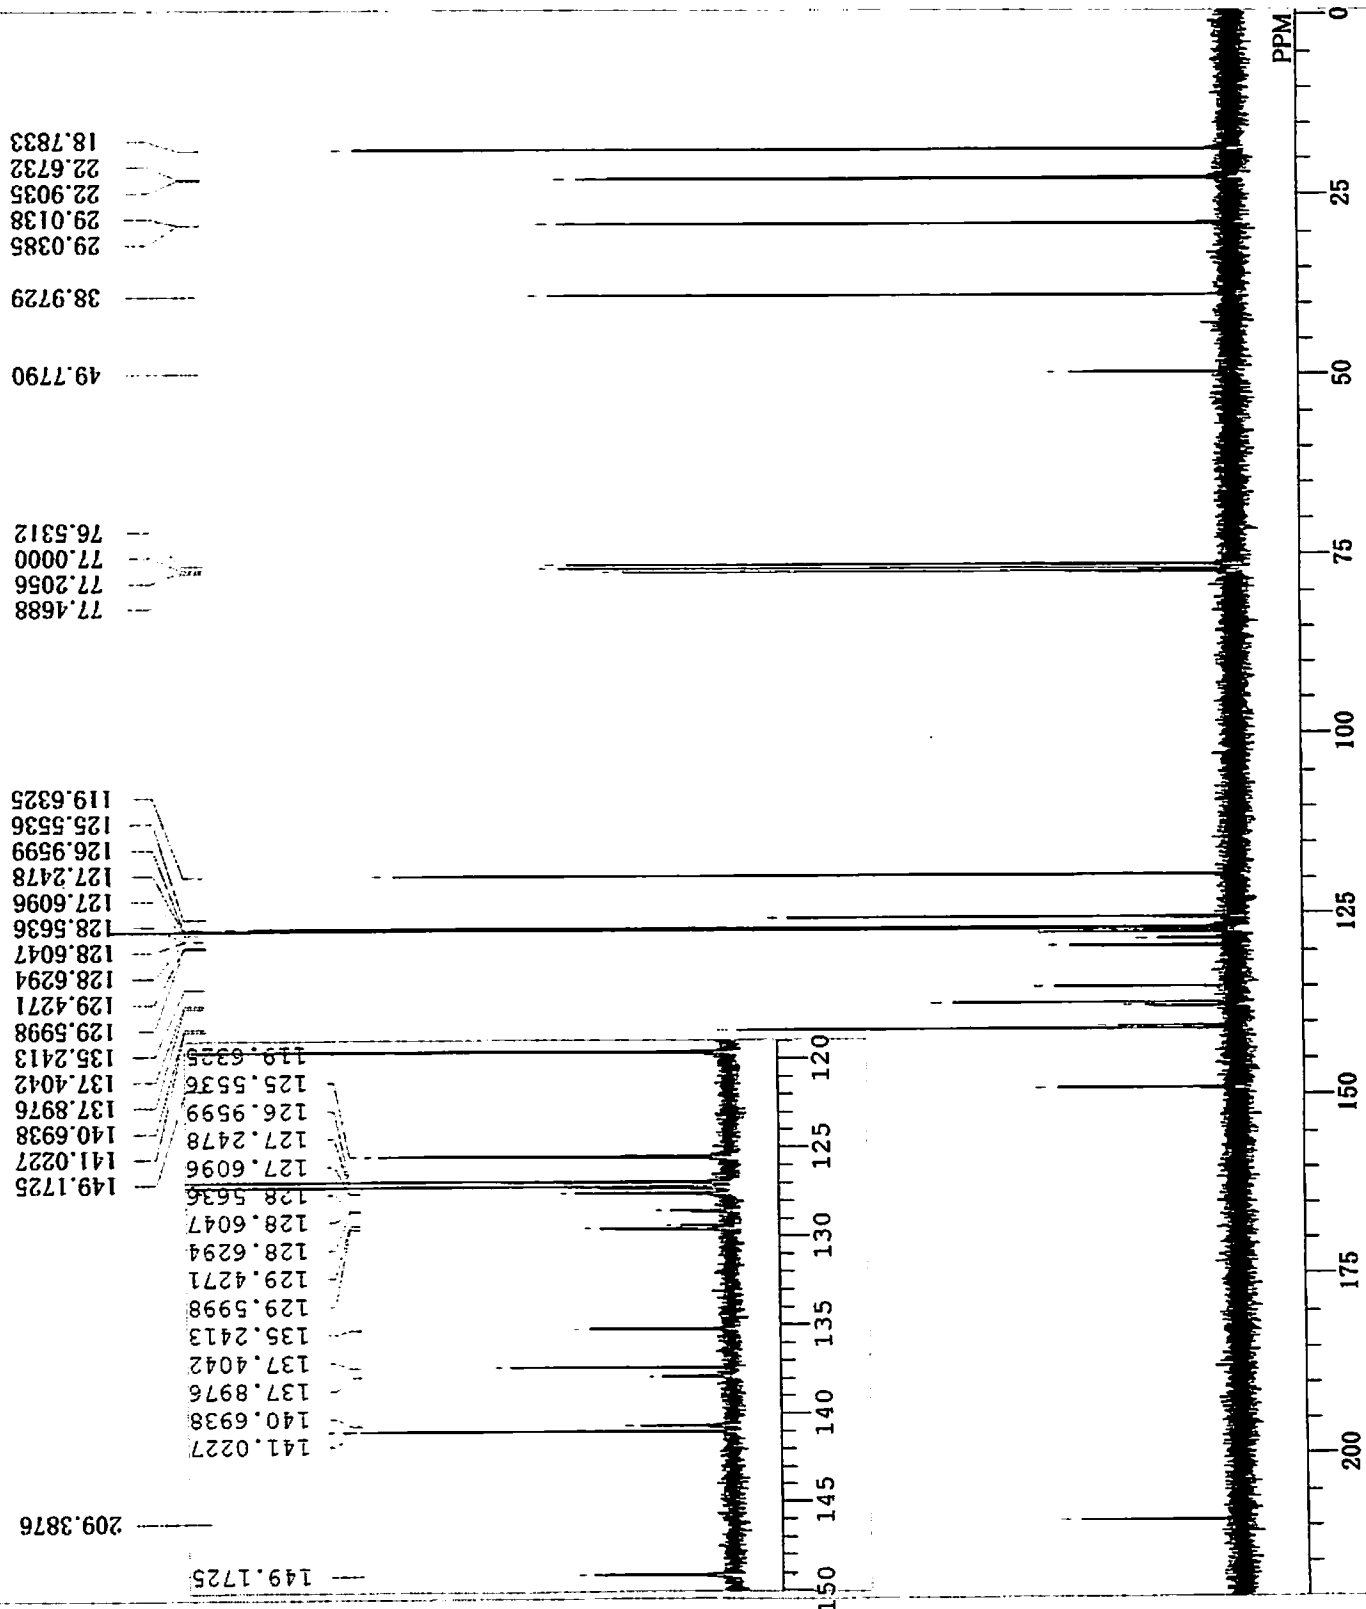

\_DEFAULT.ALS  
methoxy  
Fri Aug 03 15:08:00 2007  
1H  
NON

Supplementary Material (ESI) for Chemical Communications  
This journal is (c) The Royal Society of Chemistry 2008

DRFILE  
COMNT  
DATIM  
OBNUC  
EXMOD  
OBFRQ  
OBSET  
OBFIN  
POINT  
FREQU  
SCANS  
ACQTM  
PD  
PW1  
IRNUC  
CTEMP  
SLVNT  
EXREF  
BF  
RGAIN

270.05 MHz  
112.00 KHz  
5800.00 Hz  
16384  
5401.76 Hz  
16  
3.0331 sec  
3.9670 sec  
5.40 usec  
1H  
16.7 c  
CDCL3  
7.26 ppm  
0.12 Hz  
16

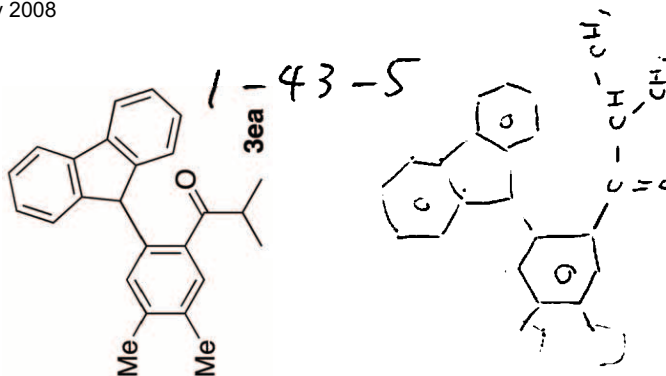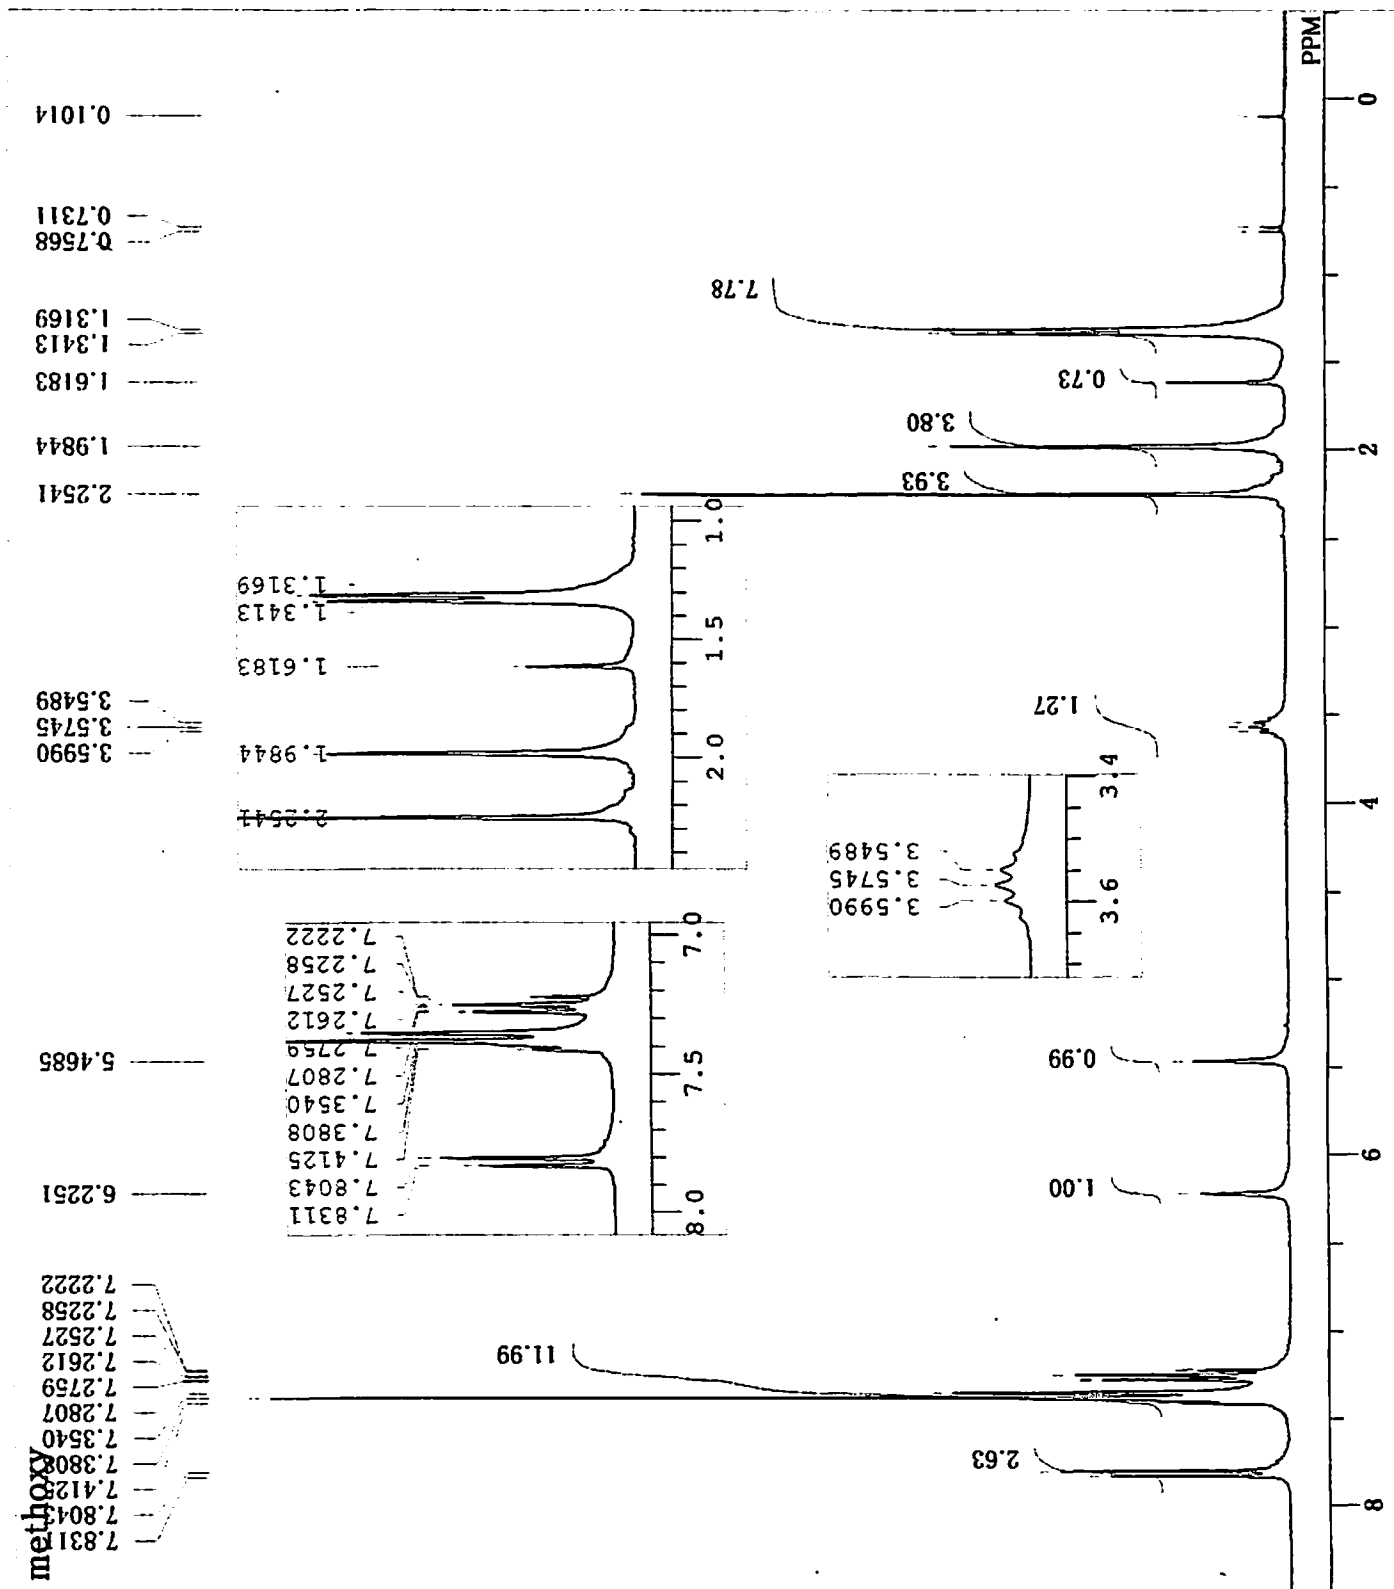

4,5-dimethyl

209.3629  
149.1397  
141.0721  
140.0934  
138.4404  
137.7496  
134.7397  
130.2083  
128.3086  
128.2017  
127.9961  
127.2889  
127.0093  
125.5290  
120.4960  
119.6736

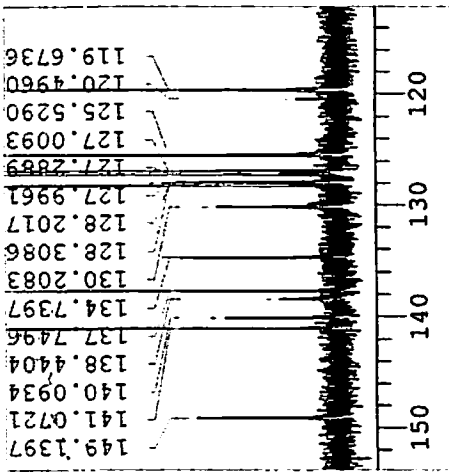

77.4770  
77.2056  
77.0000  
76.5312  
49.7626  
39.0716  
19.6222  
19.1741  
18.7587

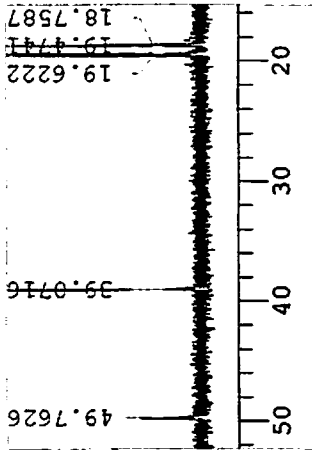

DFILE  
COMNT  
DATIM  
OBNUC  
EXMOD  
OBFRQ  
OBSET  
OBFIN  
POINT  
FREQU  
SCANS  
ACQTM  
PD  
PW1  
IRNUC  
CTEMP  
SLVNT  
EXREF  
BF  
RGAIN

\_DEFAULT.ALS  
4,5-dimethyl  
F1 Aug 03 16:37:24 2007  
13C  
BCM

Supplementary Material (ESI) for Chemical Communications  
This journal is (c) The Royal Society of Chemistry 2008

67.80 MHz  
135.00 KHz  
5200.00 Hz  
32768  
18306.64 Hz  
1716  
1.7900 sec  
1.2100 sec  
3.50 usec  
1H  
19.2 c  
CDCl3  
77.00 ppm  
0.12 Hz  
26

1-436

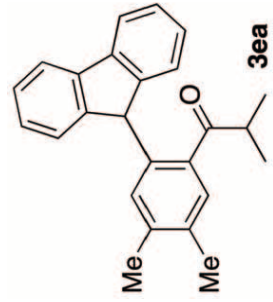

DEFAULT.ALS

Tue Aug 07 15:39:38 2007

Supplementary Material (ESI) for Chemical Communications  
This journal is (c) The Royal Society of Chemistry 2008

DFILF  
 COMNT  
 DATIM  
 OBNUC  
 EXMOD  
 OBFRQ  
 OBSET  
 OBFIN  
 POINT  
 FREQU  
 SCANS  
 ACQTM  
 PD  
 PW1  
 IRNUC  
 CTEMP  
 SLVNT  
 EXREF  
 BF  
 RGAIN

270.05 MHz  
 112.00 KHz  
 5800.00 Hz  
 16384  
 5401.76 Hz  
 16  
 3.0331 sec  
 3.9670 sec  
 5.40 usec  
 1H  
 18.1 c  
 CDCL3  
 7.26 ppm  
 0.12 Hz  
 13

2-1-3

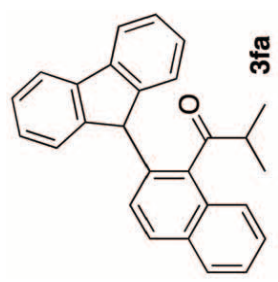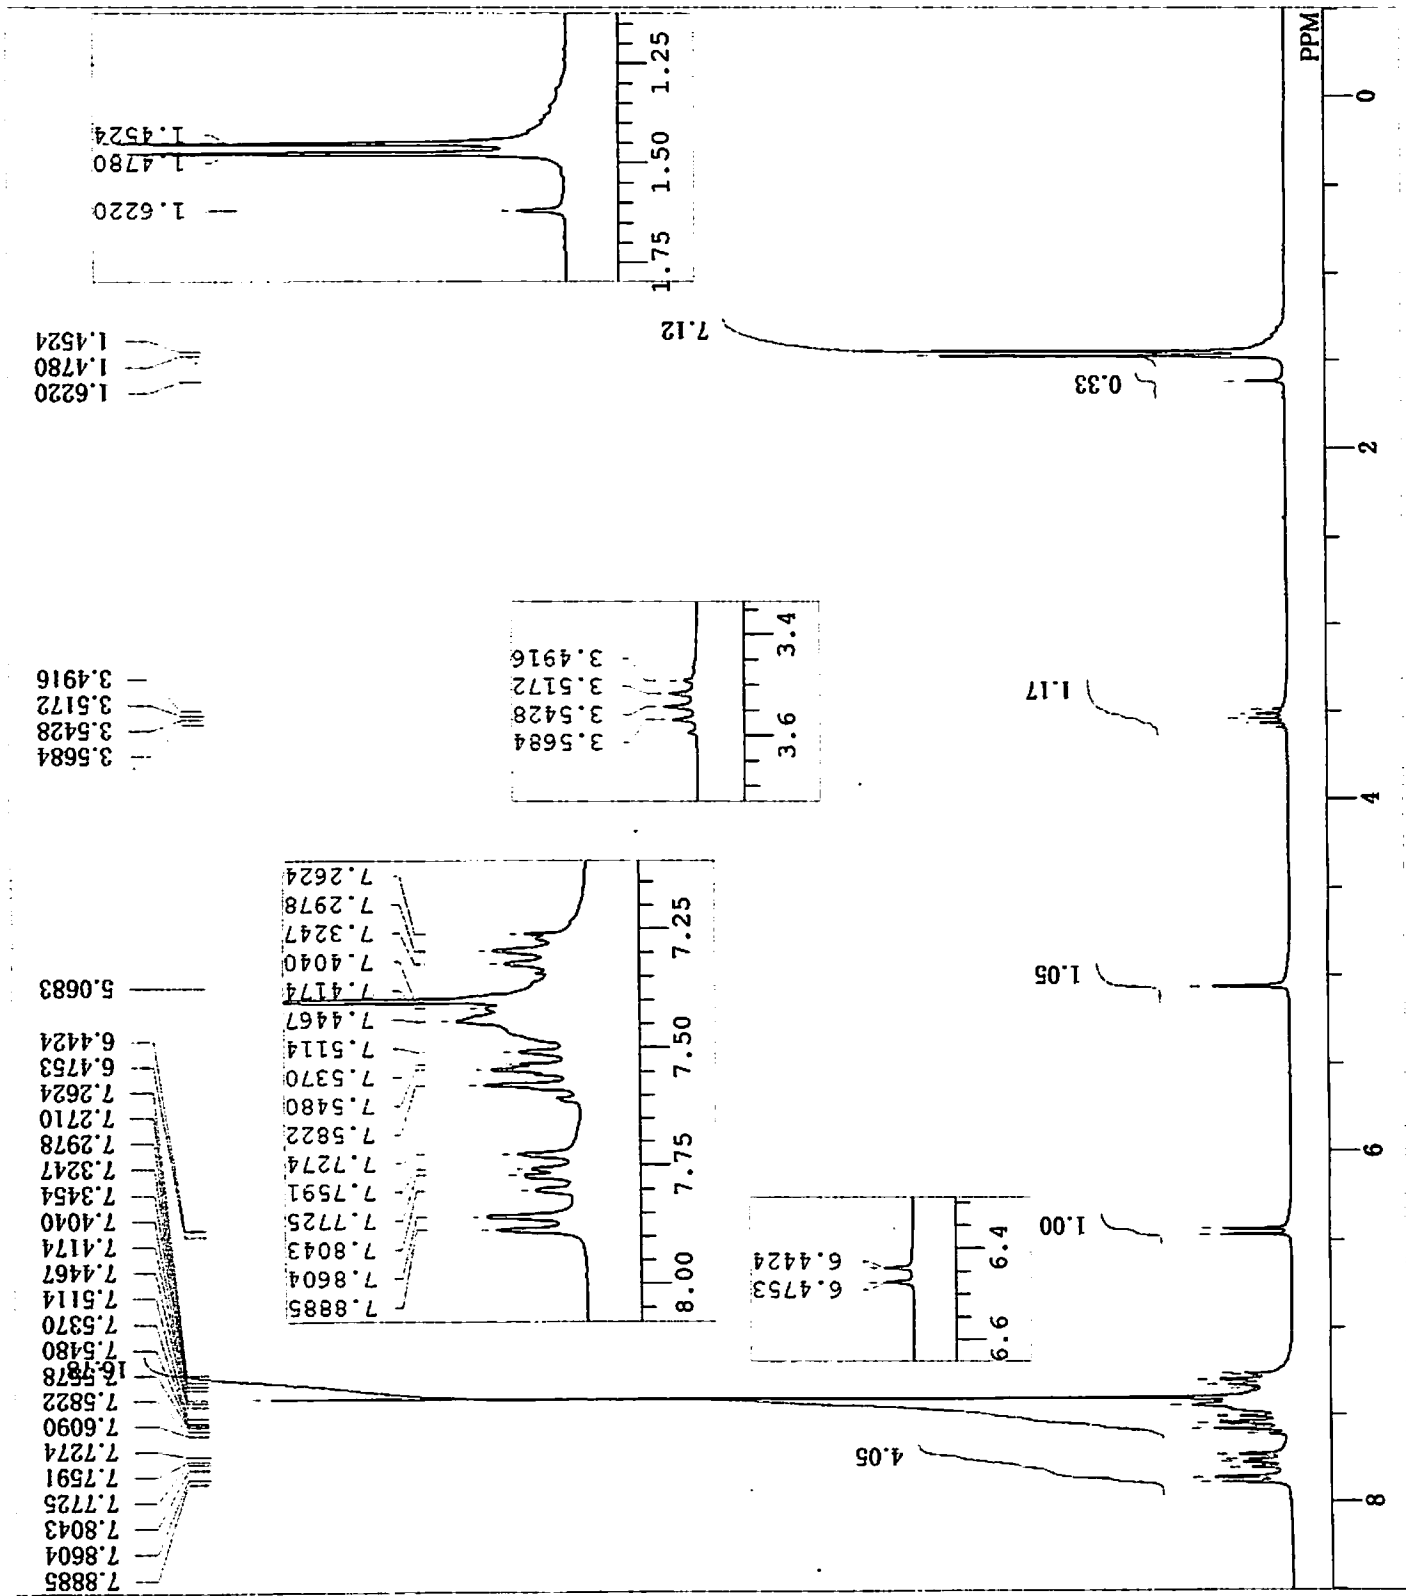



\_DEFAULT.ALS  
 Tue Aug 07 17:44:03 2007  
 13C  
 BCM

Supplementary Material (ESI) for Chemical Communications  
 This journal is (c) The Royal Society of Chemistry 2008

67.80 MHz  
 135.00 KHz  
 5200.00 Hz  
 32768  
 18306.64 Hz  
 2404  
 1.7900 sec  
 1.2100 sec  
 3.50 usec  
 1H  
 20.1 c  
 CDCL3  
 77.00 ppm  
 0.12 Hz  
 28  
 CH<sub>2</sub>-CH<sub>2</sub>

DFILE  
 COMNT  
 DATIM  
 OBNUC  
 EXMOD  
 OBFRQ  
 OBSET  
 OBFIN  
 POINT  
 FREQU  
 SCANS  
 ACQTM  
 PD  
 PW1  
 IRNUC  
 CTEMP  
 SLVNT  
 EXREF  
 BF  
 RGAIN

<sup>13</sup>C NMR

2-1-9

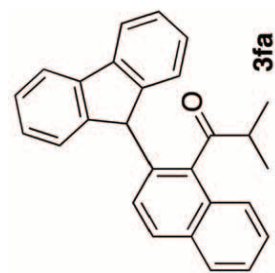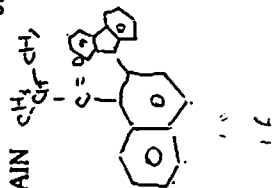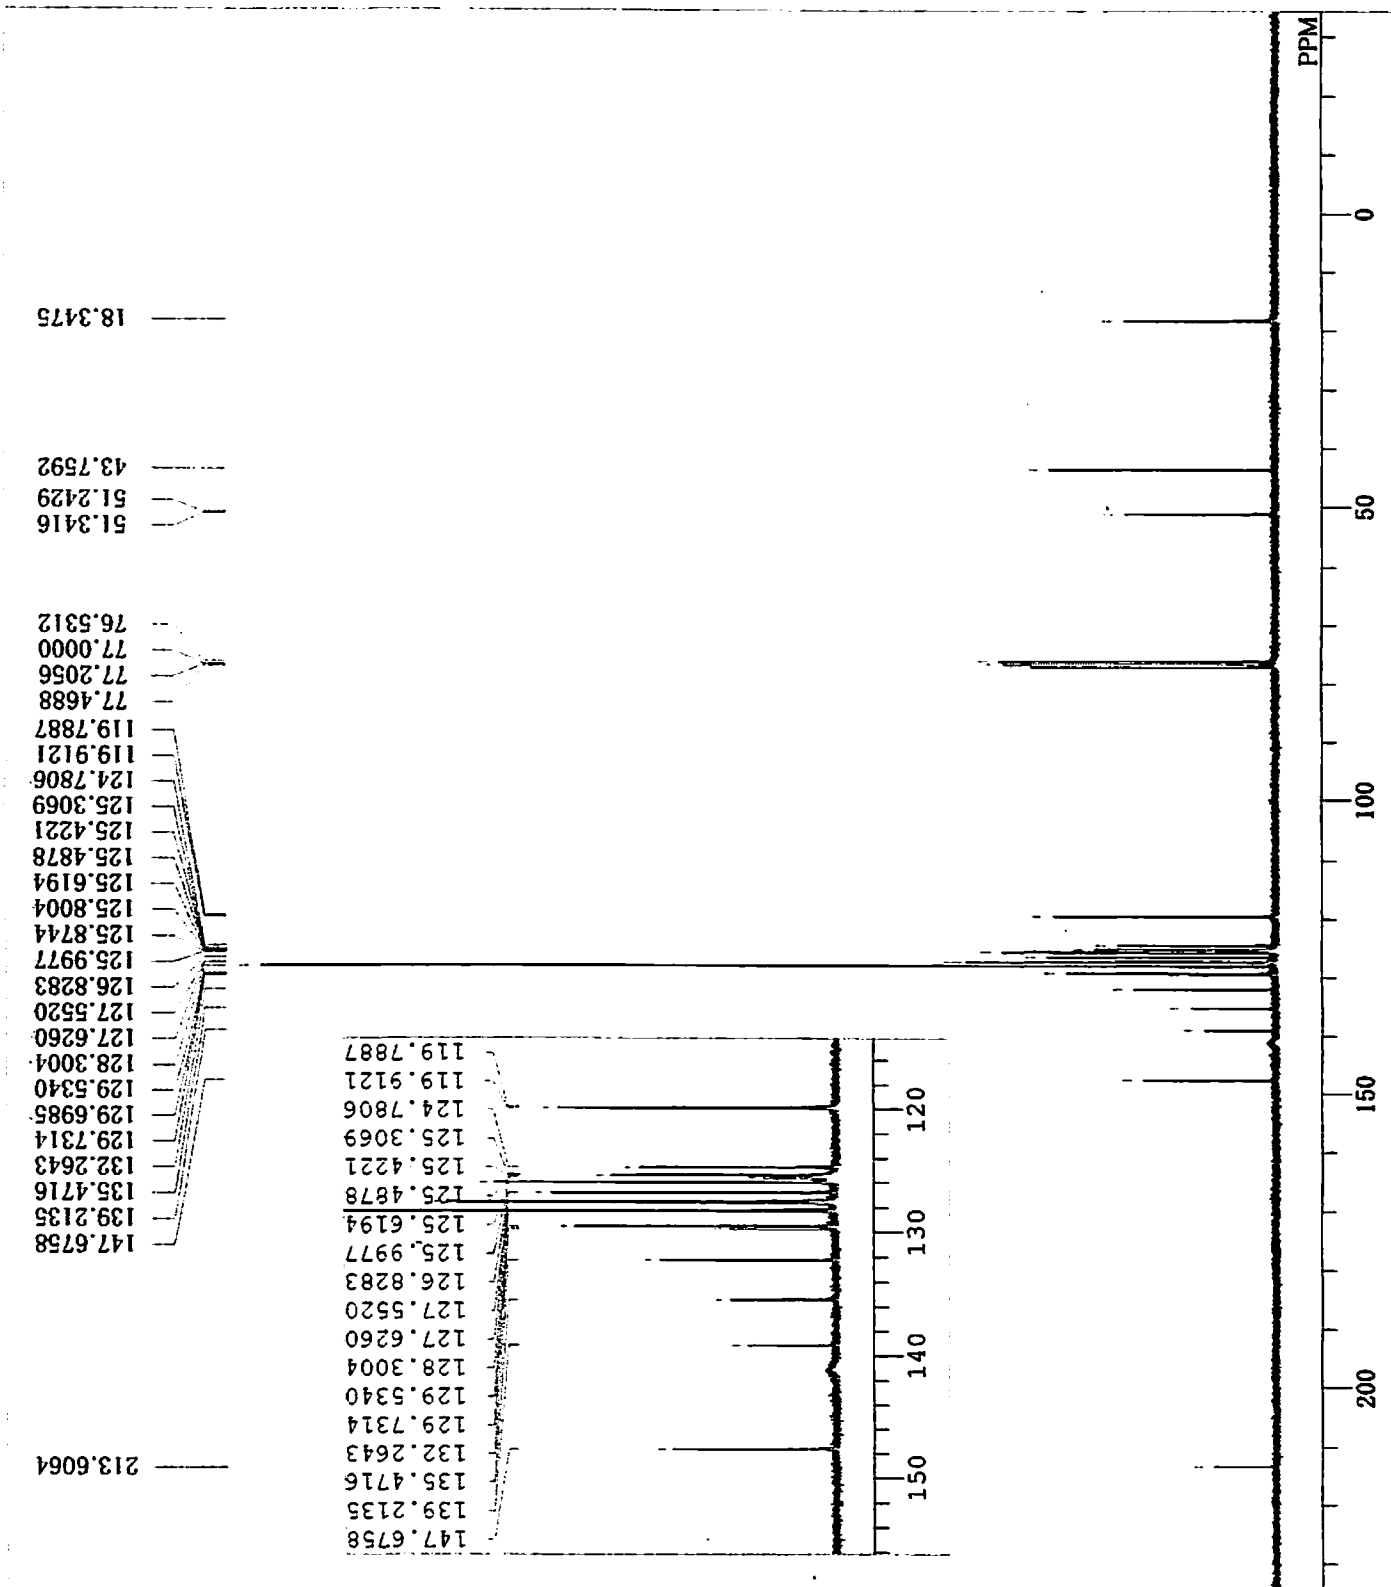

\_DEFAULT.ALS

Sat Aug 11 14:51:55 2007

Supplementary Material (ESI) for Chemical Communications  
This journal is (c) The Royal Society of Chemistry 2008

2-2-4.

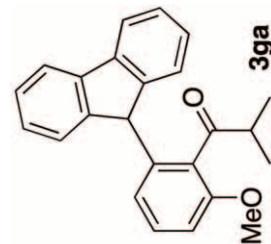

DRILE  
COMNT  
DATIM  
OBNUC  
EXMOD  
OBFRQ  
OBSET  
OBRIN  
POINT  
FREQU  
SCANS  
ACQTM  
PD  
PW1  
IRNUC  
CTEMP  
SLVNT  
EXREF  
BF  
RGAIN

270.05 MHz  
112.00 KHz  
5800.00 Hz  
16384  
5401.76 Hz  
16  
3.0331 sec  
3.9670 sec  
5.40 usec

1H  
17.6 c  
CDCL3  
7.26 ppm  
0.12 Hz  
16

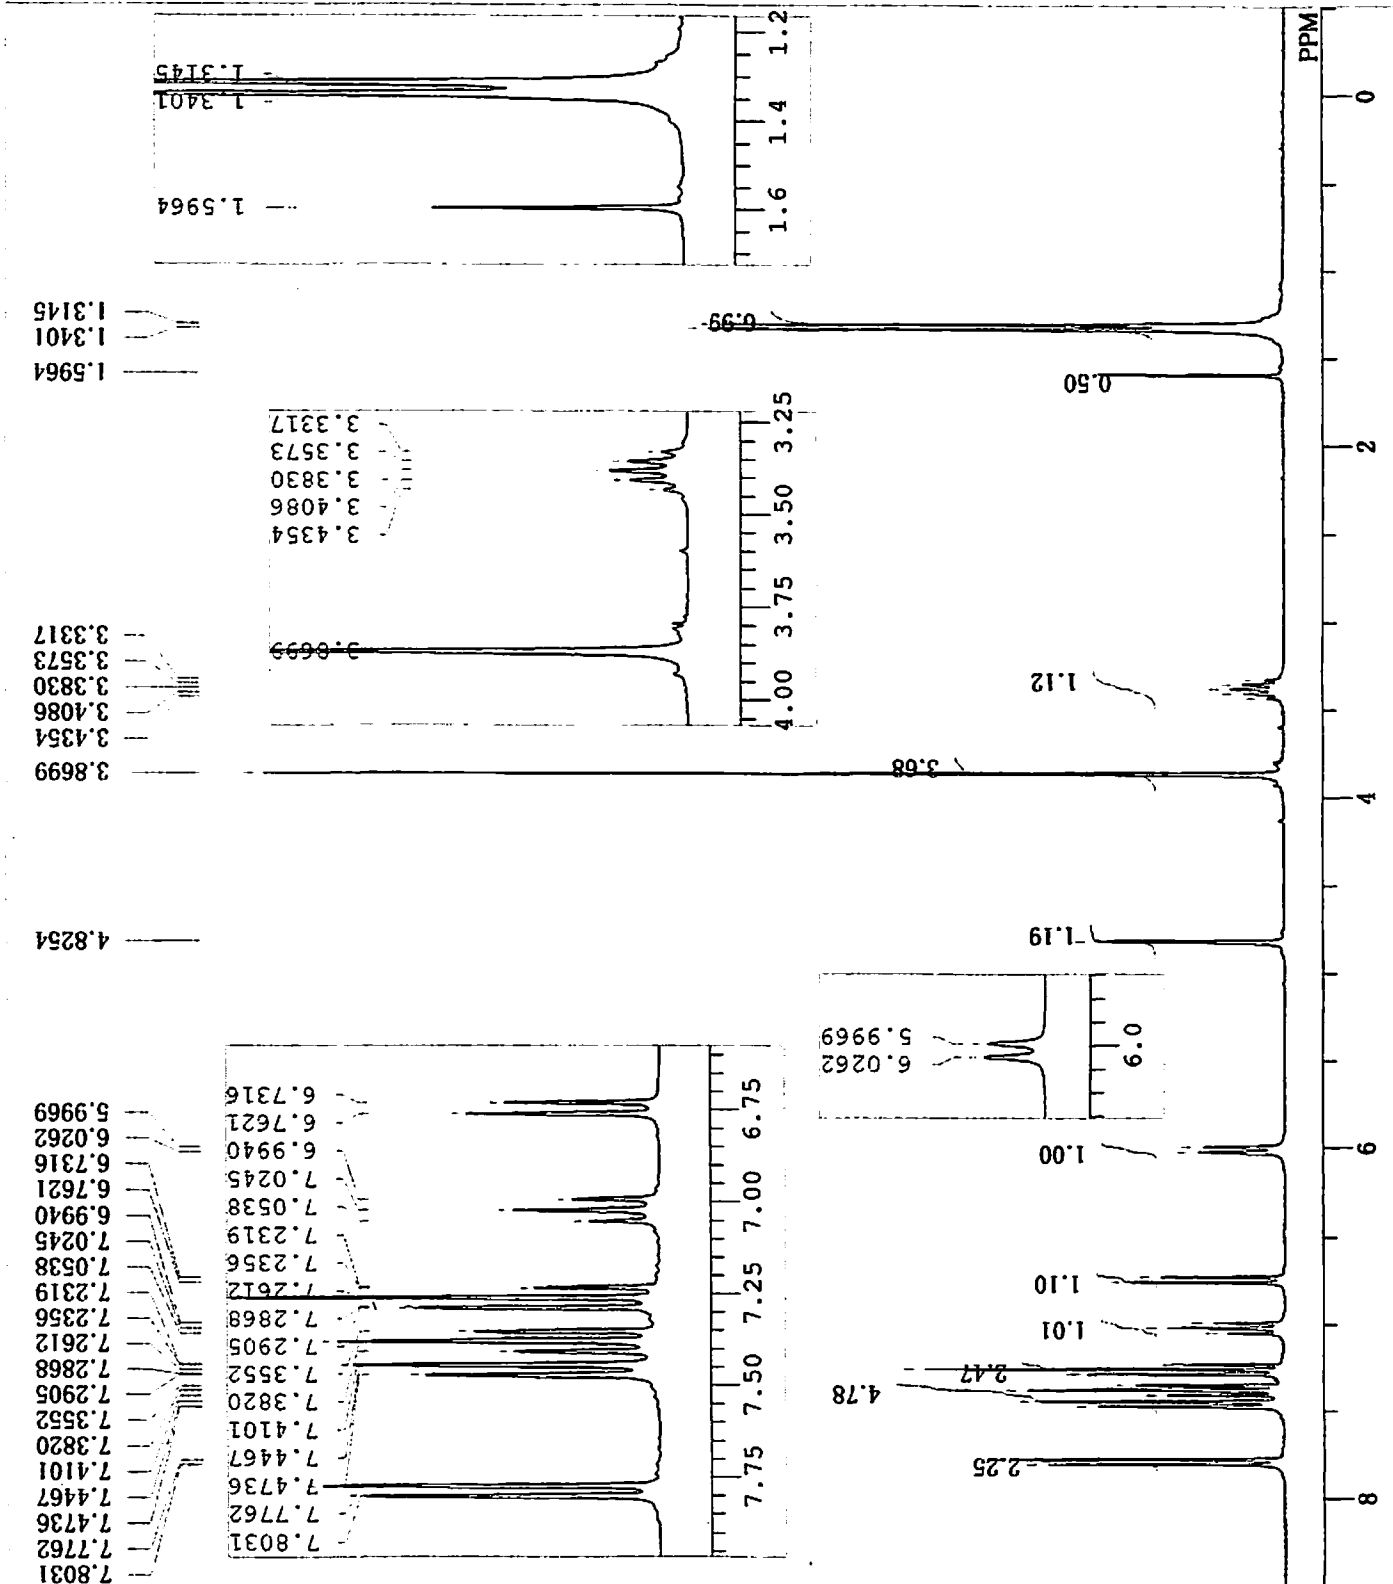

\_DEFAULT.ALS

Sat Aug 11 16:33:13 2007

Supplementary Material (ESI) for Chemical Communications  
This journal is (c) The Royal Society of Chemistry 2008

DFILE COMNT  
DATIM DATIM  
OBNUC OBNUC  
EXMOD EXMOD  
OBFRQ OBFRQ  
OBSET OBSET  
OBFIN OBFIN  
POINT POINT  
FREQU FREQU  
SCANS SCANS  
ACQTM ACQTM  
PD PD  
PW1 PW1  
IRNUC IRNUC  
CTEMP CTEMP  
SLVNT SLVNT  
EXREF EXREF  
BF BF  
RGAIN RGAIN

67.80 MHz  
135.00 KHz  
5200.00 Hz  
32768  
18306.64 Hz  
1919  
1.7900 sec  
1.2100 sec  
3.50 usec  
1H 19.7 c  
CDCL3  
77.00 ppm  
0.12 Hz  
26

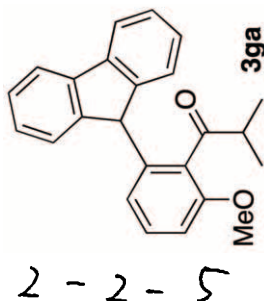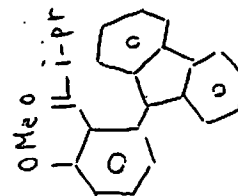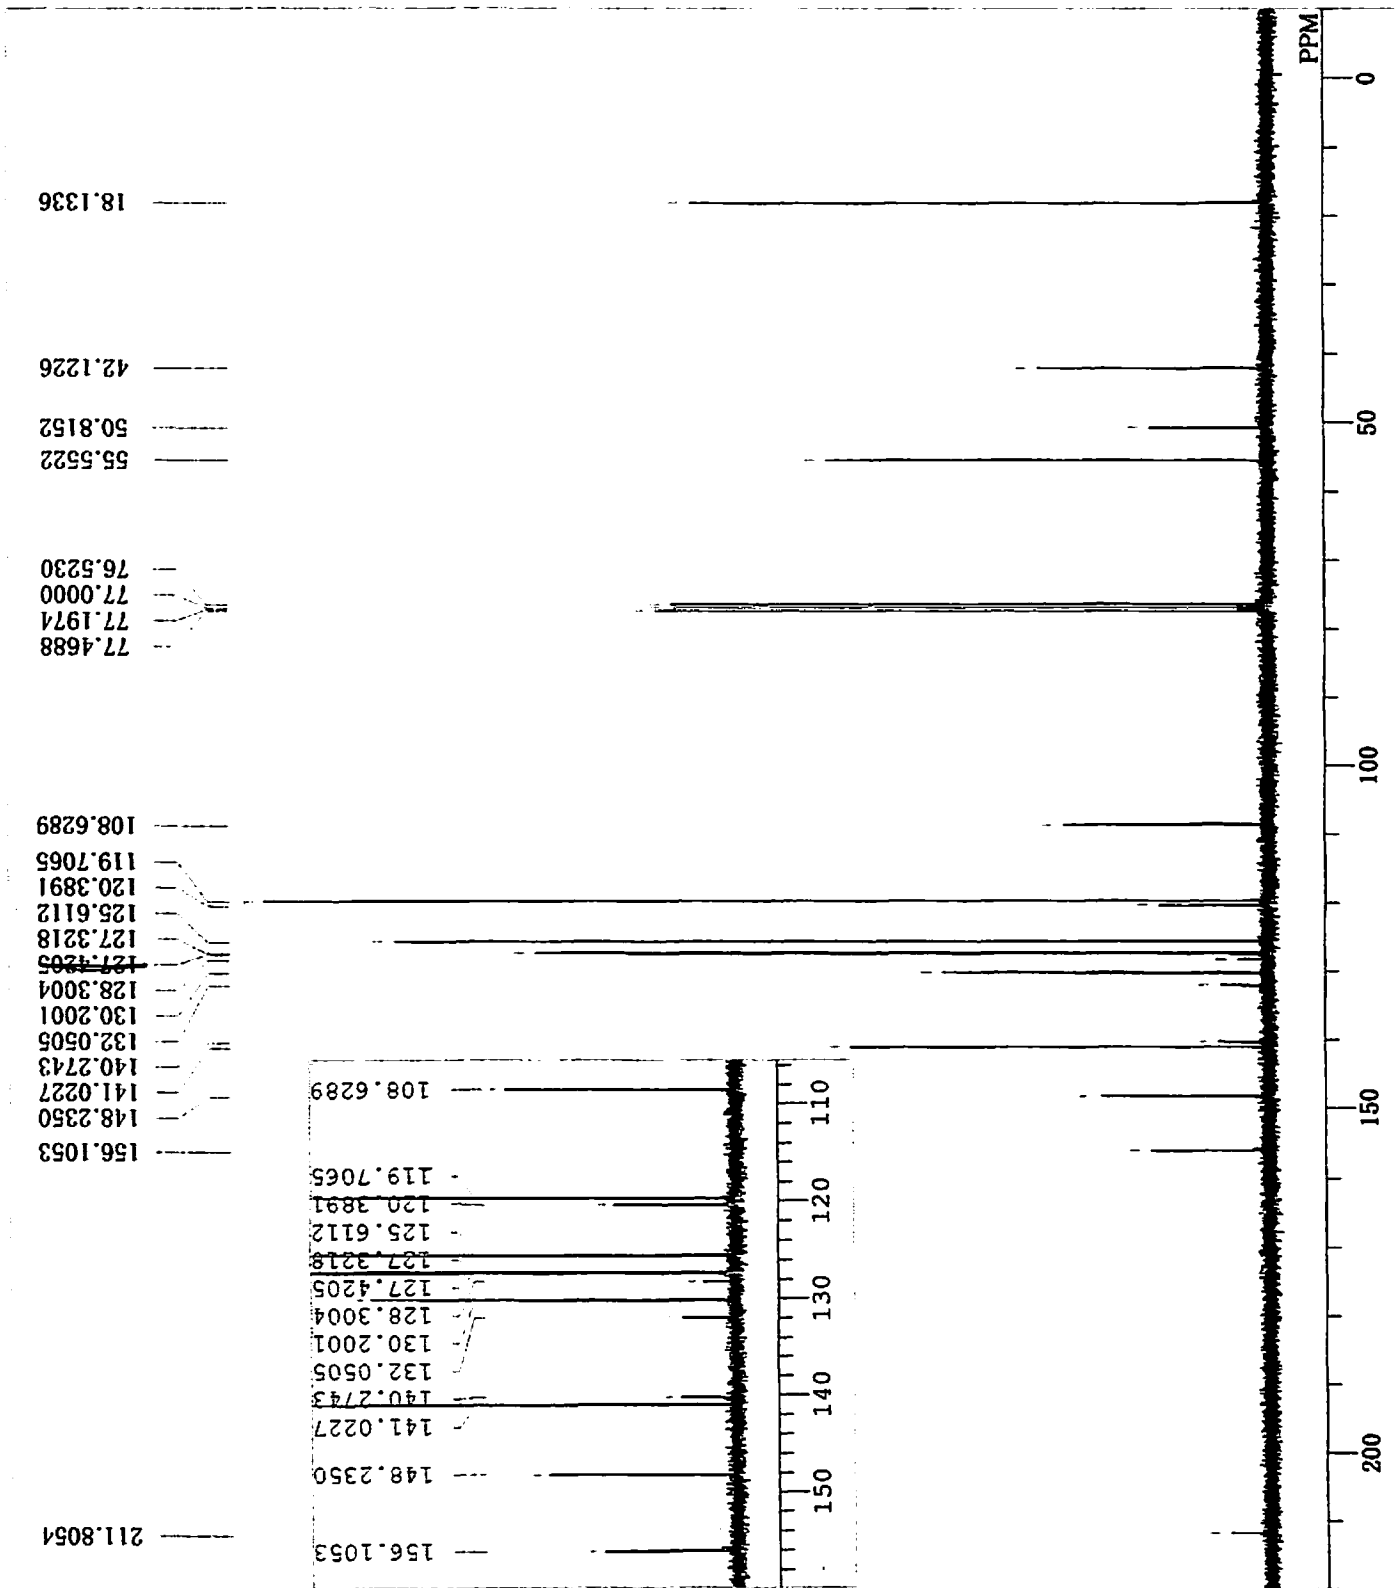

DEFAULT.ALS  
 Mon Nov 26 14:08:18 2007

Supplementary Material (ESI) for Chemical Communications  
 This journal is (c) The Royal Society of Chemistry 2008

DFILE  
 COMNT  
 DATIM  
 OBNUC  
 EXMOD  
 OBFRQ  
 OBSSET  
 OBFIN  
 POINT  
 FREQU  
 SCANS  
 ACQTM  
 PD  
 PW1  
 IRNUC  
 CTEMP  
 SLVNT  
 EXREF  
 BF  
 RGAIN

270.05 MHz  
 112.00 KHz  
 5800.00 Hz  
 16384  
 5401.76 Hz  
 16  
 3.0331 sec  
 3.9570 sec  
 5.40 usec  
 1H  
 17.4 c  
 CDCL3  
 7.26 ppm  
 0.12 Hz  
 15

51-7

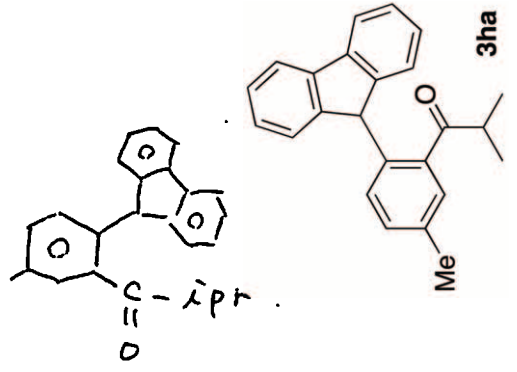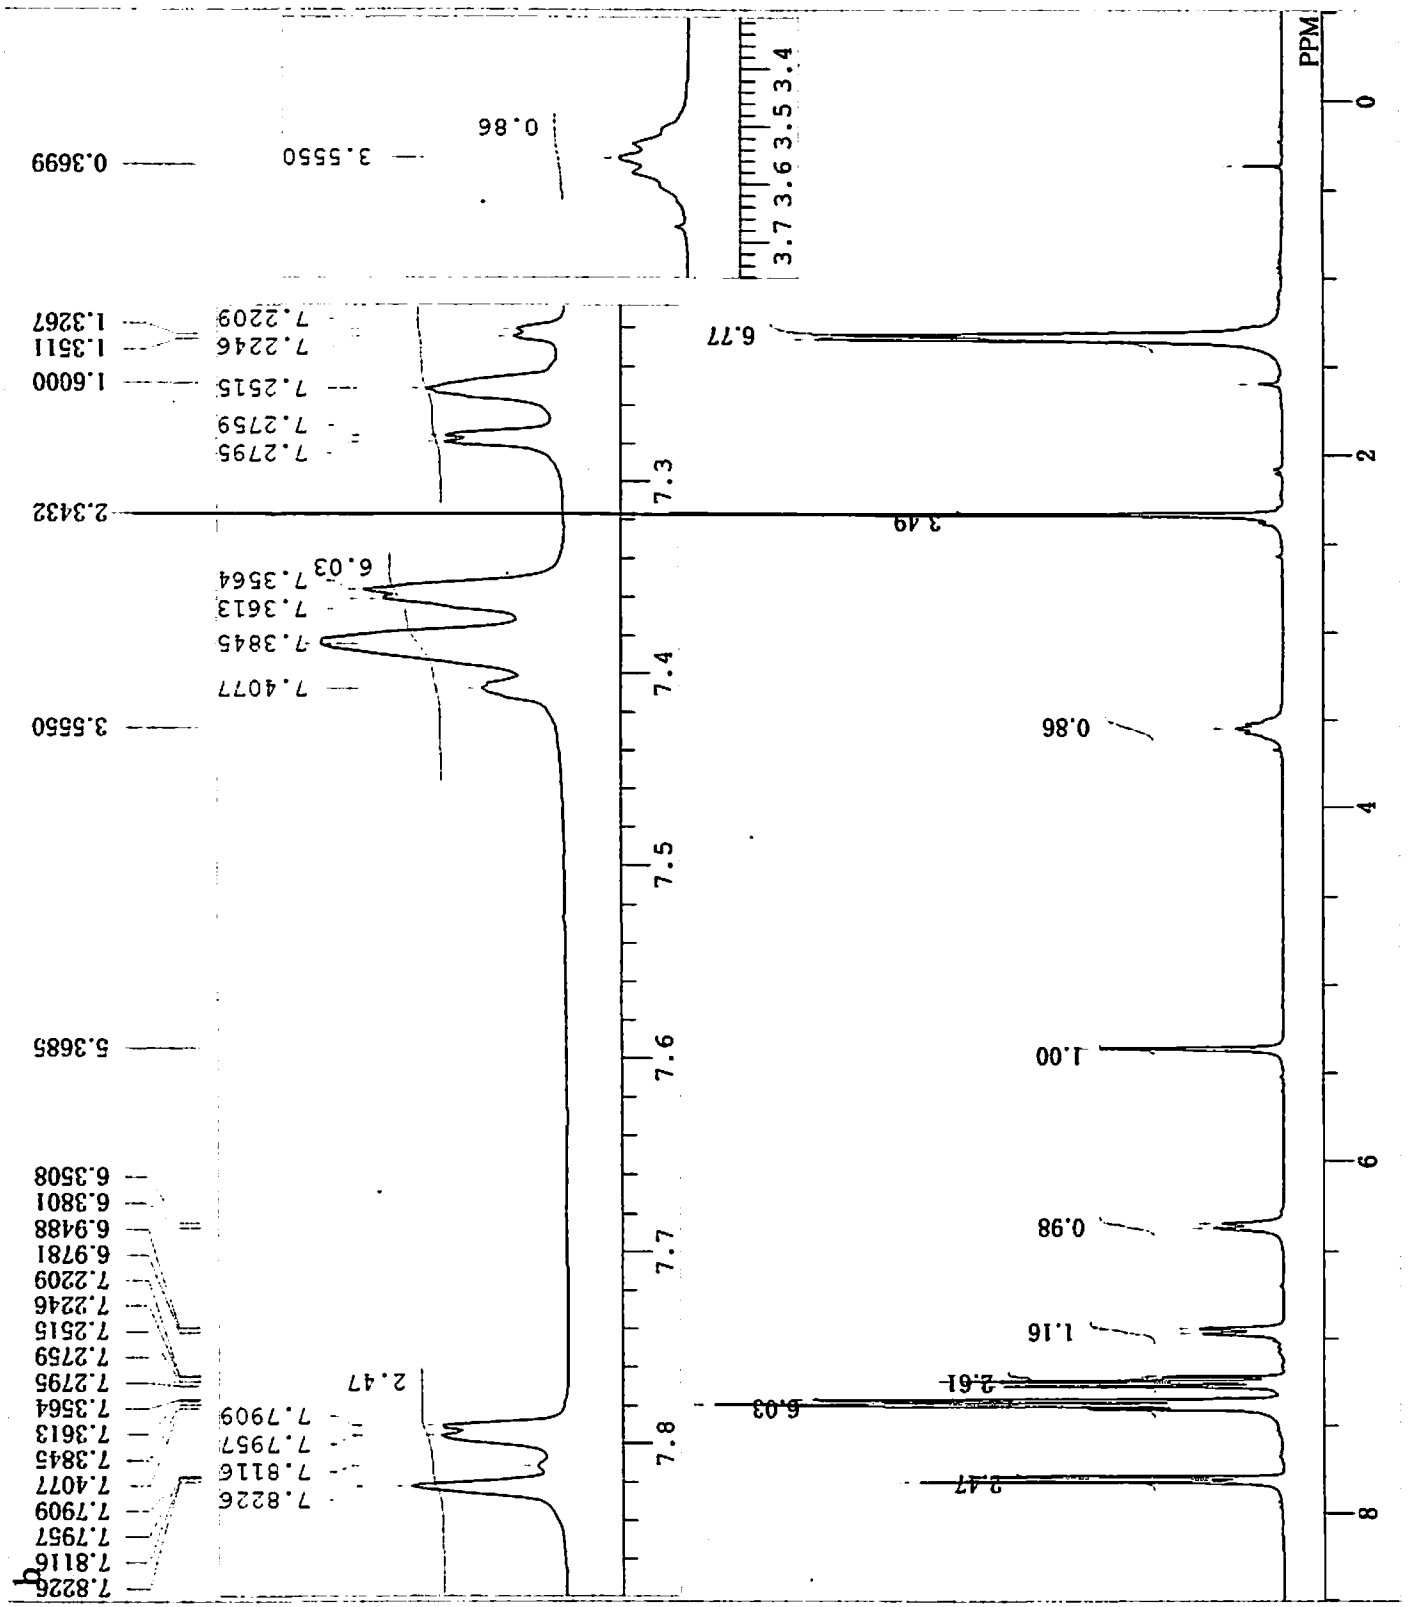

DEFAULT.ALS

Tue Nov 27 14:57:00 2007

Supplementary Material (ESI) for Chemical Communications  
This journal is (c) The Royal Society of Chemistry 2008

DFILE  
COMNT  
DATIM  
OBNUC  
EXMOD  
OBFRQ  
OBSET  
OBFIN  
POINT  
FREQU  
SCANS  
ACQTM  
PD  
PW1  
IRNUC  
CTEMP  
SLVNT  
EXREF  
BF  
RGAIN

67.80 MHz  
135.00 KHz  
5200.00 Hz  
32768  
18306.64 Hz  
638  
1.7900 sec  
1.2100 sec  
3.50 usec  
1H  
21.4 c  
CDCL3  
77.00 ppm  
0.12 Hz  
27

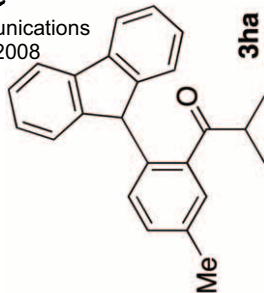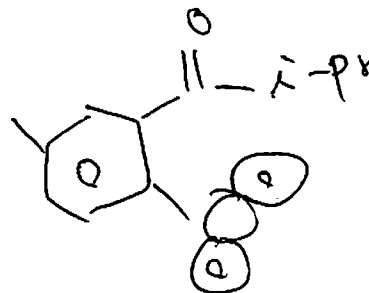

51-9

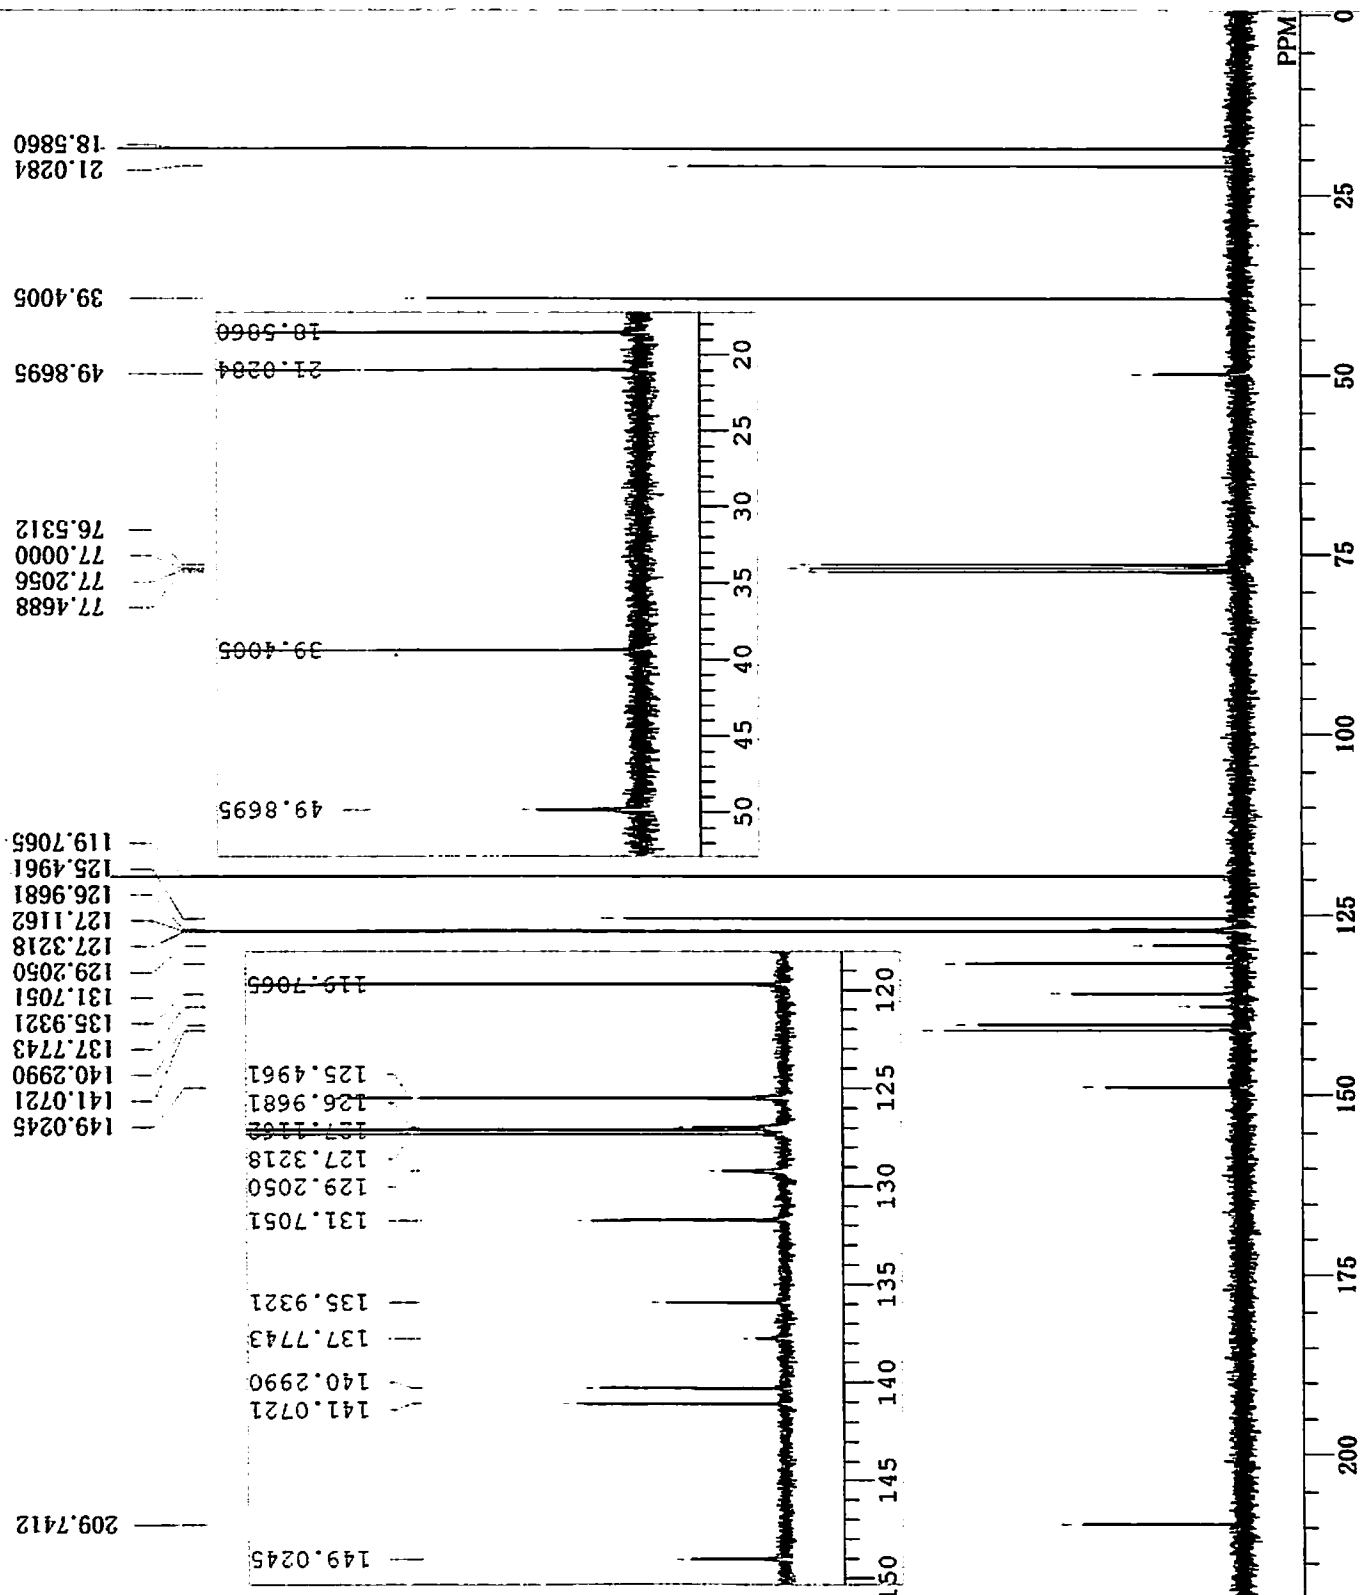



\_DEFAULT.ALS  
 Mon Nov 26 18:49:46 2007  
 13C  
 BCM  
 67.80 MHz  
 135.00 KHz  
 5200.00 Hz  
 32768  
 18306.64 Hz  
 846  
 1.7900 sec  
 1.2100 sec  
 3.50 usec  
 1H  
 20.9 c  
 CDCL3  
 77.00 ppm  
 0.12 Hz  
 28  
 DFIL  
 COMNT  
 DATIM  
 OBNUC  
 EXMOD  
 OBFRQ  
 OBSET  
 OBFIN  
 POINT  
 FREQU  
 SCANS  
 ACQTM  
 PD  
 PW1  
 IRNUC  
 CTEMP  
 SLVNT  
 EXREF  
 BF  
 RGAIN

Supplementary Material (ESI) for Chemical Communications  
 This journal is (c) The Royal Society of Chemistry 2008

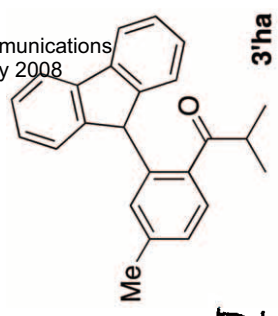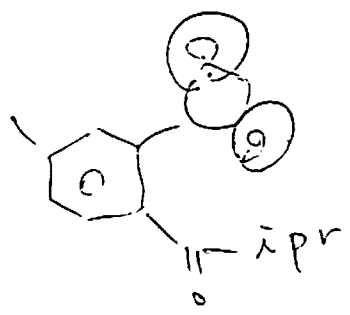

51-8

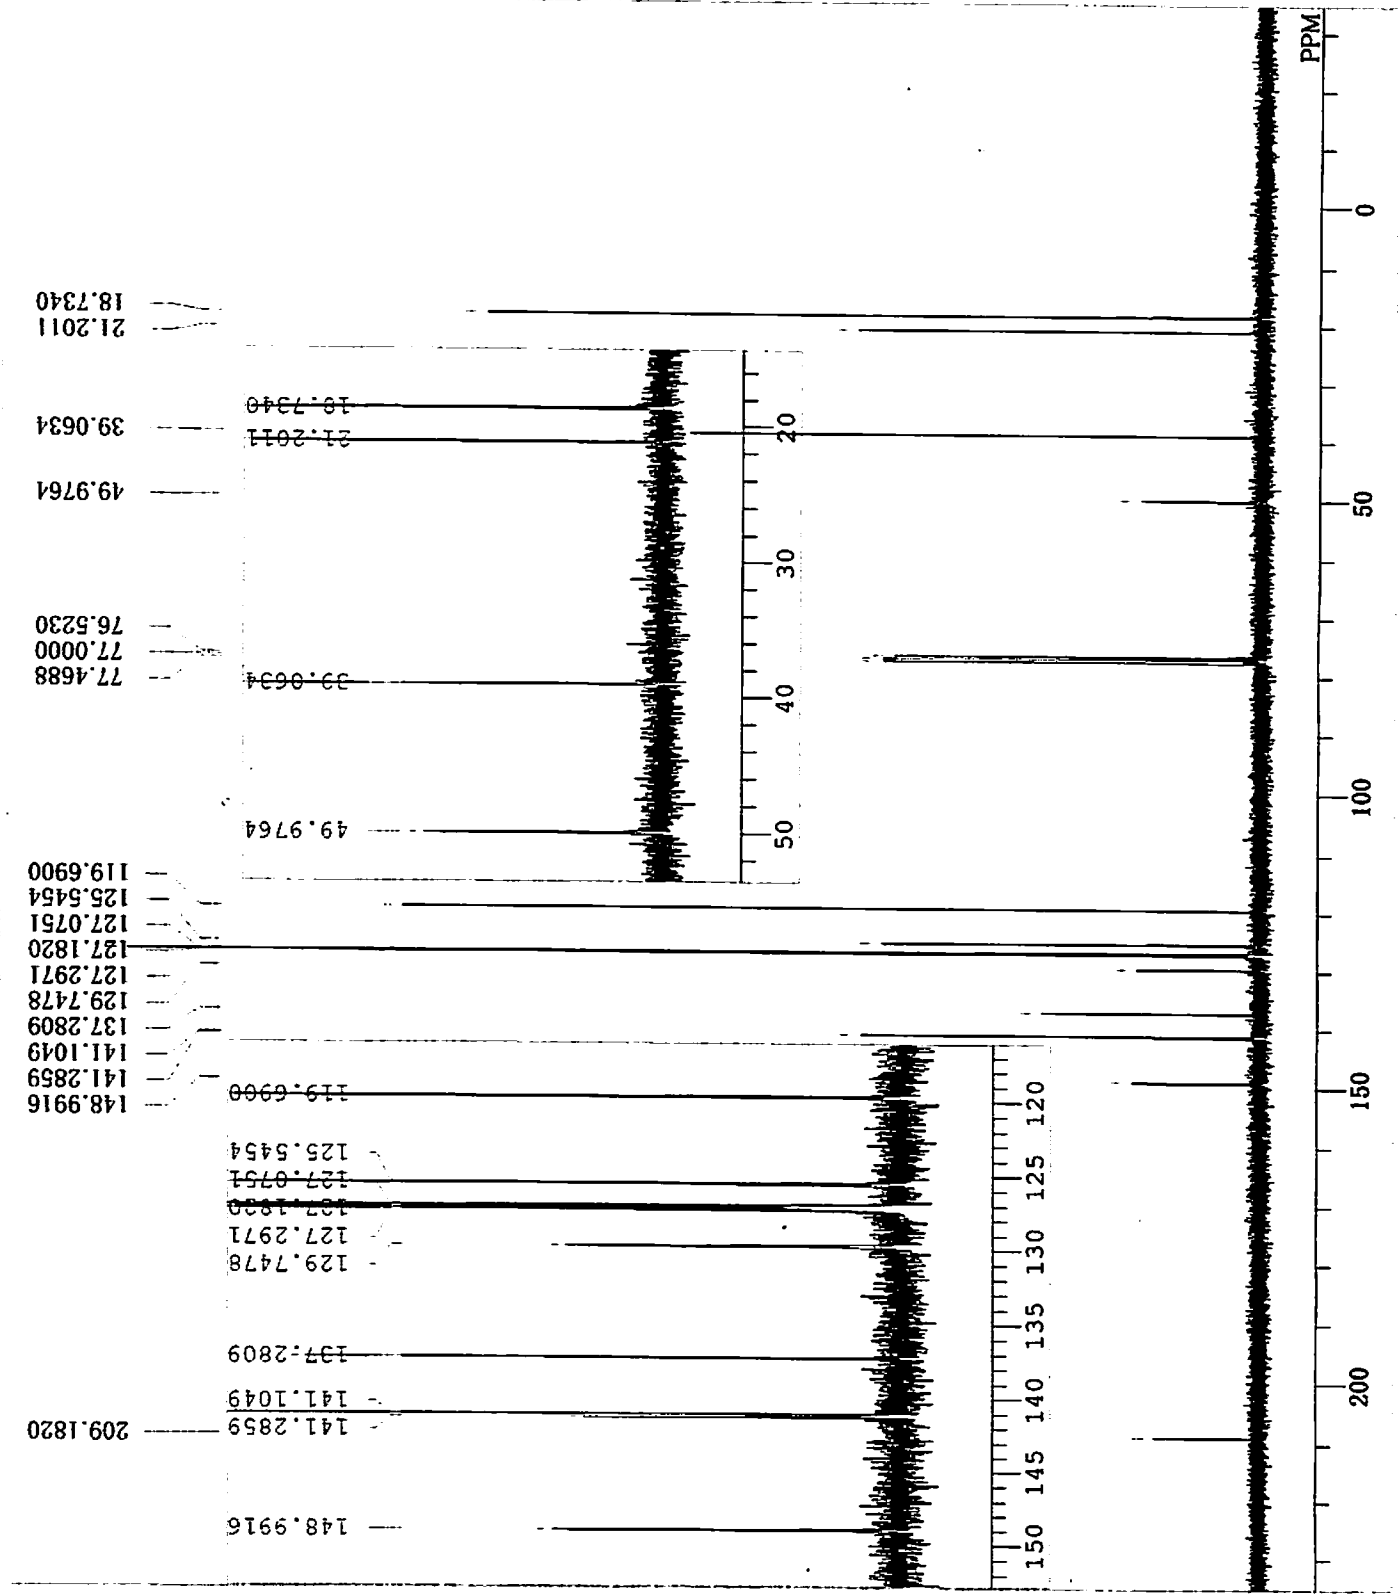





DEFAULT.ALS  
green  
Sat Dec 08 16:03:46 2007  
13C  
BCM

Supplementary Material (ESI) for Chemical Communications  
This journal is (c) The Royal Society of Chemistry 2008

67.80 MHz  
135.00 KHz  
5200.00 Hz  
32768  
18306.64 Hz  
1444  
1.7900 sec  
1.2100 sec  
3.50 usec  
1H  
21.4 c  
CDCL3  
77.00 ppm  
0.12 Hz  
26

107-7

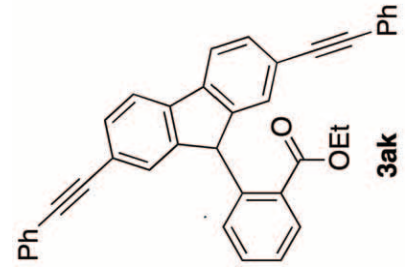

DFILE  
COMNT  
DATIM  
OBNUC  
EXMOD  
OBFRO  
OBSET  
OBFIN  
POINT  
FREQU  
SCANS  
ACQTM  
PD  
PWI  
IRNUC  
CTEMP  
SLVNT  
EXREF  
BF  
RGAIN

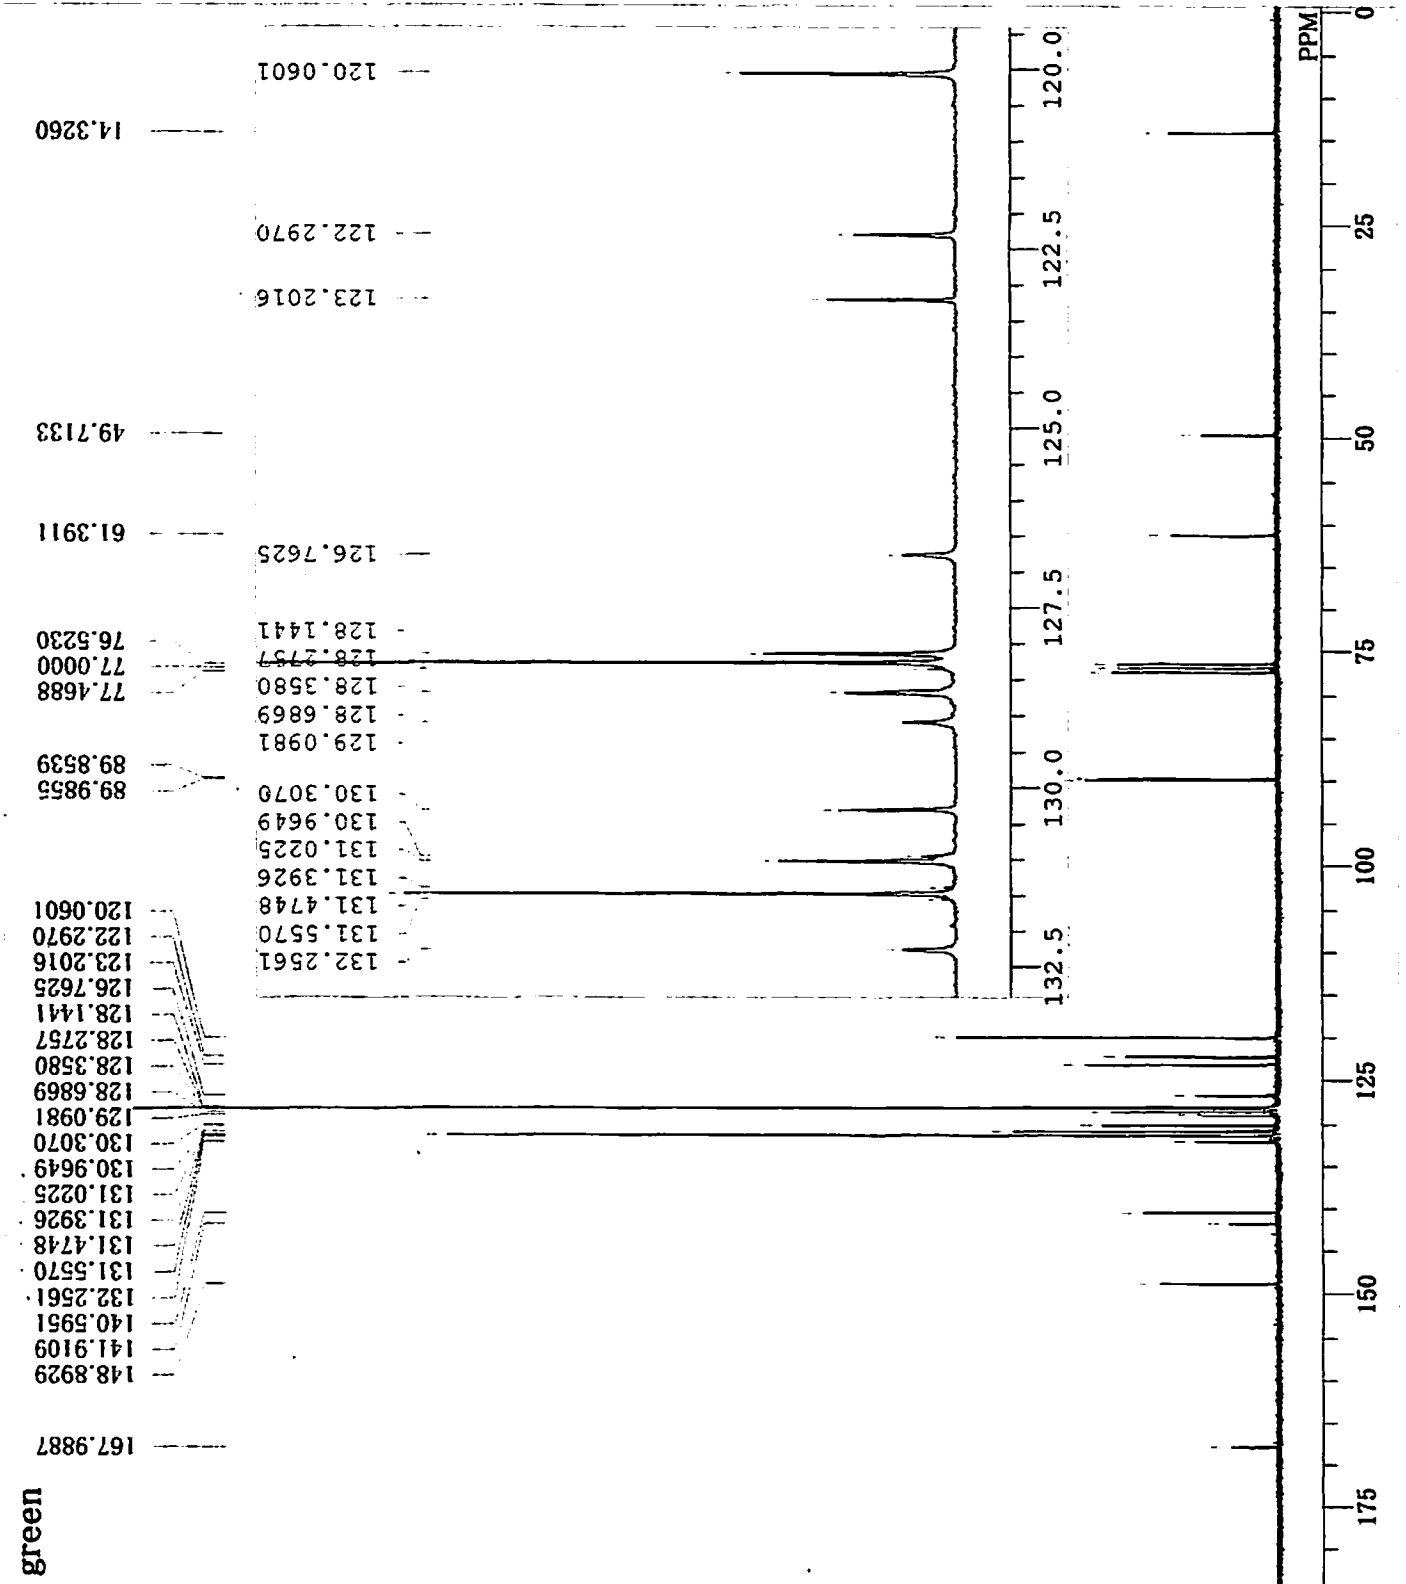

\_DEFAULT.ALS  
Thu Aug 23 18:13:17 2007

Supplementary Material (ESI) for Chemical Communications  
This journal is (c) The Royal Society of Chemistry 2008

DFILE  
COMNT  
DATIM  
OBNUC  
EXMOD  
OBFRQ  
OBSET  
POINT  
FREQU  
SCANS  
ACQTM  
PD  
PW1  
IRNUC  
CTEMP  
SLVNT  
EXREF  
BF  
RGAIN

1H  
NON  
270.05 MHz  
112.00 KHz  
5800.00 Hz  
16384  
5401.76 Hz  
16  
3.0331 sec  
3.9670 sec  
5.40 usec  
1H  
17.8 c  
CDCL3  
7.26 ppm  
0.12 Hz  
15

3-4

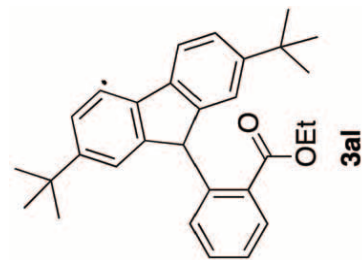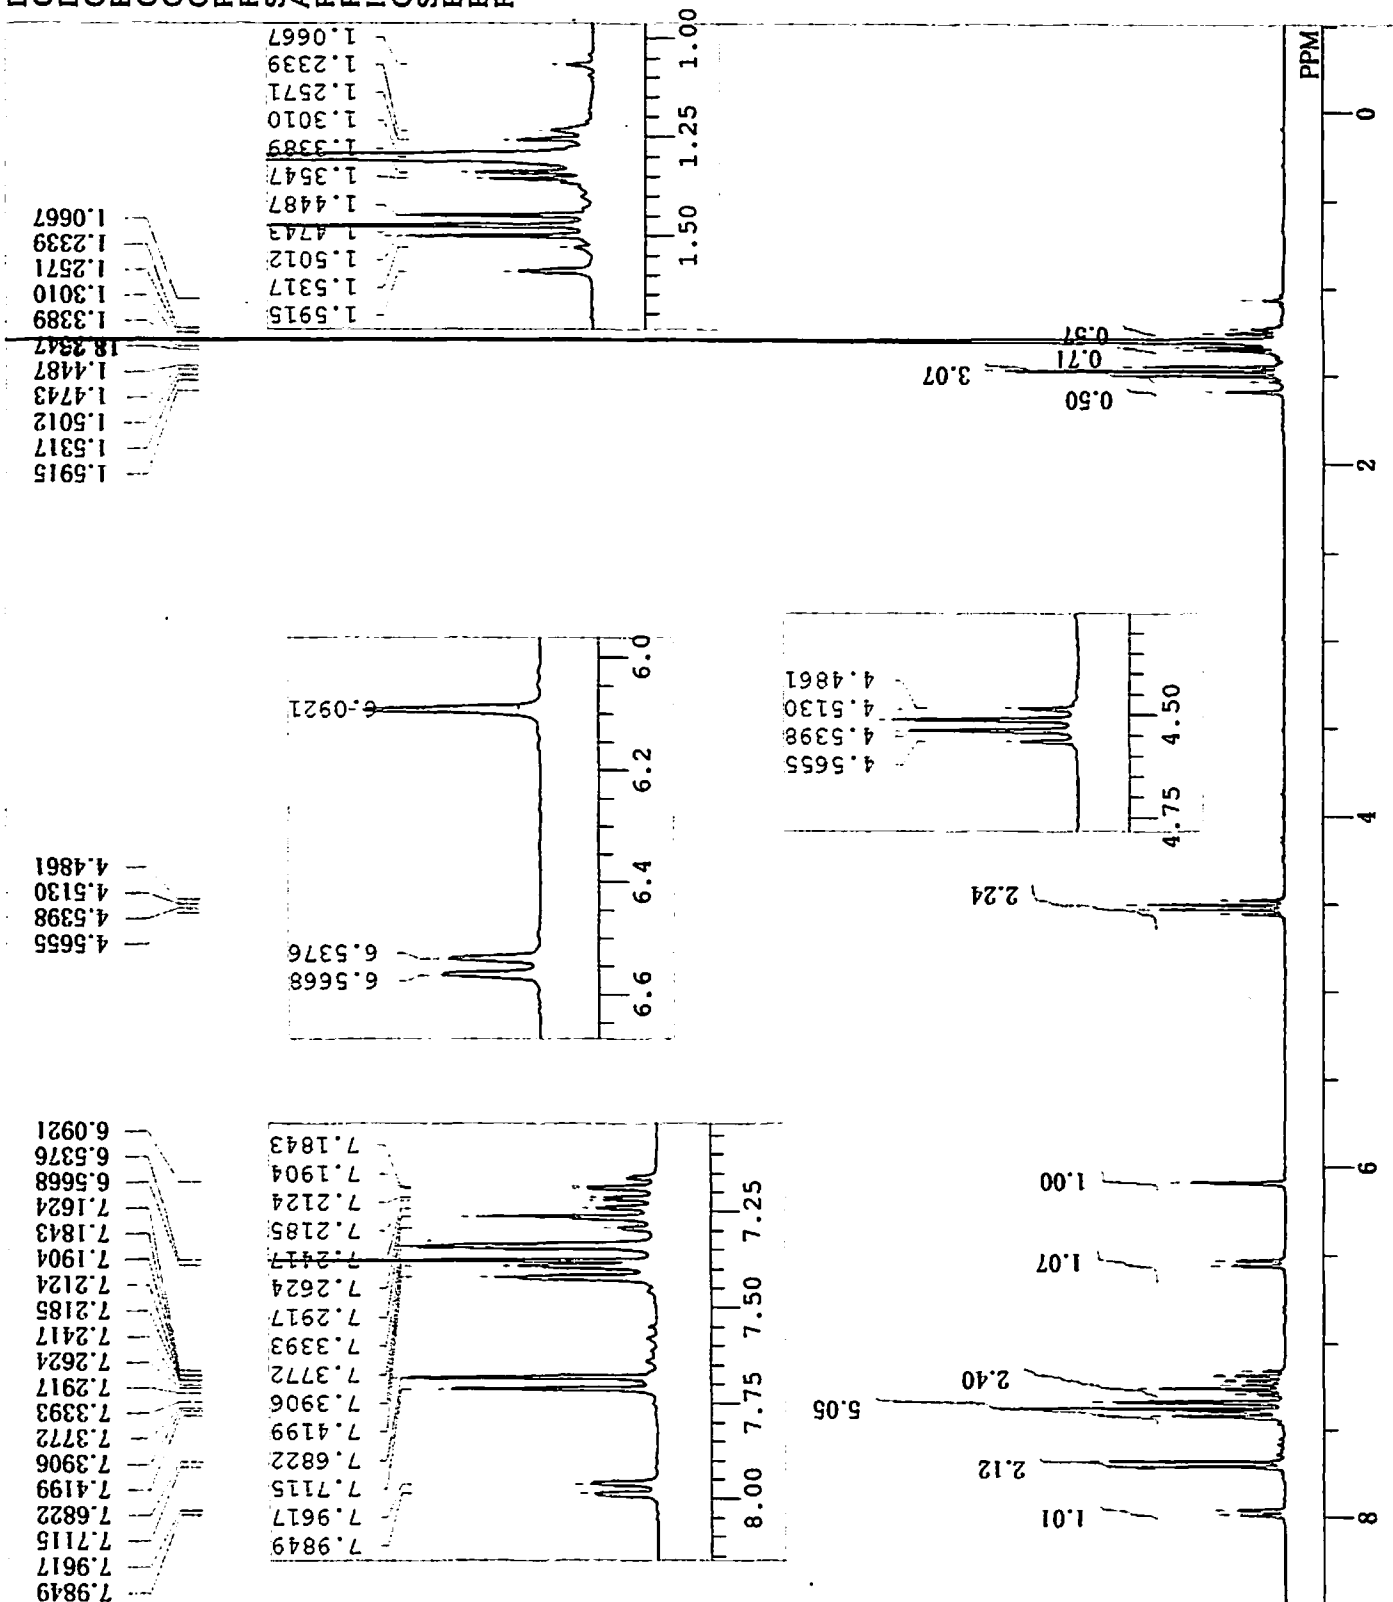

\_DEFAULT.ALS

Thu Aug 23 19:21:10 2007

Supplementary Material (ESI) for Chemical Communications  
This journal is (c) The Royal Society of Chemistry 2008

DFILE  
COMNT  
DATIM  
OBNUC  
EXMOD  
OBFRQ  
OBSET  
OBFIN  
POINT  
FREQU  
SCANS  
ACQTM  
PD  
PW1  
IRNUC  
CTEMP  
SLVNT  
EXREF  
BF  
RGAIN

67.80 MHz  
135.00 KHz  
5200.00 Hz  
32768  
18306.64 Hz  
1280  
1.7900 sec  
1.2100 sec  
3.50 usec  
1H  
19.5 c  
CDCL3  
77.00 ppm  
0.12 Hz  
26

2-3-5

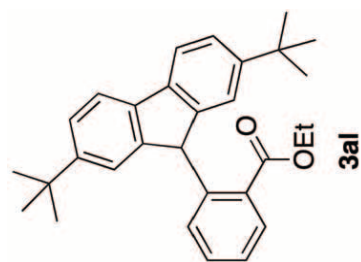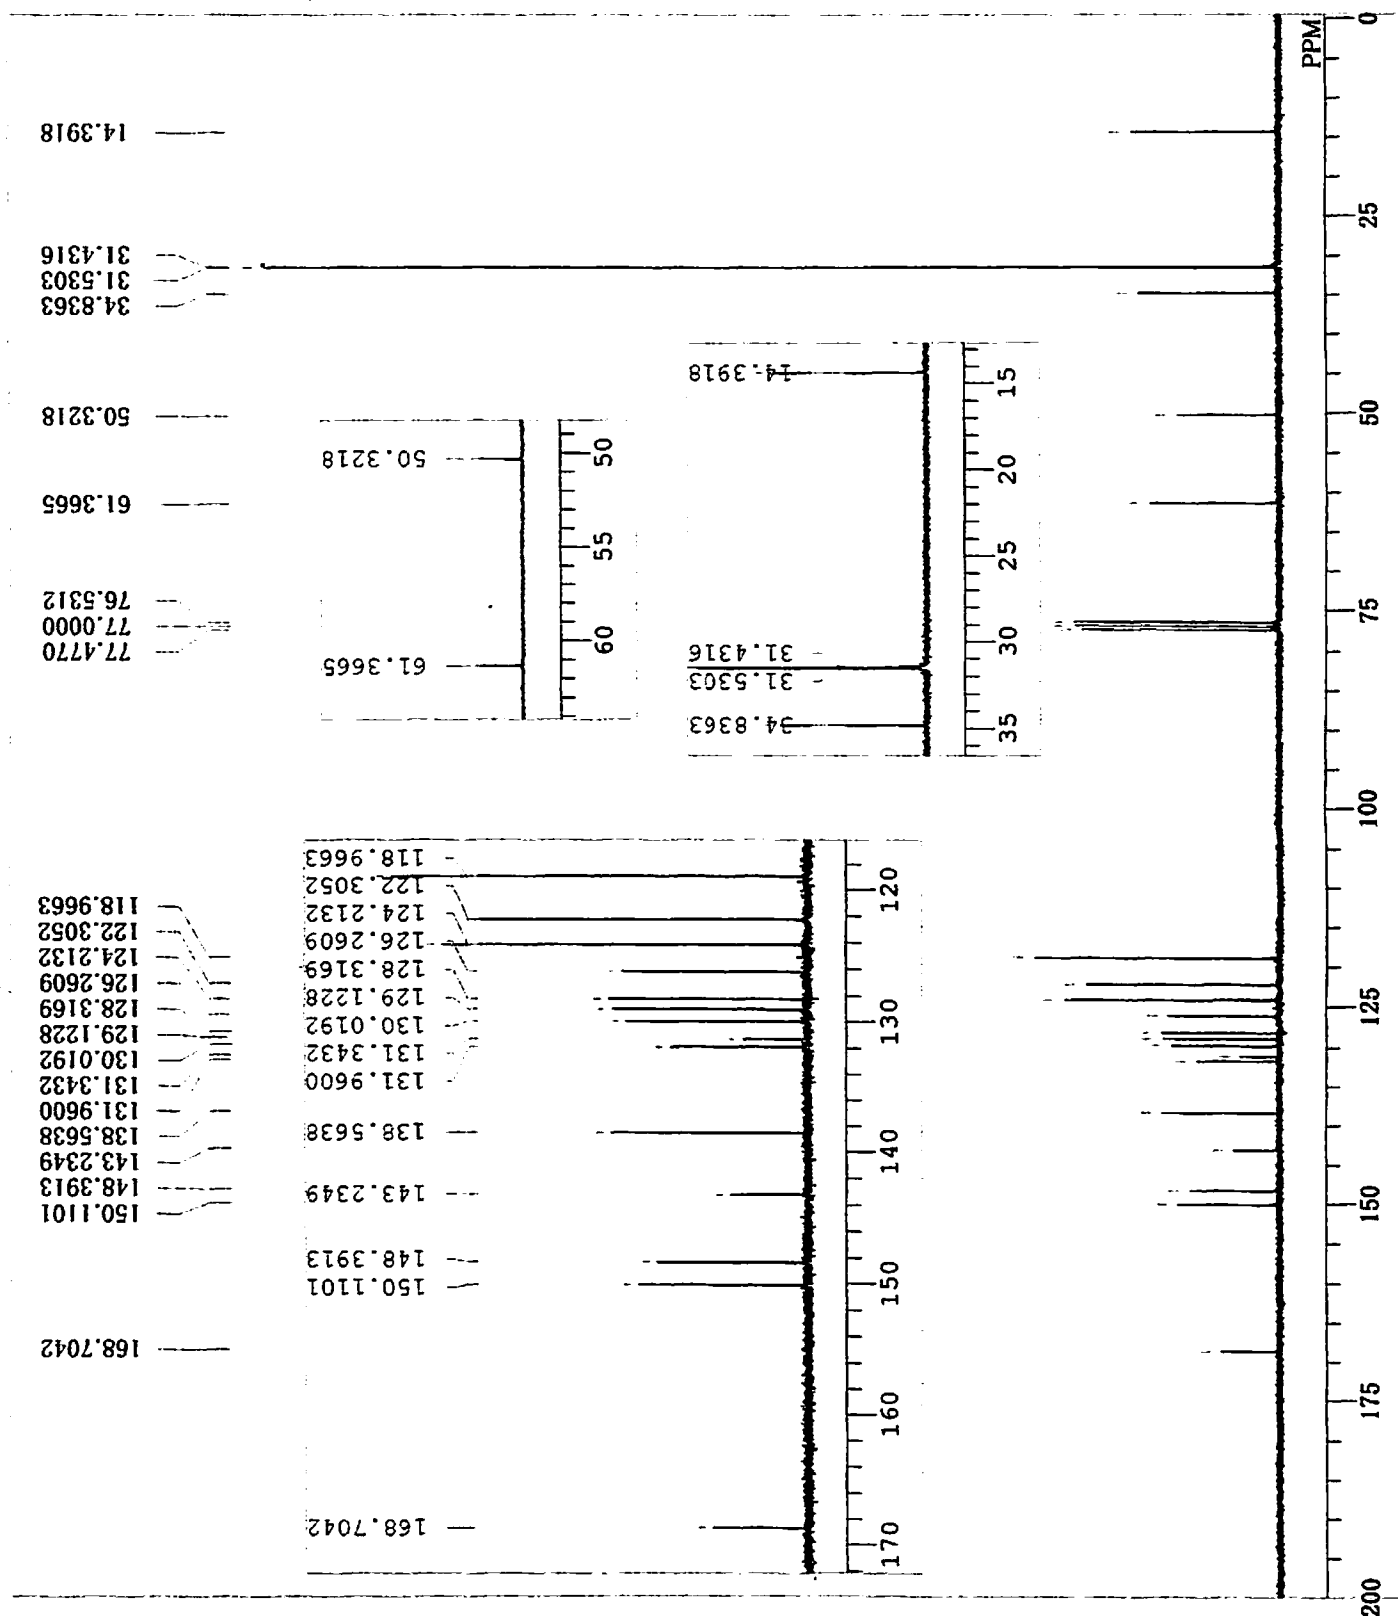

\_DEFAULT.ALS

Thu Nov 29 11:00:52 2007

Supplementary Material (ESI) for Chemical Communications  
This journal is (c) The Royal Society of Chemistry 2008

270.05 MHz  
 112.00 KHz  
 5800.00 Hz  
 16384  
 5401.76 Hz  
 16  
 3.0331 sec  
 3.9670 sec  
 5.40 usec  
 18.7 c  
 7.26 ppm  
 0.12 Hz  
 19  
 CDCL<sub>3</sub>  
 3am

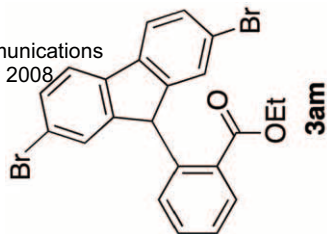

1-31-10

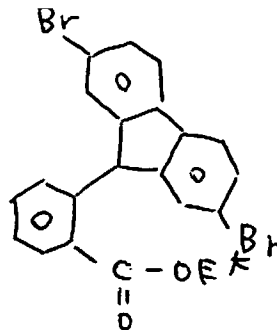

DFILE  
 COMNT  
 DATIM  
 OBNUC  
 EXMOD  
 OBFRQ  
 OBSSET  
 OBFIN  
 POINT  
 FREQU  
 SCANS  
 ACQTM  
 PD  
 PW1  
 IRNUC  
 CTEMP  
 SLVNT  
 EXREF  
 BF  
 RGAIN

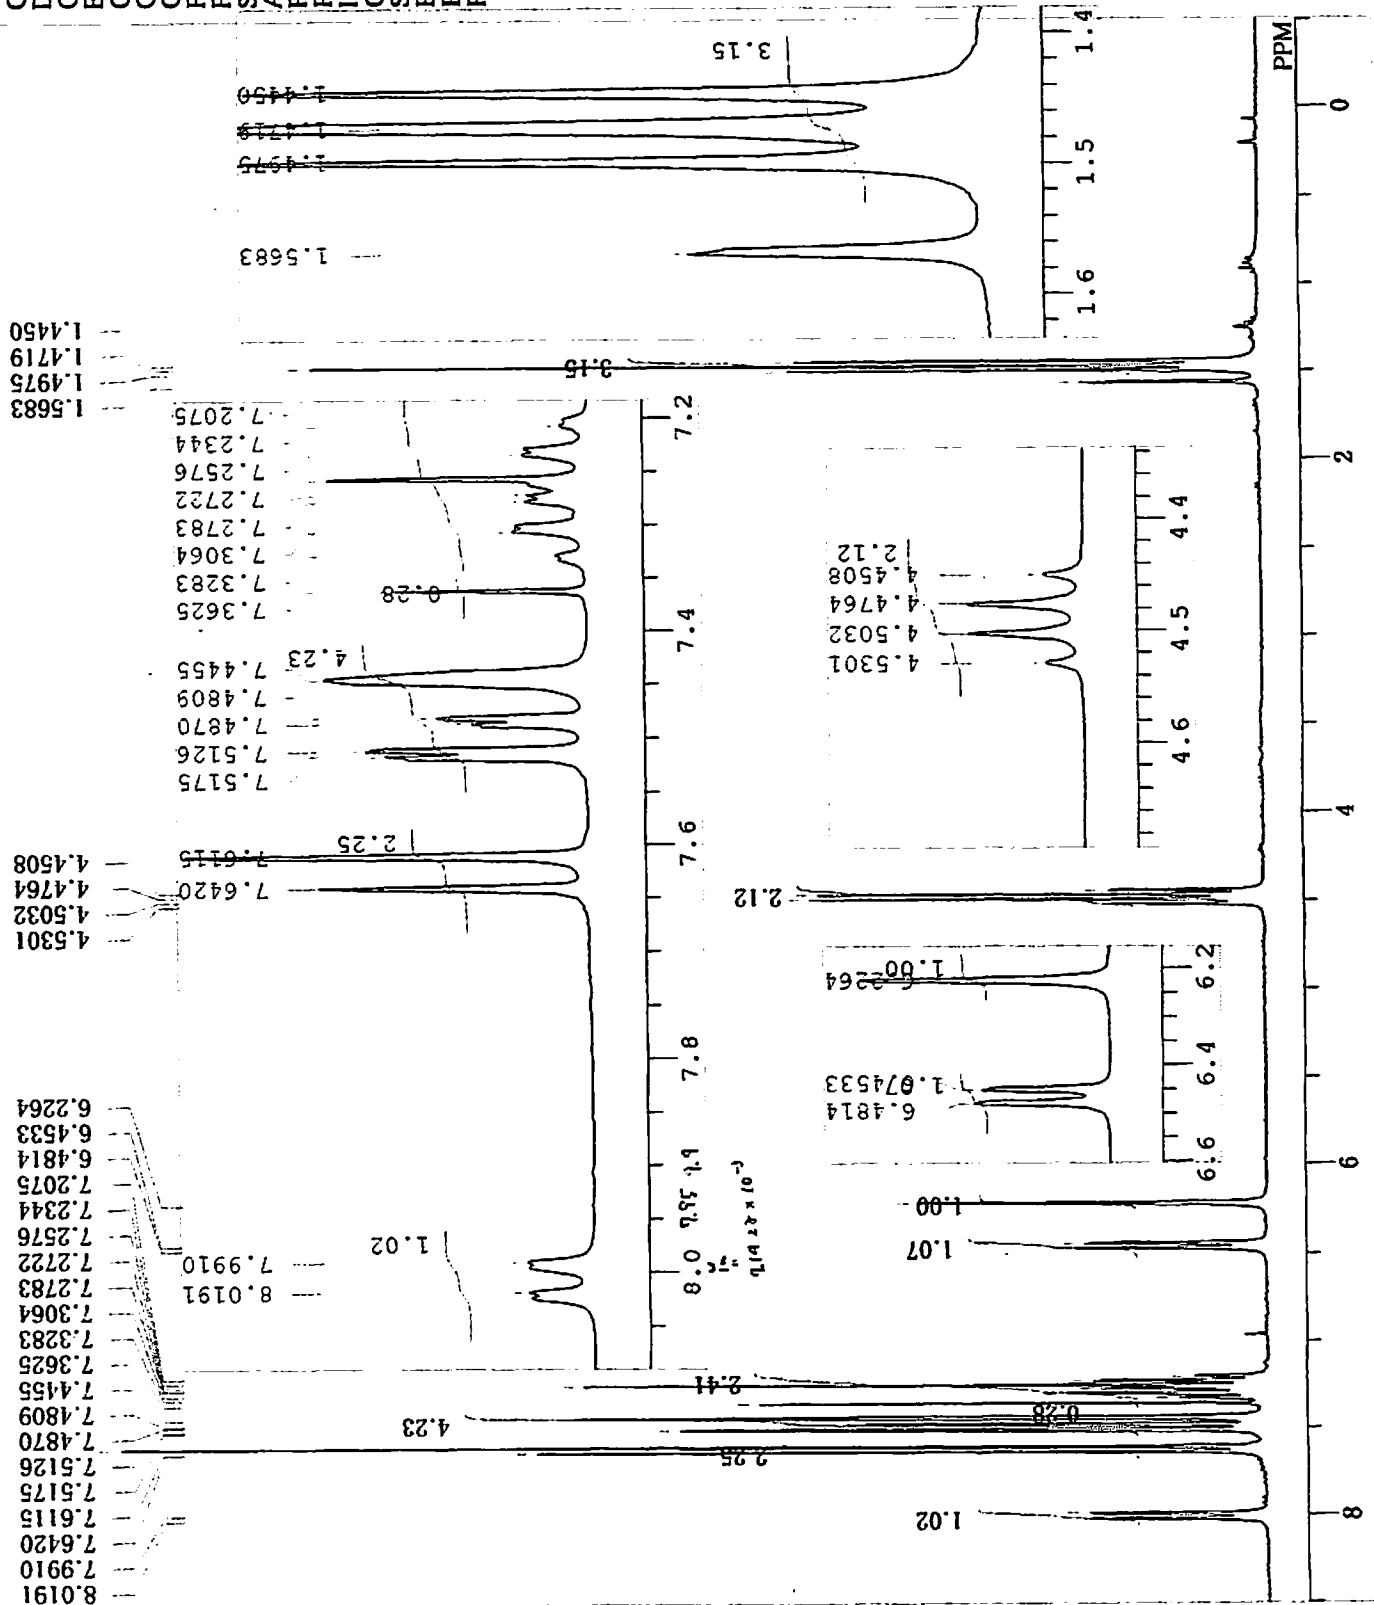

\_DEFAULT.ALS  
 Thu Nov 29 11:55:47 2007

Supplementary Material (ESI) for Chemical Communications  
 This journal is (c) The Royal Society of Chemistry 2008

DFILE  
 COMNT  
 DATIM  
 OBNUC  
 EXMOD  
 OBFRQ  
 OBSET  
 OBFIN  
 POINT  
 FREQU  
 SCANS  
 ACQTM  
 PD  
 PW1  
 IRNUC  
 CTEMP  
 SLVNT  
 EXREF  
 BF  
 RGAIN

67.80 MHz  
 135.00 KHz  
 5200.00 Hz  
 32768  
 18306.64 Hz  
 989  
 1.7900 sec  
 1.2100 sec  
 3.50 usec  
 1H  
 20.4 c  
 CDCL3  
 77.00 ppm  
 0.12 Hz  
 26

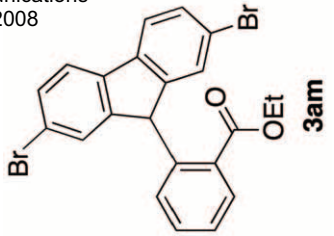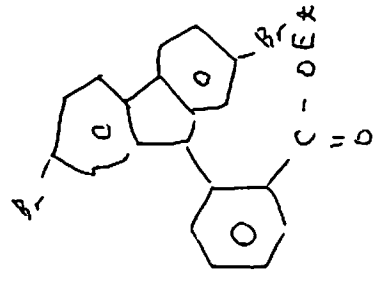

1 - 3 | - ||

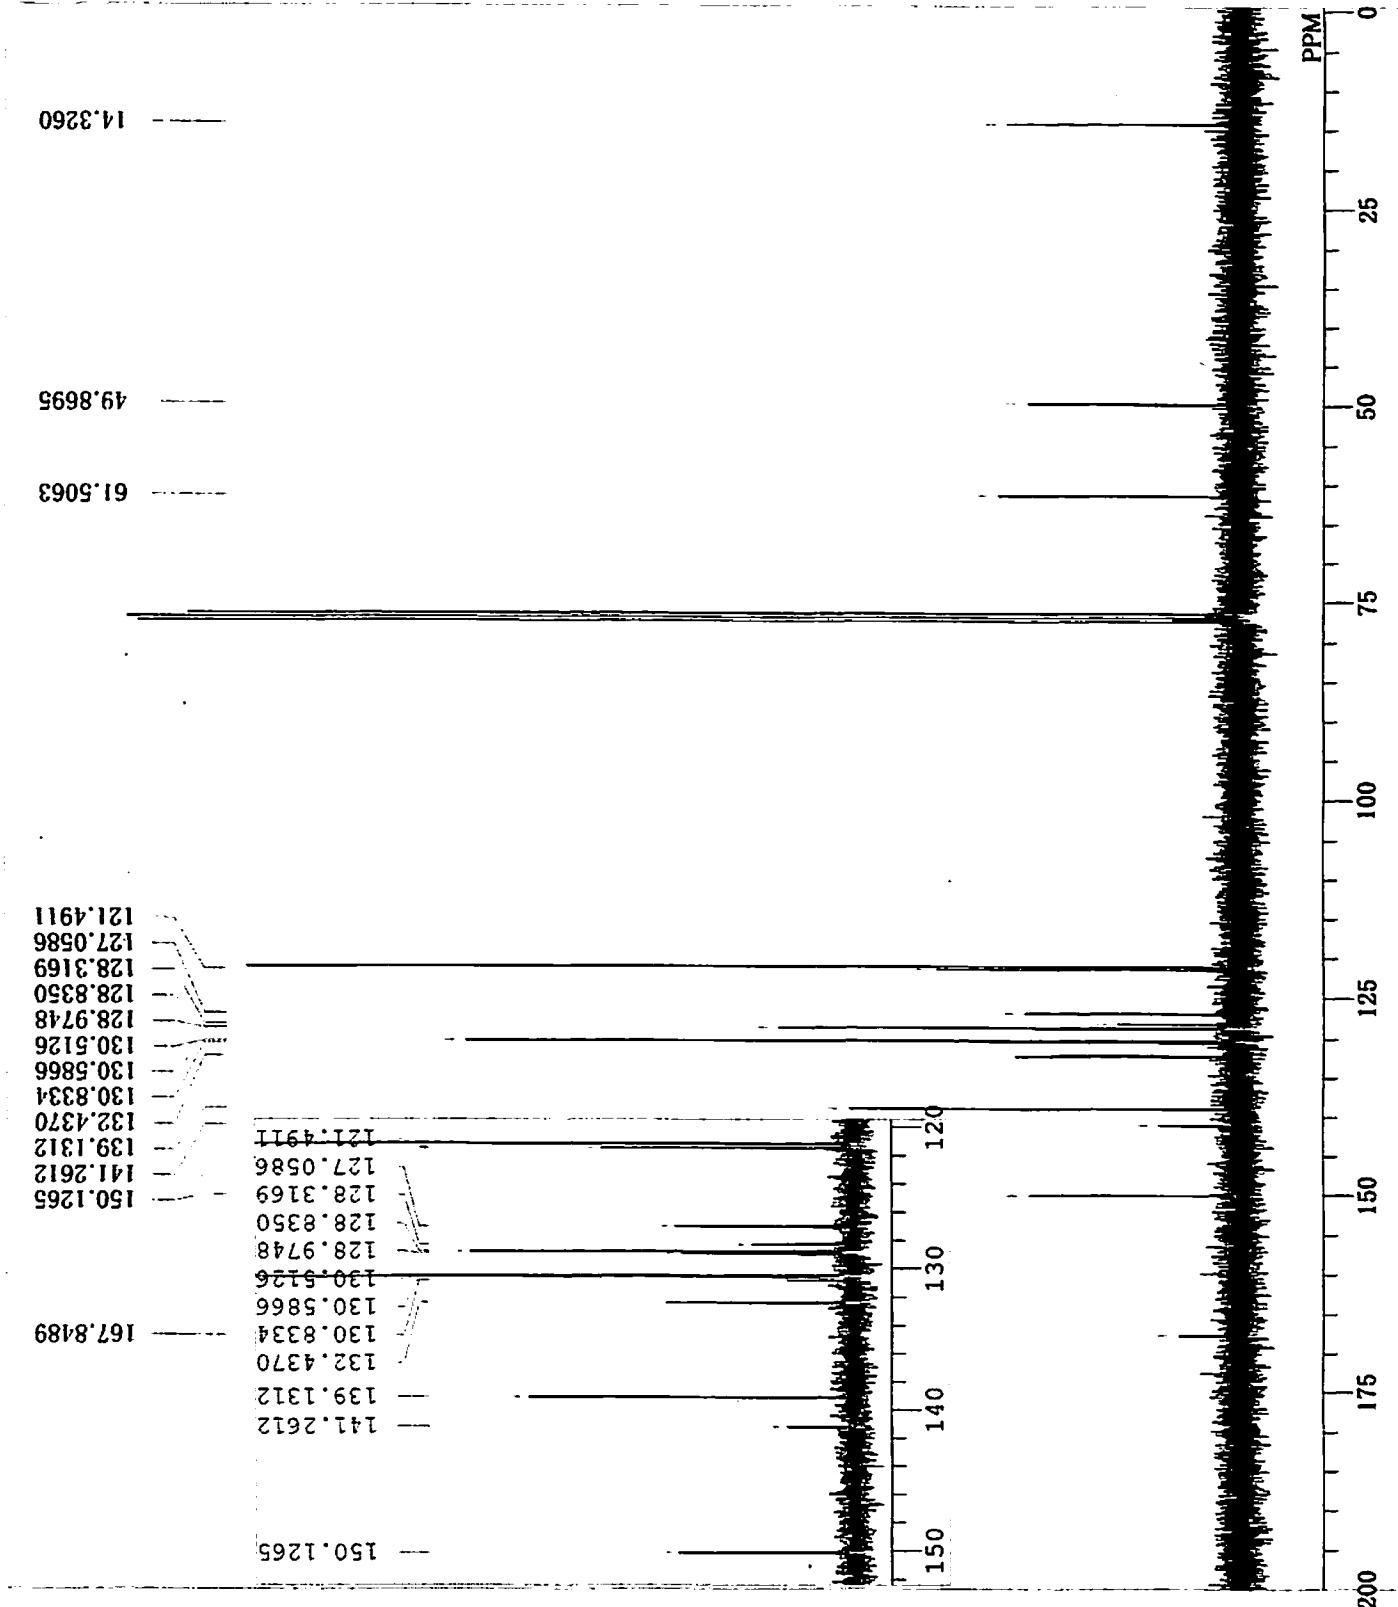

Supplement: b814597k.pdf [file b814597k.pdf]
